1 **Defining the Transcriptional and Epigenetic Basis of Organotypic Endothelial Diversity in**  
2 **the Developing and Adult Mouse**

3

4 Manuel E. Cantu Gutierrez<sup>1,2,3\*</sup>, Matthew C. Hill<sup>1,2,3,4\*</sup>, Gabrielle Largoza<sup>2,3</sup>, James F. Martin<sup>1,2,3,5</sup>

5 Joshua D. Wythe<sup>1,2,3,†</sup>

6

7

8 1. Graduate Program in Developmental Biology, Baylor College of Medicine, Houston, TX.

9 77030, USA

10 2. Cardiovascular Research Institute, Baylor College of Medicine, Houston, TX. 77030, USA

11 3. Department of Molecular Physiology and Biophysics, Baylor College of Medicine, Houston,

12 TX. 77030, USA

13 4. Current addresses: Cardiovascular Research Center, Massachusetts General Hospital,

14 Boston, MA 02129

15 Cardiovascular Disease Initiative, The Broad Institute of MIT and Harvard,

16 Cambridge, MA. 02142, USA.

17 5. Texas Heart Institute, Houston, TX, 77030.

18 \*Equal contribution.

19

20 † To whom correspondence should be addressed:

21 Joshua D. Wythe

22 [wythe@bcm.edu](mailto:wythe@bcm.edu)

23 CVRI, Department of Molecular Physiology and Biophysics, Baylor College of Medicine,

24 One Baylor Plaza, Houston, TX 77030

25 **ABSTRACT**

26 Significant phenotypic differences exist between the vascular endothelium of different  
27 organs, including cell-cell junctions, paracellular fluid transport, shape, and mural cell  
28 coverage. These organ-specific morphological features ultimately manifest as different  
29 functional capacities, as demonstrated by the dramatic differences in capillary  
30 permeability between the leaky vessels of the liver compared to the almost  
31 impermeable vasculature found in the brain. While these morphological and functional  
32 differences have been long appreciated, the molecular basis of endothelial organ  
33 specialization remains unclear. To determine the epigenetic and transcriptional  
34 mechanisms driving this functional heterogeneity, we profiled accessible chromatin, as  
35 well as gene expression, in six different organs, across three distinct time points, during  
36 murine development and in adulthood. After identifying both common, and organ-  
37 specific DNA motif usage and transcriptional signatures, we then focused our studies on  
38 the endothelium of the central nervous system. Using single cell RNA-seq, we identified  
39 key gene regulatory networks governing brain blood vessel maturation, including  
40 TCF/LEF and FOX transcription factors. Critically, these unique regulatory regions and  
41 gene expression signatures are evolutionarily conserved in humans. Collectively, this  
42 work provides a valuable resource for identifying the transcriptional regulators  
43 controlling organ-specific endothelial specialization and provides novel insight into the  
44 gene regulatory networks governing the maturation and maintenance of the  
45 cerebrovasculature.

46

47

## 48 INTRODUCTION

49 The endothelium, which lines all blood vessels and is the main component involved in the  
50 exchange of nutrients and waste throughout the body, is presumed to have evolved in a  
51 common vertebrate ancestor some 500 million years ago, following the divergence of  
52 urochordates and cephalochordates (Aird, 2012). Studies in hagfish, the oldest living  
53 vertebrate with a closed circulatory system, revealed that the endothelium is molecularly,  
54 anatomically, and functionally heterogeneous (Feng et al., 2007; Yano et al., 2007). This  
55 suggests that phenotypic heterogeneity is an evolutionarily conserved, core feature of the  
56 vascular endothelium. Yet, the molecular basis of this heterogeneity remains poorly  
57 understood.

58 The tubular networks formed by endothelial cells extend throughout the  
59 mammalian body, and no cell is more than 100-150  $\mu\text{m}$  away from the capillary vessels,  
60 which supply tissues with oxygen and nutrients and also remove cellular waste products  
61 (Carmeliet and Jain, 2000). Despite a shared mesodermal origin and a host of common  
62 functions, endothelial cells are not a homogenous population (Aird, 2007, 2012;  
63 Jambusaria et al., 2020). Indeed, the endothelium varies not only across organs, with  
64 diverse physiological functions and anatomical compositions, but also across  
65 embryogenesis, allowing vessels to adapt to meet the diverse energetic demands of their  
66 surrounding tissues (Kalucka et al., 2020; Marcu et al., 2018; Nolan et al., 2013; Paik et  
67 al., 2020). For example, the hepatic sinusoidal capillaries of the liver feature large  
68 intercellular gaps (or fenestrae) between endothelial cells and lack an organized  
69 basement membrane, which allows for maximal contact and exchange between blood  
70 and hepatocytes in the space of Disse (Hwa and Aird, 2007). These fenestrae are

71 essential for receptor-mediated endocytosis of lipoproteins, and allow sinusoidal ECs to  
72 function as scavengers, eliminating soluble macromolecular waste. In contrast, the  
73 primary function of ECs within the kidney glomeruli is to filter fluids and solutes (Mohamed  
74 and Sequeira-Lopez, 2019). While glomerular capillary ECs also possess intercellular  
75 fenestrae, these gaps are smaller in glomerular ECs than in their liver sinusoidal  
76 counterparts (60-80 nm in diameter vs 100-200 nm). However, glomerular holes in the  
77 basement membrane cover more cell surface area (~20% vs 6-8%, respectively) (Churg  
78 and Grishman, 1975). Unlike sinusoidal ECs, glomerular ECs secrete and deposit a  
79 glycocalyx, a formidable (60-300 nm thick) cell surface layer of membrane-associated  
80 proteoglycans, glycolipids, glycosamines, and associated plasma proteins that forms  
81 another filtration barrier (based on charge) (Menzel and Moeller, 2011).

82 In addition to heterogeneity between organs, ECs *within* organs also display  
83 substantial differences. While well-established molecular and functional differences  
84 distinguish the endothelium of arterial, arteriole, venous, venule, and capillary vessels  
85 (Fish and Wythe, 2015), multiple recent reports have identified additional distinct EC  
86 subpopulations within adult mouse organs, such as the lung (Vila Ellis et al., 2020). When  
87 one considers the diverse microenvironments within an organ, such as the kidney, where  
88 ECs in the vasa recta of the inner medulla exist in a low oxygen, hyperosmolar,  
89 hyperkalemic environment, it is perhaps not surprising that a recent study identified up to  
90 24 distinct renal endothelial phenotypes (Dumas et al., 2020). Clearly the adaptations  
91 required to thrive in this harsh environment are different than those of capillaries located  
92 proximal to alveoli within the oxygen-rich environment of the lung. These diverse functions  
93 and phenotypes of ECs demonstrate their inherit phenotypic plasticity, and suggest that



94 cellular heterogeneity is a core property that allows ECs to fulfill their multiple tasks.  
95 Conceptually, this makes sense, as the endothelial network that traverses the body must  
96 adapt to fulfill the diverse physiological demands of the underlying tissues. In support of  
97 this concept, uncoupling endothelial cells from their native microenvironment and local  
98 extracellular cues (i.e. cytokines, metabolites, cell-cell contacts with underlying  
99 parenchymal cells, etc.) by growing them in culture leads to phenotypic drift, as unique  
100 markers and molecular signatures are lost (Aranguren et al., 2013; Burridge and  
101 Friedman, 2010; Goldman et al., 2020; Lacorre et al., 2004). Conversely, *in vivo*  
102 transplantation studies showed that the local tissue microenvironment can alter  
103 endothelial cell gene expression (Aird et al., 1997).

104         Despite their residing in distinct locations, endothelium within these various organs  
105 all possess the same genome. Thus, their functional diversification likely derives from  
106 how the genome is activated via chromatin accessibility and/or epigenetic regulation  
107 (Augustin and Koh, 2017; Cleuren et al., 2019). Enhancers, non-coding regions of the  
108 genome that modify transcriptional output, are central nodes in transcriptional networks,  
109 integrating multiple upstream signals into unified outputs that act to regulate promoter  
110 activity and ultimately induce changes in gene expression (Visel et al., 2009b). Several  
111 techniques have emerged to map enhancers, which are difficult to predict *a priori* due to  
112 their undefined sequence or location (with respect to their target genes). Methods such  
113 as immunoprecipitation for unique covalent histone modifications associated with  
114 transcriptionally active chromatin (e.g., acetylation of histone H3 lysine 27, H3K27ac)  
115 followed by next-generation sequencing (ChIP-seq), or DNase hypersensitivity mapping,  
116 have identified potential regulatory elements. However, while most enhancers are DNase

117 hypersensitive, most DNase hypersensitive regions are not active enhancers (Crawford  
118 et al., 2006; Thurman et al., 2012). Similarly, while H3K27ac is enriched in cell-type  
119 specific enhancers (Crawford et al., 2006; Thurman et al., 2012), this mark alone may not  
120 accurately predict enhancers (Dogan et al., 2015). Ep300, a transcriptional co-activator  
121 and histone acetyltransferase that catalyzes H3K27 acetylation, is perhaps a stronger  
122 indicator of active enhancers (Visel et al., 2009a), yet reproducibility of P300-binding sites  
123 has been an issue due to antibody variability (Gasper et al., 2014; Zhou et al., 2017).  
124 Additionally, purifying endothelium from different organs for expression profiling or  
125 epigenetic studies is not trivial, and complicated FACS procedures represent a serious  
126 bottleneck and may introduce artifacts from the time of tissue collection to the time of  
127 analysis. Furthermore, the amount of input material required can be daunting if the  
128 lineage of interest comprises a small fraction of the cells in a tissue of interest (e.g. the  
129 approximately 5,000 endothelial cells of the adult retina, for example). ATAC-seq (Assay  
130 for Transposase-Accessible Chromatin using sequencing) overcomes these hurdles, as  
131 it uses a robust, transposase enzyme-based method to profile open, accessible  
132 chromatin, rather than histone modifications, and requires substantially less input (50,000  
133 nuclei, or less)(Buenrostro et al., 2013).

134 By combining Cre-dependent expression of a genetically encoded, fluorescently  
135 tagged nuclear membrane protein (Sun1-2xsfGFP) (Mo et al., 2015) with an endothelial-  
136 specific CreER driver line (Sorensen et al., 2009), we selectively isolated endothelial  
137 nuclei from six different organs, across three developmental timepoints, via INTACT  
138 (isolation of nuclei tagged in specific cell types) (Deal and Henikoff, 2010). As ATAC-Seq  
139 requires little biological material (50,000 nuclei), we were able to process the remaining

140 nuclei for transcriptional analysis by RNA-sequencing to define both the shared, and  
141 unique, transcriptional and epigenomic features of the vascular endothelium of six  
142 different organs during three stages of murine development. Using this strategy, we  
143 identified common accessible chromatin regions present in all organs, as well as the  
144 DNA-binding motifs within these regions, to define a “core” endothelial transcriptional  
145 code involving ETS and SOX family transcription factors. We then mined this data to  
146 identify organ-specific, accessible endothelial enhancers in embryonic and postnatal  
147 development, as well as in the adult mouse. Analysis of these putative organ-specific,  
148 accessible enhancers and promoters revealed transcription factor DNA-binding motifs –  
149 which likely govern EC gene expression – within these distinct organs, while gene  
150 expression analysis identified the specific transcription factor family member(s) likely  
151 driving gene expression through these unique DNA regulatory elements. We extended  
152 these observations to examine the transcriptional and epigenetic changes in the  
153 vasculature of the central nervous system across developmental time, and through  
154 extensive single cell RNA-seq and bioinformatic analysis we identified gene regulatory  
155 networks that govern angiogenesis and blood brain barrier maturation in the mouse.  
156 Critically, profiling accessible chromatin in human brain endothelial cells determined that  
157 the transcriptional networks identified in the mature mouse brain were evolutionarily  
158 conserved in humans. Thus, we present a compendium of shared, and unique,  
159 transcriptome and epigenetic data across multiple organs, throughout development and  
160 adulthood, for identification of the key transcriptional regulators and DNA-binding motifs  
161 that govern organ-specific endothelial gene expression of the vascular endothelium.

162

## 163 RESULTS

### 164 Endothelial Cell Chromatin Accessibility Profiling Using INTACT and ATAC-Seq Across

165 Multiple Organs Over Time: To analyze organ-specific differences in endothelial  
166 chromatin accessibility and gene expression, we used a previously validated,  
167 endothelial-specific CreERT2 driver line (*Cdh5-PAC-CreER*) (Sorensen et al., 2009),  
168 combined with a Cre-dependent reporter mouse (*Rosa26<sup>CAG-lox-stop-lox-Sun1-sfGFP</sup>*, denoted  
169 as *R26<sup>Sun1-sfGFP</sup>*) (Mo et al., 2015). Combining these two alleles allows for tissue-  
170 specific expression of super folder GFP (sfGFP) in the nuclear envelope of endothelial  
171 cells following administration of tamoxifen. This Cre-dependent labeling enabled  
172 isolation of nuclei tagged in specific cell types (INTACT) via affinity pulldown for sfGFP  
173 tagged nuclei (Mo et al., 2015). A mixture of total nuclei was used as a control (i.e.  
174 “input”), while *Cdh5-CreER*-recombined sfGFP-immunoprecipitated nuclei were  
175 considered endothelial. Both input and endothelial samples were processed for ATAC-  
176 Seq (Buenrostro et al., 2013) and nuclear RNA-seq to identify differentially accessible  
177 chromatin and unique transcriptional signatures specific to the endothelium of each  
178 different organ (the processing pipeline is shown in Figure 1A). Endothelial cells from  
179 the embryonic day 12.5 (E12.5) trunk, brain, and heart, as well as the postnatal day 6  
180 (P6) and adult mouse brain, retina, heart, lung, liver, and kidneys were analyzed (a full  
181 list of samples can be found in Supplemental Table 1).

182 To confirm the integrity of our organ collection and tissue processing pipeline, we  
183 analyzed the chromatin accessibility for genomic loci whose transcripts are enriched in  
184 the non-EC major cellular constituents of each organ sampled (i.e. neurons in the brain,  
185 cardiomyocytes in the heart, etc.). Accordingly, *Map2* (*Microtubule Associated Protein 2*

186 ) (Kanai and Hirokawa, 1995; Matus et al., 1981) accessibility was enriched in brain  
187 input comparted to EC nuclei, while *Tnnt2* (*Troponin T2, Cardiac*) (Wang et al., 2001;  
188 Yan et al., 2016) was elevated in the heart input, *Alb* (*Albumin*) (Kimball et al., 1995;  
189 Redman, 1969) in the liver input, *Sftpc* (*Surfactant pulmonary associated protein C*)  
190 (Nureki et al., 2018) was elevated in in the lung input, and open chromatin surrounding  
191 the *Kap* (*Kidney androgen-regulated protein*) locus was enriched in the kidney input  
192 (Toole et al., 1979). Next, we verified that pan-vascular markers, such as *Cdh5*  
193 (encoding VE-Cadherin) (Harris and Nelson, 2010), *Pecam1* (CD31) (Newman, 1994)  
194 and *Erg* (ERG) (Birdsey et al., 2008) featured increased chromatin accessibility in  
195 isolated EC nuclei compared to total input across all tissue types and timepoints  
196 (Figures 1B). Examination of our nuclear RNA-seq results confirmed the purity of each  
197 organ isolation, as well as the selective enrichment of endothelial nuclei over total input.  
198 For example, the neuronal synaptic receptor *Sorcs3* (*sortilin-related receptor CNS*  
199 *expressed 3*) was enriched in the brain (Christiansen et al., 2017), while ubiquitin ligase  
200 *Rnf207* (*RING finger protein 207*) was differentially expressed in the heart (Roder et al.,  
201 2014), *Gckr* (*Glucokinase regulatory protein*) in the liver (Wang et al., 2013), *Slco4c1*  
202 (*Solute carrier organic anion transporter family, member 4C1*) in the lung (Leikauf et al.,  
203 2012), and *Magi-2* (*MAGUK Inverted 2*) in the kidney (Balbas et al., 2014), yet these  
204 transcripts were depleted in the endothelial nuclei of each organ, respectively.  
205 Conversely, the EC-enriched transcripts *Pecam1* and *Erg* (*Ets Related Gene*) were  
206 enriched in all endothelial nuclei samples, confirming the specificity of our experimental  
207 approach (Figure 1C).  
208

209 *Endothelial Cells Feature a Core Epigenetic Landscape Across Time and Space: After*  
210 confirming the integrity of our processing pipeline, we next investigated whether  
211 endothelium from different organs and at unique developmental stages share a  
212 common “core” of accessible chromatin regions and a shared transcriptional signature.  
213 We identified 2,646 endothelial-enriched accessible regions common to the endothelium  
214 of all organs (Figure 2A, Supplemental Table 1). As non-coding regions typically lack  
215 annotated biological function, we used the Genomic Regions Enrichment of Annotations  
216 Tool (GREAT) (McLean et al., 2010) to computationally identify genes associated with  
217 these open chromatin regions, and then queried these genes for shared functions using  
218 gene ontology (GO) analysis. Vascular development, blood vessel morphogenesis, and  
219 angiogenesis were among the top GO terms common to endothelia across all organs  
220 (Figure 2B, 2C). If these accessible regions function as putative enhancers, or represent  
221 accessible proximal promoters, we hypothesized that the transcription factor motifs  
222 present in these core, common gene regulatory regions might play an important role in  
223 endothelial cell biology. To investigate this, Hypergeometric Optimization of Motif  
224 EnRichment (HOMER) (Heinz et al., 2010) was used to identify transcription factor  
225 motifs enriched in these accessible regions. The ETS family of transcription factors,  
226 including ERG and FLI1 (Friend Leukemia Integration 1), are crucial for endothelial  
227 development (Abedin et al., 2014; Fish et al., 2017; Vijayaraj et al., 2012; Wythe et al.,  
228 2013) and were the most significantly enriched motifs in these commonly accessible  
229 regions (or peaks) (Figure 2D). Notably, motifs for the ETS family members ETV2 (ETS  
230 Variant Transcription Factor 2, also known as ER71) and ETV1 (ETS Variant  
231 Transcription Factor 1) were also significantly enriched, but their transcripts were not

232 detected by RNA-seq (data not shown). Previously, an ETS-dependent enhancer within  
233 intron three of *Delta Like 4 (Dll4)* – regulated by the ETS family member ERG (Wythe et  
234 al., 2013) – as well as an upstream enhancer in Endoglin (*Eng*) – regulated by the ETS  
235 factors FLI1, ERG and ELF1 (E74-like factor 1) – were validated *in vivo* (Pimanda et  
236 al., 2006). These same ETS-dependent enhancers were identified by our analyses  
237 (Figure 2E, F). Motifs for the SOX (SRY related-HMG box) family of transcription factors  
238 were the second most abundant known DNA binding sites present in regions of open  
239 chromatin within the endothelium (Figure 2D). The SOXF subfamily (*Sox7, 17, and 18*)  
240 shows partial redundancy in controlling angiogenesis and vascular maintenance  
241 (Chiang et al., 2017; Lee et al., 2014; Zhou et al., 2015), and *Sox17* was previously  
242 shown to regulate arterial differentiation in mice (Corada et al., 2013) and to control  
243 endothelial to hematopoietic transition (Lizama et al., 2015). Moreover, the SOXB1  
244 subfamily member *Sox2* has also been implicated in endothelial differentiation *in vitro*  
245 (Yao et al., 2019b) and in cerebral arteriovenous malformation *in vivo* (Yao et al.,  
246 2019a). Finally, motifs for the Forkhead Box (FOX) family member FOXO1, which  
247 regulates angiogenesis and endothelial senescence and metabolism (Paik et al., 2007;  
248 Potente et al., 2005; Rudnicki et al., 2018; Wilhelm et al., 2016), were also enriched  
249 across all organs.

250

251 *Organ-Enriched Regions of Accessible Chromatin and Unique Transcription Factor*

252 *Motifs Across the Endothelium:* After characterizing uniformly accessible chromatin

253 regions within the endothelium, and the potential transcription factors that act upon

254 them, we focused our efforts on identifying organ-enriched, endothelial-specific

255 epigenetic signatures from the remaining 90,112 peaks. Merging the three timepoints  
256 (E12.5, P6.5, and Adult) of each organ to a single dataset, we identified 45,075 EC-  
257 enriched peaks that showed differential chromatin accessibility across organs (Figure  
258 3A, Supplemental Table 2). As the brain and retina are both central nervous system  
259 (CNS)-derived organs, their data were merged and compared to all other individual  
260 organs. We identified 6,550 peaks unique to the CNS vasculature; 11,302 regions  
261 specific to the endothelia of the heart; 9,102 to the vessels within the liver; 2,102 open  
262 regions in the lung endothelium; and 3,360 peaks in the kidney vasculature (Figure 3A).  
263 GREAT (McLean et al., 2010) was used to annotate these regions to nearby genes, and  
264 the linked genes were then filtered for enriched gene expression in the endothelium  
265 using our nuclear RNA-sequencing data (qvalue < 0.1 and log2Fold change > 0.5). This  
266 final list of genes was then used to identify GO terms enriched in each organ (Figure  
267 3B). Brain-enriched regions of open chromatin in the endothelium were associated with  
268 genes related to the WNT signaling pathway, as well as cell-cell signaling regulated by  
269 WNT. The liver vasculature featured enriched GO terms in the categories of protein  
270 phosphorylation and cell adhesion, while the lung endothelium featured enriched terms  
271 such as circulatory system processes. The vasculature of the heart and kidney showed  
272 enrichment of genes related to semaphorin-plexin signaling, while the heart also  
273 showed enrichment for the Notch signaling pathway.

274       Next, to determine which transcription factors recognize (and potentially occupy)  
275 these regions of open chromatin in the vessels of each specific tissue, we compared  
276 motif occupancy across all organs (Figure 3C, Supplemental Figure 1). In the brain and  
277 retina, canonical WNT signaling pathway-related factors play an essential role in the



278 development of the blood brain barrier (Daneman et al., 2009; Hupe et al., 2017;  
279 Liebner et al., 2008; Stenman et al., 2008). Among the canonical WNT signaling-related  
280 transcription factors found, motifs for ZIC3, TCF3, TCF4, TCF7 and LEF1 were  
281 preferentially enriched in the brain endothelium compared to other organs (Figure 3C,  
282 Supplemental Figure 1). Additionally, DNA binding motifs for FOX transcription factors  
283 were also overrepresented in the brain. To our knowledge, roles for FOXP1, FOXP1,  
284 FOXF1 and FOXA1 have not been reported in blood brain barrier development.  
285 However, expression of *Foxo3* in the CNS was shown previously, where its  
286 downregulation was reported to ameliorate brain damage after cerebral hemorrhage  
287 (Xie et al., 2021), and *Foxl2* transcripts are reportedly enriched in the brain endothelium  
288 (Hupe et al., 2017).

289         The heart and liver shared motifs for members of the zinc family of transcription  
290 factors GATA1, GATA2, GATA4 and GATA6 (Figure 3C, Supplemental Figure 1).  
291 GATA1 has been described as a potential regulator of endothelial cell function in the  
292 heart and liver (Fan et al., 2009). GATA2, a master regulator of primitive and definitive  
293 hematopoiesis in the liver (de Pater et al., 2013; Lim et al., 2012), is required for  
294 endothelial to hematopoietic transition (EHT) and vascular integrity in mice, and  
295 promotes the generation of hemogenic endothelial progenitors and represses induction  
296 of cardiomyocyte-related genes from human mesoderm (Castano et al., 2019). GATA4  
297 is required for heart valve development (Rivera-Feliciano et al., 2006) and atrial septum  
298 formation (Nadeau et al., 2010) . In the liver, GATA4 controls the development of liver  
299 sinusoidal endothelium (Geraud et al., 2017), while GATA6 is involved in cardiovascular  
300 morphogenesis (Lepore et al., 2006) and liver development (Zhao et al., 2005).

301 Motifs for nuclear factor of activated T cells (NFAT) transcription factors were  
302 specifically enriched in the endothelium of the heart (Figure 3C, Supplemental Figure 1).  
303 *NFATc* genes (*NFATc1-c4*) play key roles in cardiac morphogenesis. *Nfatc1* is a  
304 canonical marker of the endocardium and is required for normal cardiac valve and  
305 septal morphogenesis (de la Pompa et al., 1998; Ranger et al., 1998), as well as  
306 coronary vessel angiogenesis (Zeini et al., 2009), while *Nfatc3/c4* null embryos, and  
307 mutants for their upstream regulator in the heart *Calcineurin (Cnb1)*, both die at E11.5  
308 with excessive vascular growth (Graef et al., 2001). Motifs for helix-turn-helix (HTH) and  
309 winged helix Regulatory Factor binding to the X-box (RFXs) are also enriched in the  
310 heart (Figure 3A-C) (Sugiaman-Trapman et al., 2018). Of these enriched motifs, only  
311 HTH-X-box is involved in heart (Duan et al., 2016), as a role for DNA-binding  
312 *Regulatory Factor 1* and 2 (*Rfx1, Rfx2*) in the heart has not been shown.

313 While SOX2, SOX3 and SOX4 motifs were moderately enriched in endothelium  
314 across all organs, they were particularly enriched in the heart (Figure 3C, Supplemental  
315 Figure 1). To our knowledge, a role for *Sox2* and *Sox3* in the cardiac vascular  
316 endothelium or endocardium has yet to be shown. However, *Sox4* is required for  
317 outflow tract morphogenesis (Schilham et al., 1996) and controls *Tbx3* expression in the  
318 endocardium (Boogerd et al., 2011). LEF1, NFAT and HOXC9 motifs were enriched in  
319 the brain, heart, and kidney, while GATA4 was over-represented in the lung, liver, and  
320 heart, and FOXO3 motifs were increased in the brain, and heart (Figure 3A-C).

321 Notably, motifs for the large MAF (musculoaponeurotic fibrosarcoma) basic  
322 leucine zipper (bZip transcription factors) MAFA and MAFB were enriched in the liver  
323 endothelium (Figure 3C, Supplemental Figure 1). MAF transcription factors are known

324 to interact with ETS1 or SOX TFs in promoter and enhancer modules (Yang and Cvekl,  
325 2007). MAFb is involved in endothelial sprouting during angiogenesis (Jeong et al.,  
326 2017) and lymphangiogenesis (Dieterich et al., 2020). A third member of the large MAF  
327 family, c-MAF, was not present in our motif analysis but it has been directly involved in  
328 liver sinusoidal endothelial cell marker induction (de Haan et al., 2020).

329       Importantly, the aforementioned DNA binding motifs were usually enriched in the  
330 center of regions of open chromatin for each organ (Figure 3D, Supplemental Table 3),  
331 suggesting these factors may be driving chromatin accessibility via acting as pioneer  
332 factors or functioning as transcriptional enhancers. Several of these accessible regions  
333 and DNA binding motifs occurred within, or nearby, loci of transcripts that are elevated  
334 in these individual organs (Figure 3E). For example, *Solute Carrier Family 7 member 1*  
335 (*Slc7a1*), which encodes a cationic amino acid transporter that is enriched the  
336 endothelium of the mature brain (Nalecz, 2017; Zaragoza, 2020), contains a unique  
337 region of open chromatin downstream from the TSS that is unique to the CNS  
338 endothelium, and this region contains a LEF1 motif (Figure 3E). *Cytokine-like 1 (Cyt11)*,  
339 a novel endocardial gene (Feng et al., 2019), contained four regions of open chromatin  
340 unique to the cardiac endothelium, two of which possessed an NFAT motif. *Dipeptidyl-*  
341 *peptidase 4 (Dpp4)*, which encodes a serine protease secreted within the liver  
342 endothelium and hepatocytes (Varin et al., 2019), has a liver endothelial specific region  
343 of open chromatin that contains a GATA4 motif. *Angiotensin-converting enzyme (Ace)*,  
344 expressed throughout the endothelium, contains a lung specific intronic region of open  
345 chromatin with a FOXO3 motif. Finally, the WNT pathway co-receptor, *Leucine-rich*

346 *repeat-containing G-protein coupled receptor 5 (Lgr5)* (Wilson et al., 2020), features a  
347 kidney-specific region of open chromatin upstream of its promoter with a HOXC9 motif.  
348  
349 *Maturation Specific Regions of Accessible Chromatin and Unique Transcription Factor*  
350 *Motifs in the Developing and Adult CNS Endothelium:* After defining the global changes  
351 in chromatin accessibility across all organs, we next examined how chromatin  
352 organization in the endothelium of each organ varied during development. Focusing on  
353 the CNS, we identified 22,182 peaks from E12.5, P6 and Adult (2-month-old)  
354 endothelium specific to the brain or overlapping between the brain and retina. After  
355 annotating peaks to nearby genes using GREAT (McLean et al., 2010), we then filtered  
356 these data for those genes whose transcripts were enriched in the endothelium  
357 compared to input (qvalue < 0.1 and log2Fold change > 0.5). These targets were then  
358 used for Gene Ontology analysis of biological function (FDR < 0.05) (Figure 4A, B,  
359 Supplemental Table 4).

360       Whereas E12.5-enriched genes showed terms related to intracellular signal  
361 transduction and actin cytoskeleton organization, postnatal day 6 (P6) endothelium was  
362 enriched for processes such as adhesion, cell surface receptor signaling, locomotion  
363 and migration. Adult-enriched CNS genes featured GO terms found at E12 and P6,  
364 such as cell surface receptor signaling pathway and biological cell adhesion, as well as  
365 novel terms related to WNT signaling and enzyme-linked receptor protein signaling  
366 (Figure 4B, Supplemental Table 4).

367       Next, at each timepoint we examined the most enriched transcription factor DNA-  
368 binding motifs and rank ordered them by their mRNA expression level (1=highest,

369 20=lowest) (Figure 4C). At E12.5, motifs for several ETS family transcription factors  
370 (ELF4, ELF5, ELK3, ELK4, etc.) were enriched in the cerebrovasculature, with ETS1,  
371 ERG, and FLI1 among the top 5 transcription factor motifs, as ranked by actual gene  
372 expression. FOXF1 and SOX17 rounded out the top 5, while other ETS, FOX and SOX  
373 family members made up the top 20, as did TEAD1 and JUN. At P6, ETS1 moved out of  
374 the top 5, and FLI1 motif enrichment was substantially decreased, while EHF, ELF3,  
375 ELF5, ERG and FOXL2 were the top 5 most enriched motifs and highly expressed  
376 transcription factors in the early postnatal CNS endothelium. In the adult CNS  
377 endothelium, FOXL2 was the most abundantly expressed of the over-represented  
378 transcription factor motifs, followed by FOXF1, ETS1, FLI1, and LEF1. LEF1 and TCF3,  
379 known regulators of canonical WNT signaling involved in blood brain barrier maturation,  
380 as well as PPARA, FOXP1, FOXO1, FOXM1, KLF1, KLF5, and NR2F1 were among the  
381 notable adult-enriched TFs (Figure 4C). Similar analysis of motif usage and transcription  
382 factor enrichment within the endothelium during development was performed for the  
383 heart (Supplemental Figure 2), liver (Supplemental Figure 3), lung (Supplemental Figure  
384 4) and kidney (Supplemental Figure 5).

385 We then examined accessible, brain-specific regions of open chromatin within (or  
386 nearby) genes that were differentially expressed in E12.5, P6 or Adult CNS endothelium  
387 for these same transcription factor DNA binding motifs. *Adrenomedullin* (*Adm*), enriched  
388 in tip cells of the developing brain vasculature (Sabbagh et al., 2018), contains an  
389 accessible chromatin region in E12.5 at the zenith of *Adm* expression peaks (Figure 4D,  
390 left). Similarly, expression of *Tenascin-c* (*Tnc*), whose gene product is involved in cell  
391 adhesion (Chiquet-Ehrismann and Tucker, 2011), peaks at P6 and features two regions

392 of open chromatin at this stage that are lost in the adult endothelium (Figure 4D,  
393 middle). Finally, *Slc9a2*, which encodes a Na/H exchanger present in brain endothelium  
394 (Lam et al., 2009), contains three regions of open chromatin upstream of its promoter  
395 that are specifically enriched in the adult endothelium (Figure 4D, right). All 3 genes  
396 contain uniquely accessible chromatin with predicted DNA binding sites for various  
397 members of the top 20 most enriched transcription factors in the brain (Figure 4D).

398

399 *Exploring Blood Brain Barrier Development at a Single Cell Resolution:* Following our  
400 identification of transcription factors and their DNA binding motifs enriched in the brain  
401 endothelium by ATAC-Seq, we were interested in how these same transcriptional  
402 regulators, and their targets, changed during maturation of the CNS endothelium at a  
403 more granular level. CD31<sup>+</sup> endothelial cells from whole brains (E9.5, E12.5 and E16.5),  
404 or only the cortex (P8 and Adult), were isolated by Magnetic Activated Cell Sorting  
405 (MACS) and then processed for single cell RNA-seq (scRNA-seq) (Figure 5A). After  
406 filtering (see methods), all cells isolated from E9.5 (6,039), E12.5 (6,822), E16.5  
407 (3,358), P8 (4,048), and adult (2,723) brain were examined (Figure 5B-D, Supplemental  
408 Figure 6). As expected, dimensionality reduction and visualization of these scRNA-seq  
409 data by uniform manifold approximation and projection (UMAP) revealed a fairly uniform  
410 distribution of cells between samples (Hao et al., 2021; Melville, 2020) (Figure 5B). Cell  
411 identities were assigned based on the expression of well-characterized marker genes,  
412 with astrocyte, microglia, mural, and macrophage populations identified within our brain  
413 datasets (Figure 5C, Supplemental Figure 6B-D, Supplemental Table 5). Endothelial  
414 cell clusters, expressing characteristic EC transcripts such as *Cdh5*, were evident at all

415 stages examined, validating the CD31<sup>+</sup> MACS enrichment (~79% of the 22,990  
416 sequenced cells were endothelial cells) (Figure 5D).

417 To define gene expression changes within brain endothelial cells over time, the  
418 endothelial cluster was extracted and further analyzed. Differential gene expression  
419 signatures were evident between the various time points (Figure 5E, Supplemental  
420 Table 5). *Macrophage migration inhibitory factor (Mif)*, an inflammatory cytokine with  
421 chemokine functions that has been implicated in angiogenesis (Amin et al., 2003), was  
422 robustly expressed in E9.5 brain endothelial cells, but markedly downregulated in later  
423 stages. *Marcks11*, a gene involved in blood vessel shape and size (Kondrychyn et al.,  
424 2020), was the most differentially upregulated gene in the E12.5 brain endothelium (*Mif*  
425 and *Marcks11* are labeled in purple, Figure 5E), while the amino acid transporter *solute*  
426 *carrier transporter 7a5 (Slc7a5)* (Tarlungeanu et al., 2016), as well as other blood brain  
427 barrier markers (denoted in red), initiated expression at E16.5 when blood brain barrier  
428 formation begins (Ben-Zvi et al., 2014; Hupe et al., 2017). Conversely, expression of  
429 *plasmalemma vesicle-associated protein (Pvlap/Mecca 32)*, a pan-endothelial marker  
430 that is lost in the mature BBB endothelium (Benz et al., 2019; Guo et al., 2016), was  
431 dramatically decreased after E12.5. *Major facilitator super family domain containing 2a*  
432 (*Mfsd2a*), which encodes a lipid transporter required for proper blood-brain barrier  
433 development (Ben-Zvi et al., 2014; Wong and Silver, 2020), and *solute carrier organic*  
434 *anion transporter family member 1a4 (Slco1a4)*, an organic anion transported recently  
435 studied as a potential target for drug delivery to the brain (Akanuma et al., 2013; Ose et  
436 al., 2010), are both enriched E16.5 through adult brain endothelium.

437           Next, we performed pseudotemporal ordering of individual CNS ECs to further  
438 characterize their developmental trajectories (Qiu et al., 2017a; Qiu et al., 2017b;  
439 Trapnell et al., 2014) (Figure 5F). Genes involved in mitosis, cell division and  
440 proliferation, such as *Aurora Kinase B (Aurkb)* (Bischoff and Plowman, 1999; Giet and  
441 Prigent, 1999), *Kinesin superfamily protein 4 (Kif4)* (Hu et al., 2011), and *Marker of*  
442 *proliferation Ki-67 (Mki67)* (Booth et al., 2014), were markedly elevated in early brain  
443 development, when angiogenesis is rapidly expanding the vascular network.  
444 Conversely, at the other end of the pseudo time spectrum, genes involved in blood brain  
445 barrier maturation, such as the tight junction encoding genes *Claudin 5 (Cldn5)* (Nitta et  
446 al., 2003) and *Occludin (Ocln)* (Argaw et al., 2009), as well as the transporters *Mfsd2a*  
447 (Ben-Zvi et al., 2014; Wong and Silver, 2020) and *Glut1 (Slc2a1)* (Veys et al., 2020)  
448 initiated at E16.5 and peaked in the P8 and adult endothelium (Figure 5G).

449

#### 450 Identification of Gene Regulatory Networks Involved in Brain Endothelial Development:

451 To identify potential transcriptional regulators of cerebrovascular development and  
452 maturation we utilized Single-Cell rEgulatory Network Inference and Clustering  
453 (SCENIC) (Aibar et al., 2017). By correlating transcription factor expression within  
454 individual endothelial cells along with expression of their presumptive targets, SCENIC  
455 predicts active gene regulatory networks (GRNs). First, sets of genes that are co-  
456 expressed with transcription factors are identified as a module. Then, putative direct-  
457 binding targets within a module are examined for the presence of cis-regulatory motifs  
458 of these co-expressed transcription factors to generate a “regulon”, while indirect targets  
459 are removed. This process is repeated for each transcription factor, and its putative co-



460 expressed targets, expressed within each cell. Finally, cells with similarly active  
461 regulons (or GRNs), are then grouped together (Figure 6A).

462 Using SCENIC, we identified 3 distinct endothelial clusters based upon regulon  
463 activity (Figure 6B). The first cluster of regulons, including SOX11 (106 genes), PLAGL1  
464 (79 genes) and E2F1 (314 genes), are enriched primarily in the E9.5 and E12.5 brain  
465 endothelium. SOX11 regulates vascular development and is active during pathological  
466 angiogenesis (Palomero et al., 2014; Schmitt et al., 2013), while PLAGL1 controls early  
467 developmental angiogenesis (Starks et al., 2020), and E2F1 modulates vascular  
468 endothelial growth factor (VEGF) expression (Qin et al., 2006). Visualizing the direct  
469 transcriptional targets of SOX11, PLAGL1, and E2F1 in context of CNS EC brain  
470 maturation using pseudotime analysis revealed that these putative gene regulatory  
471 networks were largely upregulated in immature endothelia (e.g. E9.5), while GO  
472 analysis showed their target genes are involved in DNA replication and the cell cycle  
473 (Figure 6C, D). The second cluster of regulons identified by SCENIC were active  
474 primarily in the E16.5, P8 and adult CNS endothelium, including JUN (33 genes),  
475 FOXF1 (110 genes) and FOXQ1 (236 genes). *Jun* has been implicated in tip cell  
476 specification and tube formation during angiogenesis (Keisuke et al., 2020; Licht et al.,  
477 2006; Yoshitomi et al., 2021). *Foxf1* is critical for endothelial barrier function in the lung,  
478 but is not required for blood brain barrier maintenance (Cai et al., 2016), while *Foxq1* is  
479 enriched in the developing brain endothelium (Hupe et al., 2017). Gene ontology  
480 predicts that transcripts in this second cluster are involved in processes such as the  
481 regulation of gene expression, system development and cell proliferation. The third and  
482 last cluster identified by SCENIC contained regulons active in the P8 and the adult CNS

483 endothelium, including TCF4 (10 genes), LEF1 (43 genes) and FOXP1 (532 genes).  
484 *Lef1*, which encodes an obligate binding partner of  $\beta$ -catenin in the nucleus, as well as  
485 *Tcf4* (*Transcription factor 4*) both act downstream of canonical WNT signaling to govern  
486 blood brain barrier function (Wang et al., 2019; Zhou et al., 2014). GO analysis shows  
487 target genes downstream of these adult enriched transcription factors were involved in  
488 macromolecule modification, regulation of cellular metabolic processes, and WNT  
489 signaling (Figure 6C-D). Furthermore, some target genes were present in more than  
490 one regulon, suggesting they may function as critical nodes in brain endothelial  
491 development (Supplemental Figure 7, full list in Supplemental Table 6). Notably, many  
492 of the GRNs identified by SCENIC featured enriched DNA binding motifs and  
493 upregulated gene expression for transcription factors identified in our ATAC-seq and  
494 RNA-seq analysis, such as JUN, FOXP1, and LEF1 (Figure 4C). Interestingly, *Nuclear*  
495 *Receptor Subfamily 3 group C member 1* (*Nr3c1*), which encodes a glucocorticoid  
496 receptor and is involved in the regulation of WNT/ $\beta$ -catenin pathway (Liu et al., 2021)  
497 and *albumin D-binding protein* (*Dbp*), a proline amino-acid-rich domain basic leucine  
498 zipper (PAR bZip) transcription factor involved in circadian rhythm control in the blood  
499 brain barrier (Franken et al., 2000; Pulido et al., 2020), also showed an increase in  
500 regulon activity (Supplemental Figure 8A-C).

501

502 *Cell Type Specific Regulon Activity in the Cerebrovasculature: An advantage of scRNA-*  
503 *Seq* is that it enables the identification of distinct endothelial cell types based on marker  
504 gene expression, allowing one to distinguish between various endothelial identities,  
505 such as arterial, capillary-arterial, capillary-venous, venous, mitotic and tip cells

506 (Sabbagh et al., 2018; Vanlandewijck et al., 2018). Given the dynamic nature of LEF1  
507 and FOXP1 regulon activity within the brain vasculature during development, we  
508 wondered if these gene regulatory networks were uniformly active across all vessel  
509 types (Figure 7A). To detect changes in regulon activity at different developmental  
510 timepoints, we first subclustered E12.5 and adult brain ECs using defined markers for  
511 these different vessel identities (e.g. arterial, capillary vein, capillary artery, venous, tip  
512 cell, and mitotic) (Sabbagh et al., 2018). Both E12.5 and adult CNS ECs contained cells  
513 from each unique vessel identity (Figure 7B-E). Interestingly, whereas the LEF1 regulon  
514 was enriched in tip cells and capillaries at E12.5, it expanded to encompass all vessel  
515 types in the adult brain (Figure 7F). Conversely, the FOXP1 regulon was selectively  
516 active in arterial cells at E12.5, but it also expanded to include all vessel types in the  
517 adult brain (Figure 7G).

518

519 *Neurovascular Unit Interactions Change During Blood Brain Barrier Maturation: The*  
520 blood brain barrier is part of the neurovascular unit (NVU), which is composed of  
521 neurons, mural cells (i.e. smooth muscle, pericytes), glia and astrocytes that surround  
522 and interface with the cerebral endothelium (Schaeffer and Iadecola, 2021). Using  
523 NicheNET (Browaeys et al., 2020), we next identified ligands expressed in non-EC cells  
524 of the NVU within our dataset, as well as their target genes expressed in the CNS  
525 endothelium, to determine whether these ligand-target interactions are driving activation  
526 of the regulons identified by SCENIC within the brain vasculature. We examined only  
527 genes that were significantly upregulated in the adult endothelium compared to the  
528 embryonic day 9.5 (E9.5) endothelium, and with endothelial cells designated as the

529 signal receiving cells (receptors and downstream effectors), with other cell types of the  
530 NVU (microglia, pericytes and mural cells) being defined as signal sending cells. From  
531 this analysis we identified the upregulation of cell adhesion molecules in the  
532 endothelium, such as *catenin delta 1 (Ctnnd1, P120)* (Anney et al., 2021)  
533 (Supplemental Figure 9A). Expression of *Ctnnd1*, along with WNT signaling regulated  
534 genes such as *Cyclin dependent kinase inhibitor 1A (Cdkn1a)* (Nayak et al., 2018),  
535 *Cyclin D1 (Ccnd1)* (Shtutman et al., 1999; Tetsu and McCormick, 1999), *Prothymosin*  
536 *Alpha (Ptma)* (Lin and Chao, 2015), and *Catenin beta-1/β-catenin (Ctnnb1)* were  
537 predicted to be induced by pericyte-mediated presentation of the ligand Cadherin 2  
538 (CDH2) to the endothelium (Ortiz et al., 2015; Zheng et al., 2016). Furthermore, pericyte  
539 CDH2 can also induce endothelial expression of *Lef1* (Soh et al., 2014) and the  
540 canonical Wnt target, *Axin2* (Jho et al., 2002). Importantly, endothelial expression of  
541 VE-Cadherin (*Cdh5*) can also induce *Lef1* (Birdsey et al., 2015). Genes involved in  
542 vascular maintenance, such as *Rad51*, are potentially driven by SMC expression of  
543 *Integrin beta 1 (Itgb1)* (Ahmed et al., 2018; Vattulainen-Collanus et al., 2018)  
544 (Supplemental Figure 9A).

545         After identifying the putative downstream effectors within endothelial cells  
546 induced by ligands expressed in neighboring cell types of the NVU, we next focused on  
547 the ligands presented by the endothelium and their potential receptors in pericytes,  
548 which stabilize capillary vessels in the brain (Supplemental Figure 9B). Using CCLinx  
549 (version 0.5), we found that the adult cerebral endothelium is enriched for chemokines  
550 that regulate leukocyte migration and maintain homeostasis, such as *Cxcl12*, while its  
551 receptor, *Ackr3/Cxcr7*, is enriched in pericytes (Boldajipour et al., 2008; Williams et al.,

2014). Similarly, adult brain ECs express *Pdgfb*, while its cognate receptor, *Pdgfrb*, was enriched in adult pericytes (Abramsson et al., 2007; Gaengel et al., 2009). An EC to pericyte interaction was also noted for *Amyloid precursor protein* (*App*) and *Vitronectin* (*Vtn*) (Calero et al., 2012). Conversely, the adult brain endothelium featured decreased expression of *Macrophage migration inhibitory factor* (*Mif*), which is known to reduce pericyte contractility (Pellowe et al., 2019), while pericytes decreased expression of multiple potential MIF receptors, including *Transferrin Receptor 1* (*Tfrc*, *Cd71*) and *Integrin  $\alpha 4$*  (*Itga4*). Collectively, these data show cellular communication within the NVU can be readily inferred from scRNA-seq data within the developing murine brain, as both known and novel interactions were evident between ECs and mural cells.

*Identification of Evolutionarily Conserved Regions of Open Chromatin:* To investigate if the transcription factor networks we identified in the murine brain play an analogous, conserved role in humans, we turned to an *in vitro* model of the human brain vasculature: hCMEC/D3 cells (Weksler et al., 2013). Using Omni-ATAC-seq (Corces et al., 2017), regions of open chromatin were identified in these cultured human brain endothelial cells and then compared to accessible regions within the P8 and adult murine brain. Of the 94,197 regions of open chromatin identified in human brain microvascular endothelial cells, 15,131 were conserved in the mouse genome (mm10). Out of these evolutionarily conserved regions, 314 overlapped with regions that were uniquely accessible within the adult murine brain endothelium (Figure 8A, Supplemental Table 7), and the most enriched transcription factor DNA binding motifs within these conserved, accessible regions was determined using HOMER (Figure 8B). Notably, common core endothelial TF motifs, such as ETS DNA binding sites, did not emerge at

575 the top of this list as this analysis focused on regions and motifs that were enriched  
576 specifically within the endothelium of the postnatal and adult brain. Transcription factor  
577 motifs that were evolutionarily conserved in the open chromatin of the adult human and  
578 murine cerebral endothelium were FOXM1, FOXL2, FOXA1, FOXF1, and BATF.  
579 Interestingly, conserved regions of open chromatin that mapped to genes expressed in  
580 both human and murine brain vasculature (via GREAT and RNA-Seq) were involved in  
581 processes such as vascular development, cell communication, and WNT signaling  
582 (Figure 8C). Examples of these evolutionarily conserved, putative regulatory elements  
583 in the adult cerebral endothelium can be found within the first intron of *Slc31a1* (*Solute*  
584 *Carrier Family 31 Member 1*), which contains motifs for TCF4, LEF1 and FOXO3, and in  
585 a region proximal to *Mfsd2a* (*Major facilitator superfamily domain-containing protein 2*),  
586 that has motifs for TCF4, LEF1 and ETS (Figure 8D). *Mfsd2a* encodes for a critical lipid  
587 transporter that is enriched in the brain endothelium (Andreone et al., 2017; Ben-Zvi et  
588 al., 2014; Nguyen et al., 2014; O'Brown et al., 2019), and loss of WNT signaling either in  
589 receptor (*Lrp5<sup>-/-</sup>*) or ligand (*Ndp<sup>+/+</sup>*) mice downregulates *Mfsd2a* expression and  
590 increases transcytosis and BBB breakdown in mice (Wang et al., 2020).

591

592

593

594

595

596

597

598 **DISCUSSION**

599 Herein, we have profiled the accessible chromatin and gene expression signatures of  
600 the embryonic, postnatal, and adult brain and heart, as well as the postnatal and adult  
601 retina, liver, kidney, and lung endothelium. By establishing a lexicon of common,  
602 accessible regions of open chromatin present within the endothelium of these six  
603 organs, across developmental time, we have identified a core set of enriched  
604 transcription factor DNA binding motifs common to all endothelial cells, regardless of  
605 their origin. Additionally, we extend these observations to identify accessible regions in  
606 the genome that are enriched in specific organs, along with the possible transcription  
607 factors that act on these putative regulatory elements to give rise to the functional  
608 heterogeneity evident within these different vascular beds (Sabbagh et al., 2018).  
609 Moreover, using single cell transcriptomic approaches we interrogate the gene  
610 regulatory networks governing development and maturation of the cerebrovasculature  
611 at the single cell level. Finally, we demonstrate that the regulatory regions, and the  
612 transcription factor motifs within them that we identified in the adult murine CNS  
613 endothelium are evolutionary conserved in humans.

614       Significantly, within these accessible regions of open chromatin within the  
615 endothelium, the DNA binding motif for the ETS family of transcription factors are the  
616 most commonly occurring TF binding site, regardless of organ identity. This was  
617 expected, given the key functions ETS TFs play in endothelial specification, vessel  
618 growth, and angiogenesis (Asano et al., 2010; Birdsey et al., 2015; De Val and Black,  
619 2009; Palikuqi et al., 2020). Other common, core motifs present in the endothelium of all  
620 organs were those of the SOX transcription factor family (Chiang et al., 2017; Yao et al.,

621 2019b). Critically, organ-specific signatures also emerged, as analysis of open  
622 chromatin unique to the vasculature of each organ identified an array of transcription  
623 factor binding motifs enriched to each tissue, such as GATA4 in the liver, and NFAT in  
624 the heart. While we focused our attention on the cerebrovasculature, this catalogue of  
625 chromatin landscapes and gene expression signatures of the endothelium of different  
626 organs is a valuable resource that can be further interrogated to generate new  
627 hypotheses regarding endothelial specialization, maturation, and homeostasis.

628         The mature brain vasculature features unique characteristics, such as extensive  
629 cell-cell junctions, and selective permeability (Obermeier et al., 2013). This  
630 specialization, along with the need to define the transcriptional networks governing the  
631 establishment and maintenance of the blood brain barrier, warranted further  
632 investigation at the single cell level over developmental time. Examination of 18,827  
633 single brain endothelial cell transcriptomes, across 5 distinct developmental stages,  
634 revealed a stark transition from a mitotic, and proliferative signature at E9.5, to a  
635 homeostatic endothelium featuring a rich repertoire of channels and transporters  
636 evident in the adult brain. This was expected, as the predominant mechanism of early  
637 blood vessel growth within the brain is angiogenesis (proliferation, migration, sprouting),  
638 while growth begins to wane as the existing capillaries and larger diameter vessels  
639 mature and remodel to establish the blood brain barrier from E16.5 through postnatal  
640 development. Critically, using scRNA-seq we identified novel GRNs in the early brain,  
641 such as SOX11, PLAG1, and E2F1, while also showing confirming our ATAC-seq and  
642 RNA-seq results which suggested that JUN, FOXF1, and FOXQ1 control maturation of  
643 the brain endothelium. Critically, AP-1 transcription factors, such as JUNB, control



644 vascular development in the retina (Engelbrecht et al., 2020; Keisuke et al., 2020).  
645 Whether other TFs and their GRNs identified herein, such as FOXF1, interact with the  
646 WNT signaling pathway to regulate BBB maturation remains unknown (Ustiyana et al.,  
647 2018). Finally, our single cell data also identified robust LEF1, NR3C1, and DBP  
648 regulons specific to the adult brain endothelium. Identification of a LEF1 GRN within the  
649 adult brain vasculature consistent with recent studies demonstrating a critical  
650 requirement for *Lef1* in blood brain barrier maturation (Daneman et al., 2009; Mike et  
651 al., 2017; Roudnicky et al., 2020; Zhou et al., 2014). However, our temporal and cell  
652 type specific analysis revealed that a LEF1 GRN is, in fact, active in early tip and  
653 capillary cells of the early cerebral endothelium, and it then expands during  
654 development to become upregulated in all vessel types within the postnatal brain. A  
655 similar pattern, albeit being confined to the early arterial endothelium, was evident for  
656 the FOXP1 GRN. While there are fewer links in the current literature between either  
657 DBP or NR3C1 and the CNS vasculature, reports do suggest *Dbp* and its transcriptional  
658 targets control circadian rhythms within the CNS (Lopez-Molina et al., 1997; Pulido et  
659 al., 2020), and some studies suggest NR3C1 plays a role in vascular inflammation and  
660 aneurysm (Al Argan et al., 2018; Goodwin et al., 2015). Of interest will be future studies  
661 of these same GRNs in neurovascular diseases accompanied with BBB disruption.

662 Finally, by performing a cross-species analysis to another vertebrate, our data  
663 demonstrate the major DNA binding motifs found in the murine adult cerebrovasculature  
664 were also present within a human cell culture model of the blood brain barrier. Similar to  
665 what was observed in our murine dataset, the genes linked to these evolutionarily  
666 conserved, accessible chromatin regions in the human brain endothelium were also

667 involved in blood vessel morphogenesis and WNT signaling. These conserved regions  
668 are of great interest, and future studies will interrogate the sufficiency and necessity of  
669 these potential brain specific enhancers to modulate gene expression *in vivo*.

670

671 Limitations of the Present Study: Changes in open chromatin do not directly translate to  
672 changes in gene expression. Furthermore, the chromatin surrounding most proximal  
673 promoters are likely in an accessible state in most situations, as the transcriptional  
674 status of many loci is not determined by differential accessibility, per se, but by  
675 differential recruitment of the transcriptional machinery, or even post-translation  
676 modification of already engaged protein complexes (as occurs in pause-release of the  
677 Pol II transcriptional machinery at the proximal promoter) (Adelman and Lis, 2012; Fish  
678 et al., 2017; Jonkers and Lis, 2015; Narita et al., 2021). A technical limitation of our work  
679 is the methods and analysis used herein infer enhancers of target genes, rather than  
680 measure direct looping or physical contacts (e.g. as in chromatin conformation capture  
681 techniques). Moreover, these putative enhancers, as well as the novel gene regulatory  
682 networks identified by scRNA-seq, have not been functionally validated. Critically, bulk  
683 nuclear RNA-Seq yielded less robust transcript number than traditional bulk whole cell  
684 RNA-Seq. Whether this was due to loss of cytoplasmic RNA, or inadequate input  
685 material, is unknown. Finally, our *in vitro* chromatin accessibility data from cultured  
686 human microvascular endothelial cells likely does not fully reflect the transcriptional  
687 complexity of the intact adult human brain.

688

689

690 Conclusion

691 In summary, we present a comprehensive catalogue of the chromatin landscape within  
692 the endothelium of multiple organs of the developing and adult mouse. This data is  
693 augmented by a granular dissection of the development and maturation of the brain  
694 endothelium, and the gene regulatory networks acting at the level of single cells within  
695 this organ. Finally, we demonstrate that many of these accessible regions of open  
696 chromatin, and the DNA binding motifs contained within these regions, are well  
697 conserved between mice and humans. By studying the unique chromatin landscape of  
698 healthy endothelial cells throughout the organs of the body, this resource will guide  
699 future studies aimed at experimentally manipulating these unique populations, and it  
700 suggests novel targets for promoting engraftment of new endothelium within each  
701 organ.

702

703

704

705

706

707

708

709

710

711

712

713 **MATERIAL AND METHODS**

714

715 **Mice:**

716 All mouse protocols were approved by the Institutional Animal Care and Use Committee  
717 (IACUC) at Baylor College of Medicine. For all experiments, noon on the day a vaginal  
718 plug was discovered was considered embryonic day 0.5, the day of birth was  
719 considered P0, and all adult mice were 8 weeks of age.

720

721 ***Genotyping and mice used:***

722 *Cdh5(PAC)-CreERT2* mice (MGI #: 3848982) were from Ralf Adams. *Rosa26-Sun1-*  
723 *sfGFP-6xMyc* (e.g. *R26<sup>Sun1GFP</sup>*) (MGI #: 5443817) were purchased from Jax. Genotyping  
724 for all alleles was performed by PCR using gene specific primers. Please see  
725 Supplemental Materials and Methods for more details.

726

727 **Murine Endothelial Nuclear isolations:**

728 For embryonic analysis, tamoxifen (0.015 mg/kg bodyweight) was administered to  
729 pregnant dams by intraperitoneal (i.p.) injection at E10.5 and embryos were collected at  
730 E12.5. For postnatal tissues, tamoxifen (0.015 mg/kg bodyweight) was administered by  
731 subcutaneous injection at P1 and P3, and tissues were collected at P7. For adult  
732 experiments, tamoxifen (0.015 mg/kg bodyweight) was administered by i.p. injection 7  
733 days prior to tissue isolation. In all cases, after gross dissection, GFP expression within  
734 the vasculature of each tissue of interest (or embryo) was confirmed by direct  
735 immunofluorescence for each sample collected. GFP negative samples were not

736 processed further. Nuclear isolation was performed according to Mo et. al (Mo et al.,  
737 2015). Briefly, fresh tissue was harvested on ice in Buffer HB++ composed of 0.25 M  
738 sucrose, 25 mM KCl, 5 mM MgCl<sub>2</sub>, 20 mM Tricine-KOH, pH 7.8 with protease inhibitors  
739 (Roche/Sigma Cat. #11873580001), 1 mM DTT (Sigma D0632), 0.15 mM Spermine  
740 (Sigma S1141), 0.5 mM Spermidine (Sigma S2501), and RNase inhibitors (Promega  
741 N2611) and immediately dissected and minced into 1 mm-by-1 mm portions with curved  
742 scissors. Tissue was transferred along 1ml of HB++ in a chilled Eppendorf tube in ice  
743 and homogenized using Bio-gen Series PRO200 homogenizer. Short bursts of ~5-8  
744 seconds were done to prevent overheating. Once no large pieces were observed, the  
745 tissue was transferred to large clearance dounce homogenizer "A" (7ml, Kontes Glass  
746 Company) and 4 mL of HB++ was added. Tissue was homogenized with 20 strokes and  
747 transferred to small clearance homogenizer "B", 320 ul of 5% IGEPAL CA-630++ in  
748 HB++ was added and dounced with the tight pestle 20 more times slowly to avoid  
749 creating bubbles and disrupting cell membranes. The homogenate was then strained  
750 using a 40 µm cell strainer into a 50 mL conical tube. 5 mL of working solution of 5  
751 volumes of Optiprep solution (Sigma, D1556) and one volume of diluent (150 mM KCl,  
752 30 mM MgCl<sub>2</sub>, 120 mM Tricine-KOH, pH 7.8 in water) was added and homogenized by  
753 inversion and poured into an empty pre-chilled 30 mL Corex tube. Once all samples  
754 were ready, using a pipette aid, the tip was placed just above the bottom surface of the  
755 Corex tube, and sample was slowly underlying with 7.5 mL of the 30% and then 4 mL of  
756 the 40% iodixanol++ solutions (diluted with buffer HB). Nuclei were then isolated by  
757 density gradient centrifugation with optiprep density gradient medium. Nuclei were  
758 collected from the 30-40% interface and then pre-cleared with Protein-G Dynabeads

759 (Life technologies, 10003D). A portion of these nuclei were held back for use as input  
760 samples. Next, GFP<sup>+</sup> nuclei were immunoprecipitated with an anti-EGFP antibody  
761 (ABfinity Rabbit monoclonal anti-GFP antibody; 0.2 mg/mL) for 40 minutes at 4°C with  
762 gentle agitation, followed by binding to Protein-G Dynabeads (Invitrogen, 10003D) for  
763 20 minutes hours at 4°C to enrich for endothelial cell nuclei. Isolated nuclei were filtered  
764 using 20 μm Celltrics filter (Sysmex #04-004-2326).

765        Specific amounts of tissue and yields of nuclei from each tissue are listed below.  
766 For adult hearts, 4 hearts were used per INTACT experiment with 80% of the tissue  
767 processed resulting in a total of 1.07x10<sup>6</sup> isolated nuclei. For adult lungs, 2 lungs per  
768 INTACT experiment were used with 60% of the tissue processed and resulting in a total  
769 of 1.1x10<sup>6</sup> isolated nuclei. 10 adult retinas were used per INTACT experiment resulting  
770 in 50,000 isolated nuclei. 1 adult brain was used per INTACT experiment with resulting  
771 in 1.45 x10<sup>6</sup> isolated nuclei. 1 adult liver was used per INTACT experiment with 50% of  
772 the tissue processed resulting in 5 x10<sup>5</sup> isolated nuclei. 4 adult kidneys were used per  
773 INTACT experiment with 60% of the tissue processed and resulting in 8.5x10<sup>5</sup> isolated  
774 nuclei. 8 P7 hearts were used per INTACT experiment resulting in 9x10<sup>5</sup> isolated nuclei.  
775 4 P7 lungs were used per INTACT experiment resulting in 395,000 isolated nuclei. 16  
776 P7 retinas were used per INTACT experiment resulting in 85,000 isolated nuclei. 6 P7  
777 brains were used per INTACT experiment with 60% of the tissue processed and  
778 resulting in 1x10<sup>6</sup> isolated nuclei. 8, P7 livers were used per INTACT experiment with  
779 60% of the tissue processed and 6.7x10<sup>5</sup> isolated nuclei. 8, P7 Kidneys were used per  
780 INTACT experiment resulting in 1.2x10<sup>6</sup> isolated nuclei. 5 E12.5 trunks per INTACT  
781 experiment were used per INTACT experiment resulting in 1.0 x10<sup>6</sup> isolated nuclei. 5

782 E12.5 brains were used per INTACT experiment resulting in  $1.5 \times 10^5$  isolated nuclei. 5

783 E12.5 hearts were used per INTACT experiment resulting in 47,000 isolated nuclei.

784 Each isolation was performed at least twice.

785

786 **Assay for Transposase-Accessible Chromatin with high throughput sequencing**

787 **(ATAC-seq):**

788 Approximately 50,000 bead-bound EGFP<sup>+</sup> and 50,000 input nuclei from murine tissues

789 were used as input for ATAC-seq. ATAC-seq libraries for murine endothelial cells were

790 processed as previously described (Buenrostro et al., 2015) and libraries were

791 generated using the Nextera DNA Sample Preparation Kit (Illumina, FC-121-1030). The

792 quality of purified DNA libraries was checked by Agilent High Sensitivity DNA kit (Agilent

793 Technologies). Paired-end, 2 x 75 bp sequencing was performed on an Illumina

794 Nextseq 500 instrument. Reads were mapped to the mm10 version of the mouse

795 genome using Bowtie2 with default paired-end settings (Langmead and Salzberg,

796 2012). Mitochondrial reads, reads with a MAPQ < 10, and reads which did not align to

797 the reference genome were removed using Samtools (version 1.13) (Danecek et al.,

798 2021). Duplicated reads were then removed with Picard MarkDuplicates (Institute,

799 2019). Peak calling was carried out with MACS2 (callpeak --nomodel --broad)

800 (v2.2.7.1)(Zhang et al., 2008). Diffbind (version 3.2) (Ross-Innes et al., 2012; Stark R,

801 2011) was used to import peaksets (min.overlap= 0.66) into RStudio Server (version

802 1.4.1717, <https://www.rstudio.com>) using R (version 4.1, (Team, 4.1). The dba.blacklist

803 function was used to filter out peaks that overlap with the ENCODE blacklist.

804 Differentially accessible regions between the endothelium and the input nuclei of each

805 organ were extracted using DESeq2 (version 1.32.0) (Love et al., 2014) with <p-value  
806 0.5 and >1 fold change difference. Endothelial-enriched peaks from each organ were  
807 compared using the mergepeaks function in Homer (version 4.11) (Heinz et al., 2010).  
808 Peaks present in all organs were used for analysis in Figure 2. Peaks present in single  
809 organs were used for analysis in Figure 3 and Supplemental Figures 3-6. Motif  
810 enrichment analysis was conducted with findMotifsGenome and enrichment graphed as  
811 previously described (Liu et al., 2019). Graphs for individual motif distance from peaks  
812 were created using annotatePeaks in Homer and presented in an enrichment plot (Liu  
813 et al., 2019). Gene ontology analysis was done using GREAT (version 4.0.4) (McLean  
814 et al., 2010).

815

#### 816 **Nuclear RNA-seq:**

817 In parallel to our ATAC-seq experiments, all remaining bead-bound EGFP<sup>+</sup> nuclei were  
818 processed for RNA extraction using the RNeasy Plus Micro kit (Qiagen). Nuclear RNA-  
819 seq libraries were constructed with the Stranded RNA-seq Kit with Ribo Erase (Kapa  
820 Biosystems, KK8484) with custom Y-shaped adapters. Paired-end 2 x 75 bp NSQ  
821 500/550 Hi Output KT v2.5 - 75 CYS (Illumina, 20024906) was performed for RNA-seq  
822 libraries on an Illumina Nextseq 500 instrument. Reads were first mapped to the mouse  
823 genome (mm10) using Salmon (version 1.5.1) (Patro et al., 2017). Transcript level  
824 quantification was then imported using txtimport (version 1.20.0) (Soneson et al., 2015)  
825 and analyzed using DESeq2 (Love et al., 2014). Differentially expressed genes between  
826 the endothelial and input nuclei were defined as those transcripts with an expression



827  $\log_2$ fold-change >0.5 and Benjamini-Hochberg adjusted p-value (q-value) < 0.1.

828 Volcano plots were created using EnhancedVolcano (version 1.10.0) (Blighe K, 2021).

829

### 830 **Magnetic Activated Cell Sorting for Murine Single Cell RNA-Sequencing:**

831 Brain tissue was processed for CD31 MACS with slight variations depending on the

832 time point analyzed. For embryonic brains (E9.5, E12.5, E16.5), embryos were

833 harvested in ice-cold Buffer HBSS++ (HBSS plus FBS, pen/strep, and HEPES).

834 Dissected brains were placed in 250  $\mu$ L of Collagenase (1 mg/mL) and placed at 37°C

835 for 15 minutes. Tissue was pipetted up and down every two minutes, first with a P1000,

836 then with a P200, until few to no clumps of tissue were visible. For P8 and adult brain,

837 the cortex was dissected, and cells were dissociated using the neural tissue dissociation

838 kit P (Miltenyi, 130-092-628). For all time points, the cell suspension was pelleted (5

839 min, 800 x g), then washed two times with PBS, and then resuspended in 180  $\mu$ L MACS

840 PEB buffer (phosphate-buffered saline (PBS), pH 7.2, 0.5% bovine serum albumin

841 (BSA), and 2 mM EDTA. The cell suspension was then incubated for 15 minutes with 20

842  $\mu$ L of anti-CD31 MicroBeads (Miltenyibiotec, Cat. No. 130-097-418) at 4°C. Cells were

843 then washed with 1 mL of PEB buffer, centrifuged at 300 x g for 5 minutes, and applied

844 to an MS Column (Miltenyi, 130-042-201) on a magnetic stand. After three consecutive

845 washes on a magnetic stand with PEB, cells were collected in 0.5 mL of PEB and then

846 pelleted at 300 x g for 10 minutes at 4°C. Cells were then resuspended in 1x PBS at a

847 concentration of 50,000 cells per 50  $\mu$ L, with a viability  $\geq$  90% as determined by trypan

848 blue staining and then used for downstream applications (see below).

849

850 **Single Cell RNA-Sequencing of Murine Brain Cells:**

851 scRNA-Seq libraries were generated using the 10x Chromium Single Cell 3' v2 reagent  
852 kit, according to the manufacturer's instructions, and were sequenced on an Illumina  
853 Nextseq500. Briefly, raw sequencing data were handled using the 10x Genomics Cell  
854 Ranger software ([www.10xgenomics.com](http://www.10xgenomics.com)). Fastq files were mapped to the mm10  
855 genome, and gene counts were quantified using the Cellranger count function.  
856 Subsequently, expression matrices from each experiment were merged and then  
857 imported into Seurat (version 4.0.4, <https://satijalab.org/seurat/>) for log  
858 normalization. Cells with a percentage of mitochondrial reads above 10%, and with less  
859 than 250 features, were filtered out. Batch effects were corrected by regressing out the  
860 number of mitochondrial read percentage using the `vars.to.regress` function. Doublet  
861 contamination was removed using DoubletFinder (version 2.0.3) (McGinnis et al., 2019).  
862 Sample integration was achieved using SCTransform (version 0.3.2) (Hafemeister and  
863 Satija, 2019) before running principal component analysis (PCA) was performed and  
864 significant principal components were used for graph-based clustering. UMAP was used  
865 for 2-dimensional visualization (<https://github.com/lmcinnes/umap>). Differential  
866 expression of genes per cluster was performed using the Wilcoxon rank sum test  
867 (`FindMarkers` function default). For pseudotemporal analysis, normalized data from  
868 endothelial cells were passed from Seurat to Monocle2 (Qiu et al., 2017a; Qiu et al.,  
869 2017b; Trapnell et al., 2014) (version 2.20.2). The Monocle2 BEAM statistical test was  
870 utilized to determine genes changing in a pseudo temporal manner. To identify  
871 transcription factors regulating the changes in gene expression across endothelial  
872 development, we use SCENIC (version 1.2.4) (Aibar et al., 2017). Both +/- 500 bp and

873 +/- 10 kb around the murine TSS motif ranking databases were used for the analysis  
874 with default parameters. Genes that were co-regulated by two or more regulons were  
875 visualized using Cytoscape (version 3.8.2) (Shannon et al., 2003).

876 To identify receptor-ligand interactions, we subset the endothelial, pericyte, and  
877 microglia clusters from E9.5 and adult mice. The Wilcoxon signed ranked test was used  
878 to identify differentially expressed genes between timepoints in each cluster. Only  
879 genes present in at least 10% of cells, and with a log fold change above 0.25, were  
880 considered. We then use CCInx (version 0.5.1, (Ximerakis et al., 2019) to identify  
881 interaction between cell populations across time. Results can be accessed at the  
882 interactive shinyapp ([https://mcantug.shinyapps.io/Endo\\_CCInxE9Ad/](https://mcantug.shinyapps.io/Endo_CCInxE9Ad/)). Upstream  
883 regulation of differentially expressed genes in E9.5 and adult samples was analyzed  
884 and visualized by circus plot using NicheNET (version 1.0.0) (Browaeys et al., 2020)  
885 with default parameter settings. Only active ligands at the 95<sup>th</sup> quantile was shown.

886

### 887 **OMNI-ATAC and RNA-Seq of Blood-Brain Barrier hCMEC/D3 Cells:**

888 Immortalized hCMEC/D3 (Millipore, SCC066) cells were grown to confluence using  
889 endothelial cell medium (ScienCell, #1001) on plates coated with Collagen Type I Rat  
890 Tail (Sigma-Aldrich, #C7661). Passages 4-6 were used for experiments. ATAC libraries  
891 were processed as previously described (Corces et al., 2017). The quality of purified  
892 DNA libraries was assessed using the Agilent High Sensitivity DNA kit (Agilent  
893 Technologies). Paired end, 2 x 75 bp sequencing was performed on an Illumina  
894 Nextseq 500 instrument. Reads were mapped to the GRCh38 version of the human  
895 genome using Bowtie2 with default paired-end settings (Langmead and Salzberg,

896 2012). Mitochondrial reads, reads with a MAPQ < 10, and reads which did not align to  
897 the reference genome were removed using Samtools (version 1.13) (Danecek et al.,  
898 2021). Duplicated reads were then removed with Picard MarkDuplicates (Institute,  
899 2019). Peak calling was carried out with MACS2 (callpeak --nomodel --broad)  
900 (v2.2.7.1)(Zhang et al., 2008). Diffbind (version 3.2) (Ross-Innes et al., 2012; Stark R,  
901 2011) was used to import peaksets (min.overlap= 0.66) into RStudio Server (version  
902 1.4.1717, <https://www.rstudio.com>) using R (version 4.1 (Team, 4.1). dba.blacklist  
903 function was used to filter out peaks that overlap with the ENCODE blacklist.  
904 Consensus peaks were converted to mm10 using the LiftOver tool available from the  
905 UCSC Genome Browser (<https://genome.ucsc.edu/cgi-bin/hgLiftOver>). A region was  
906 considered conserved if a minimum 0.95 ratio of bases remapped to the murine  
907 genome. Selected regions were also examined using the ECR Browser (Ovcharenko et  
908 al., 2004) where the regions were analyzed using rVista 2.0 (Loots and Ovcharenko,  
909 2004) to identify conserved transcription factor motifs. The TRANSFAC professional  
910 V10.2 vertebrate library was used with default parameters.

911 RNA was isolated using Trizol. Upon processing, RNA from all samples was  
912 thawed and following confirmation of integrity and concentration using a Bioanalyzer,  
913 100 ng was used for low-input library preparation using the NEBNext Ultra II RNA  
914 Library Prep kit for Illumina. The libraries were then quantified and sequenced using an  
915 Illumina NovaSeq 6000 at a depth of 20 million reads per sample. Reads were first  
916 mapped to the human genome (GRCh38) using Salmon (version 1.5.1) (Patro et al.,  
917 2017). Transcript level quantification was then imported using txtimport (version 1.20.0)  
918 (Soneson et al., 2015) and analyzed using DESeq2 (Love et al., 2014). Genes were

919 kept and considered actively expressed if they had more than 10 raw counts and >2  
920 log2 fold change normalized expression.

921

922 **Statistics:** Unless otherwise indicated, experiments were performed using a minimum  
923 of 2 independent biological replicates.

924

925 **Data availability:**

926 Datasets generated within this manuscript were deposited to the Gene Expression  
927 Omnibus, (GEO: GSE185345. Human dataset GEO: GSE187565).

928

929 **Acknowledgments:** We thank Dr. Jason Fish for critical comments on the manuscript,  
930 and Ms. Karen Berman de Ruiz and Dr. Alexander Herman for assistance with mouse  
931 husbandry and organ isolation. Diagrams in some figures were created using  
932 Biorender.com.

933

934 **Author Contributions:** M.C.G., M.C.H. and J.D.W. were responsible for the  
935 conception, design, execution, and interpretation of experiments. M.C.G. and J.D.W.  
936 wrote the original draft. G.L. was involved in the design, execution, and analysis of  
937 experiments. J.F.M. contributed reagents and resources, supervised M.C.H., interpreted  
938 experiments, and edited the manuscript. All authors revised the manuscript and  
939 consented to its contents.

940

941 **Funding:** This work was supported by grants from the National Institutes of Health  
942 (HL127717, HL130804, HL118761, J.F.M.), (F31 HL136065, M.C.H.); the Vivian L.  
943 Smith Foundation (J.F.M.); the American Heart Association (19PRE34410104, M.C.G.)  
944 (16GRNT31330023); institutional startup funds from the CVRI at Baylor College of  
945 Medicine (J.D.W.); the Caroline Wiess Law Fund, the Curtis Hankamer Basic Research  
946 Fund, and the ARCO Foundation Young Teacher-Investigator Award (J.D.W.); and the  
947 Cancer Research and Prevention Institute of Texas (RP200402) (J.D.W.).

948

949

950

951

952

953

954

955

956

957

958

959

960

961

962

963



**A**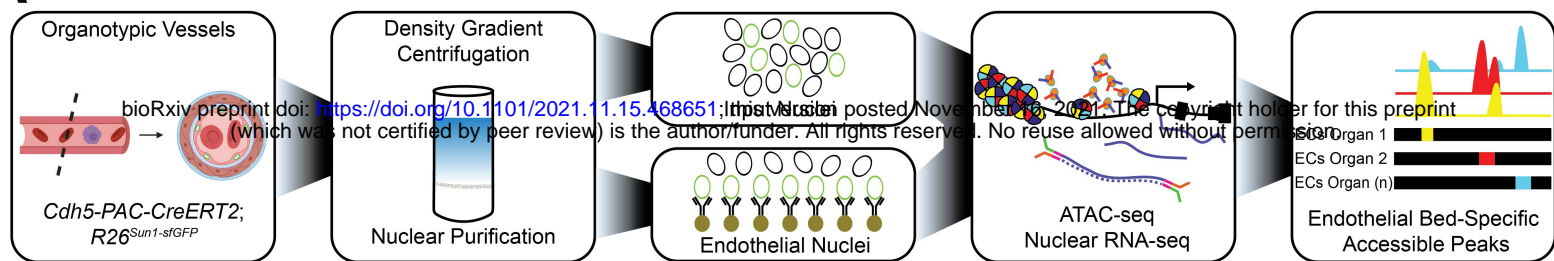**B**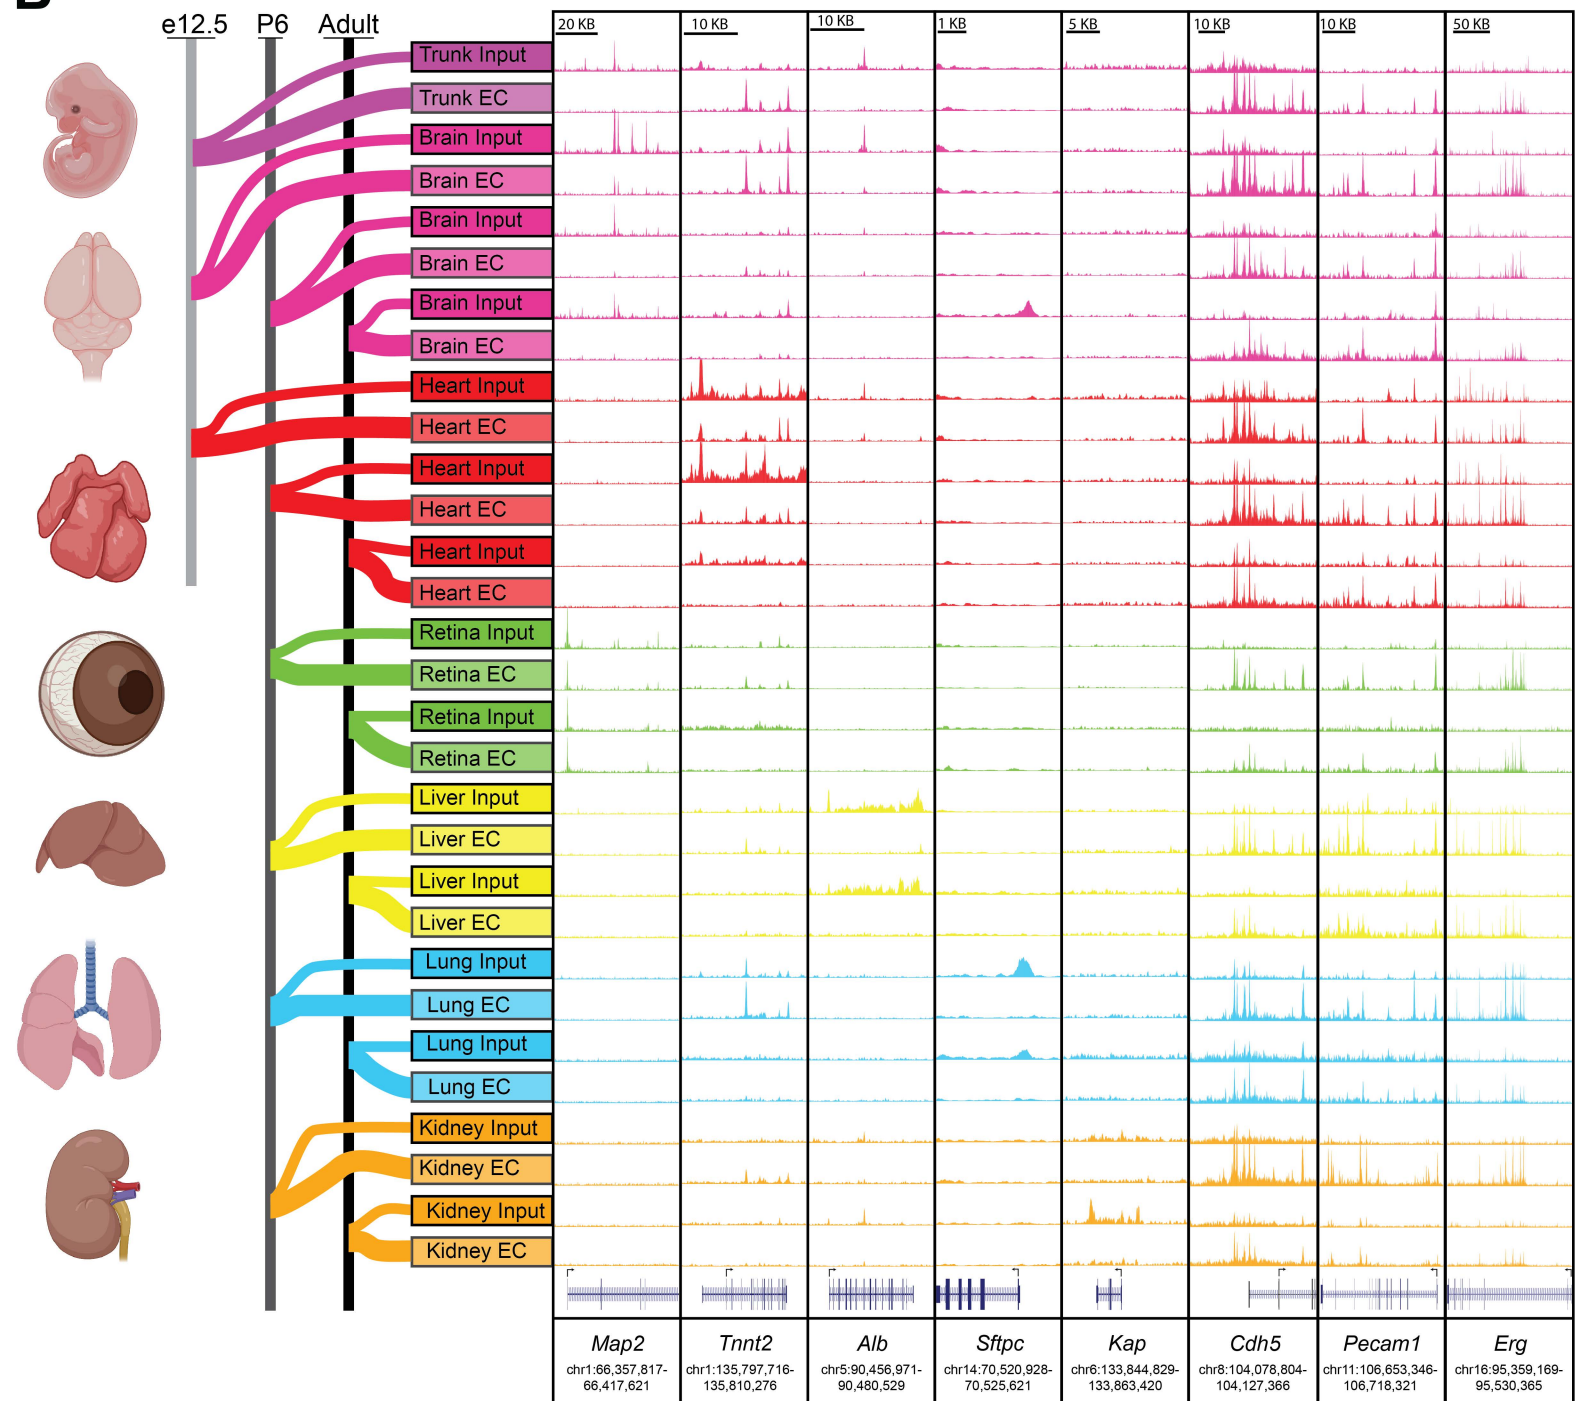**C**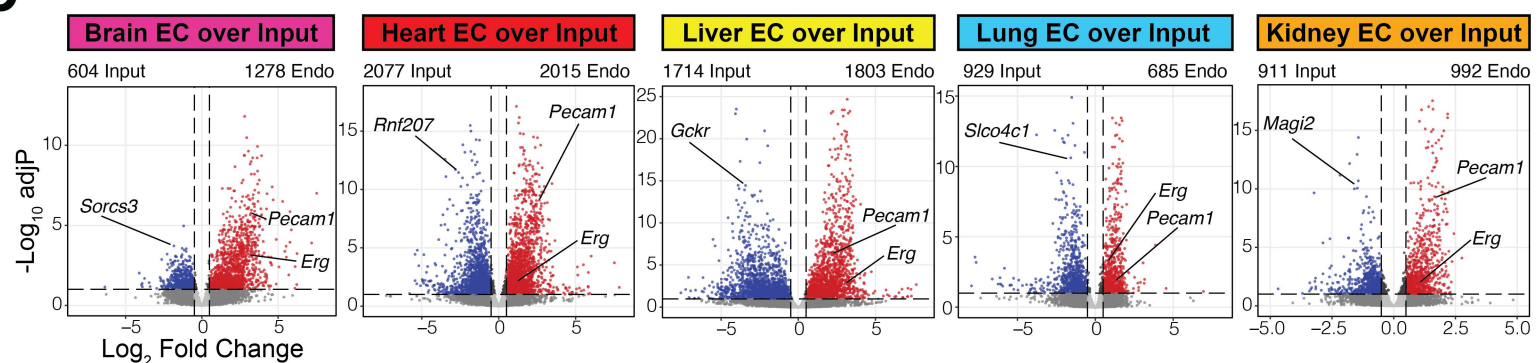**Figure 1**

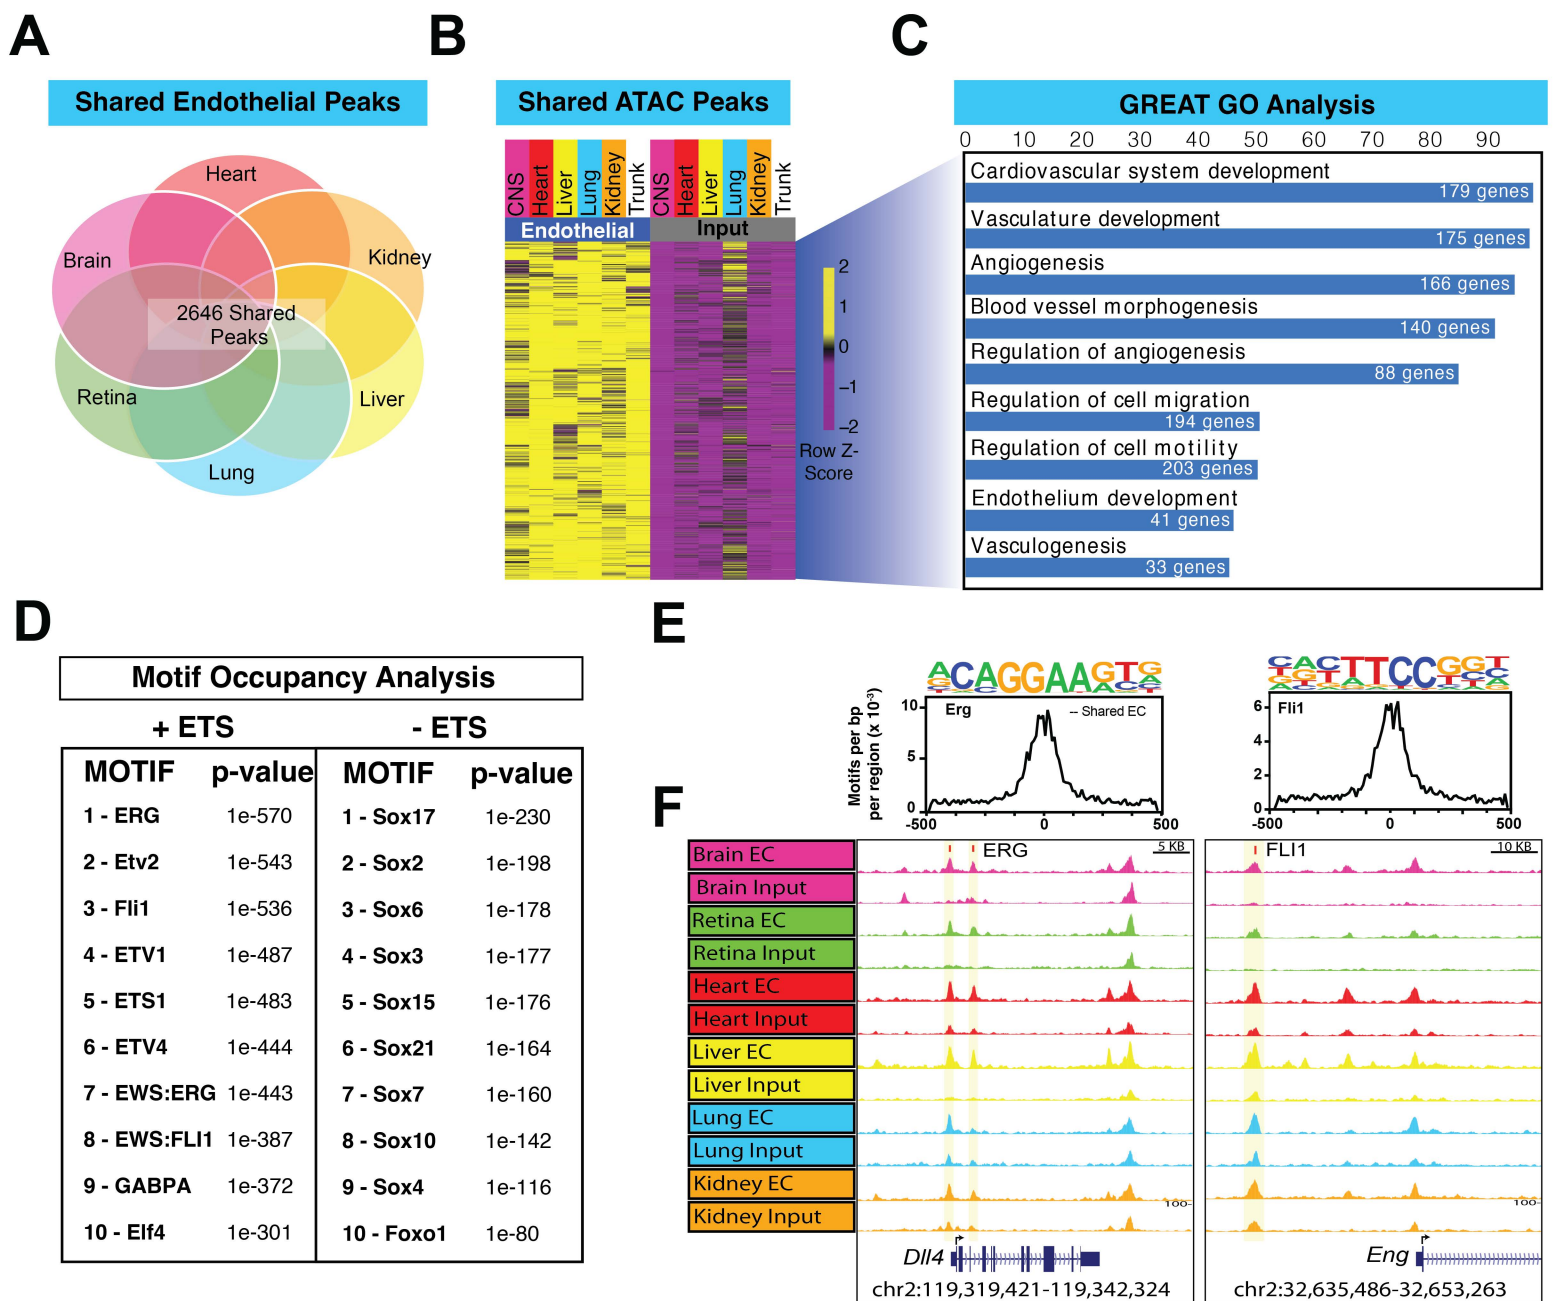

**Figure 2**



**A**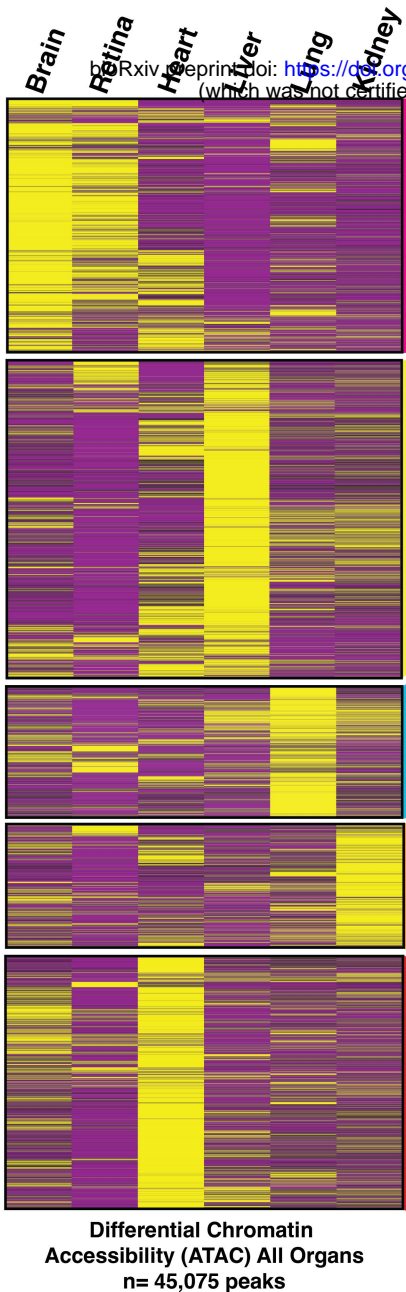**B**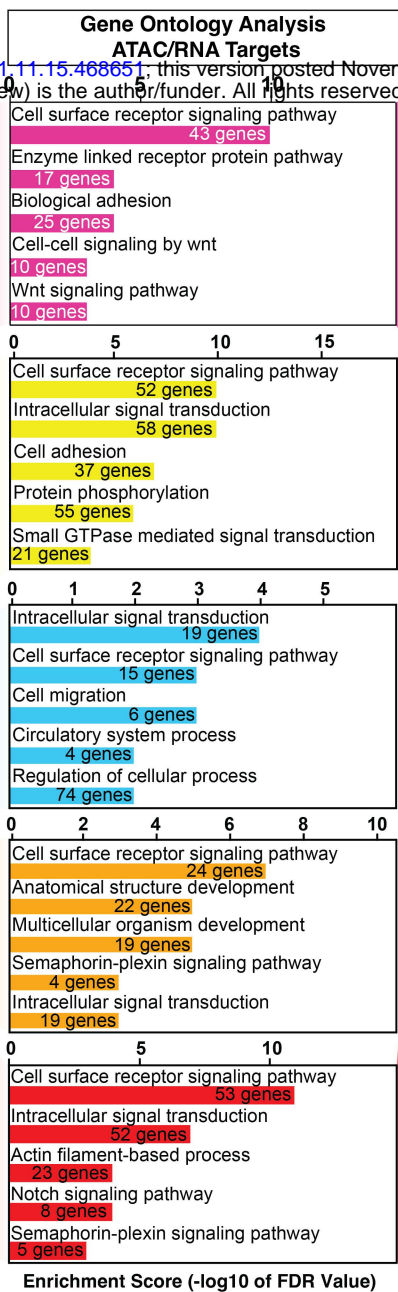**C**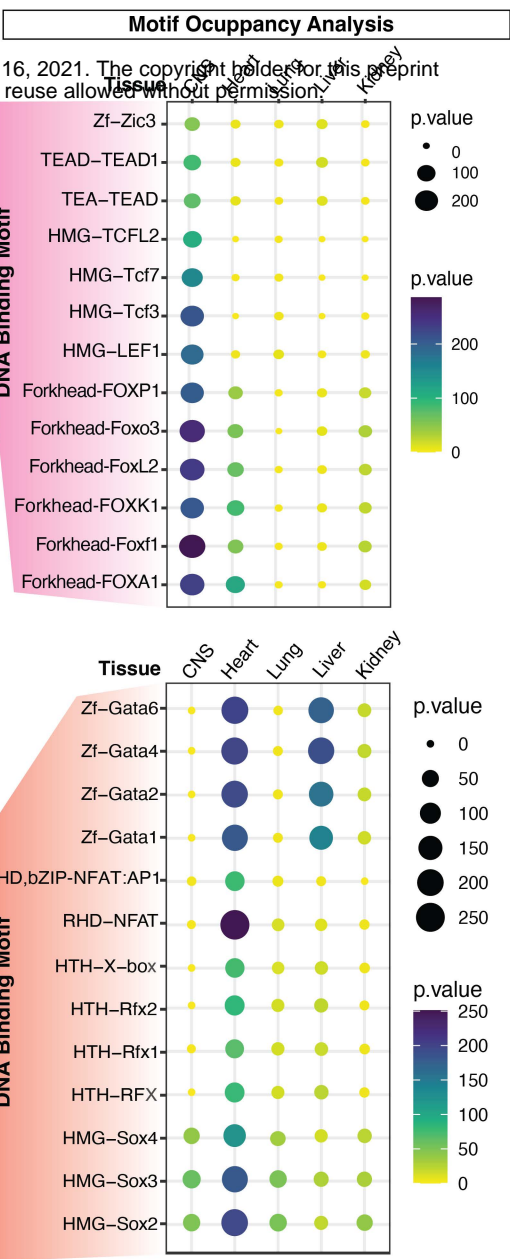**D**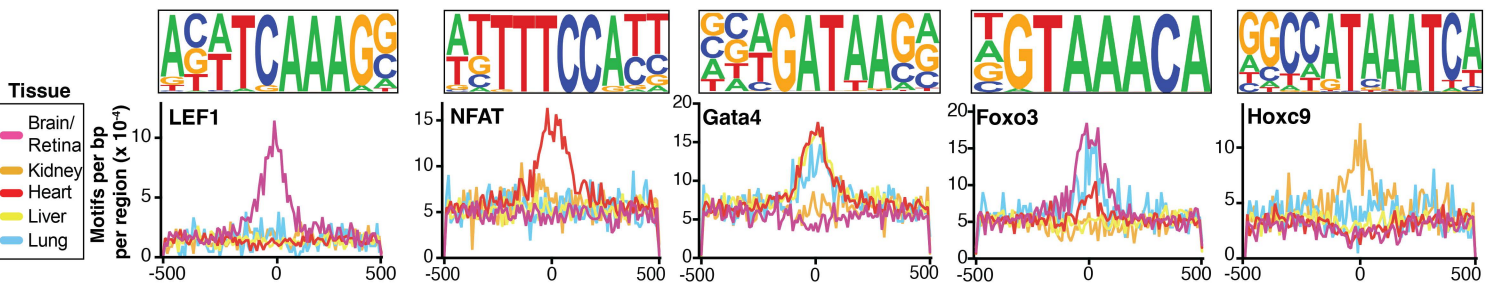**E**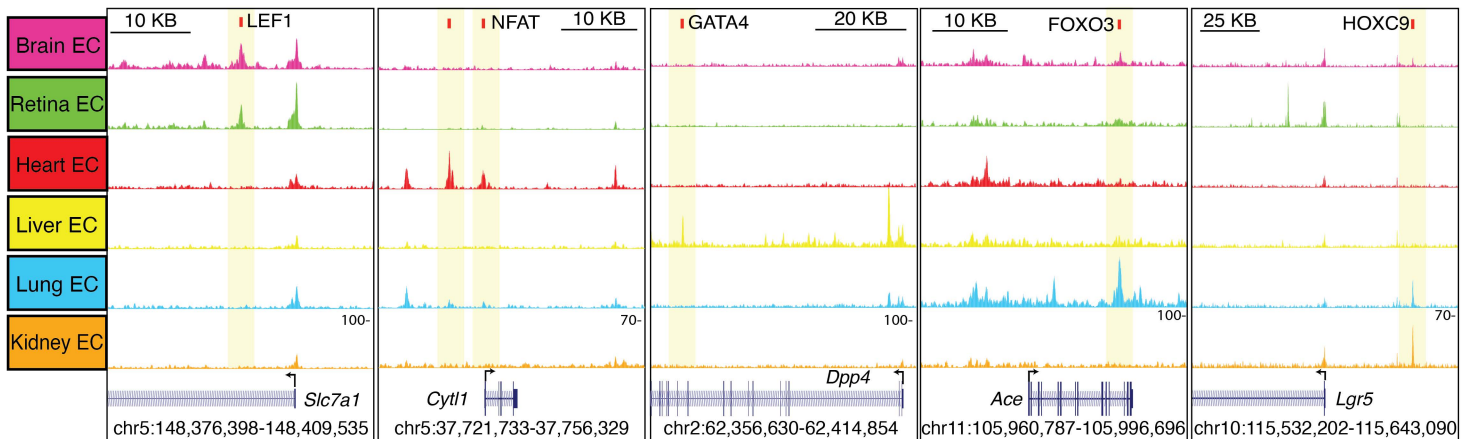**Figure 3**

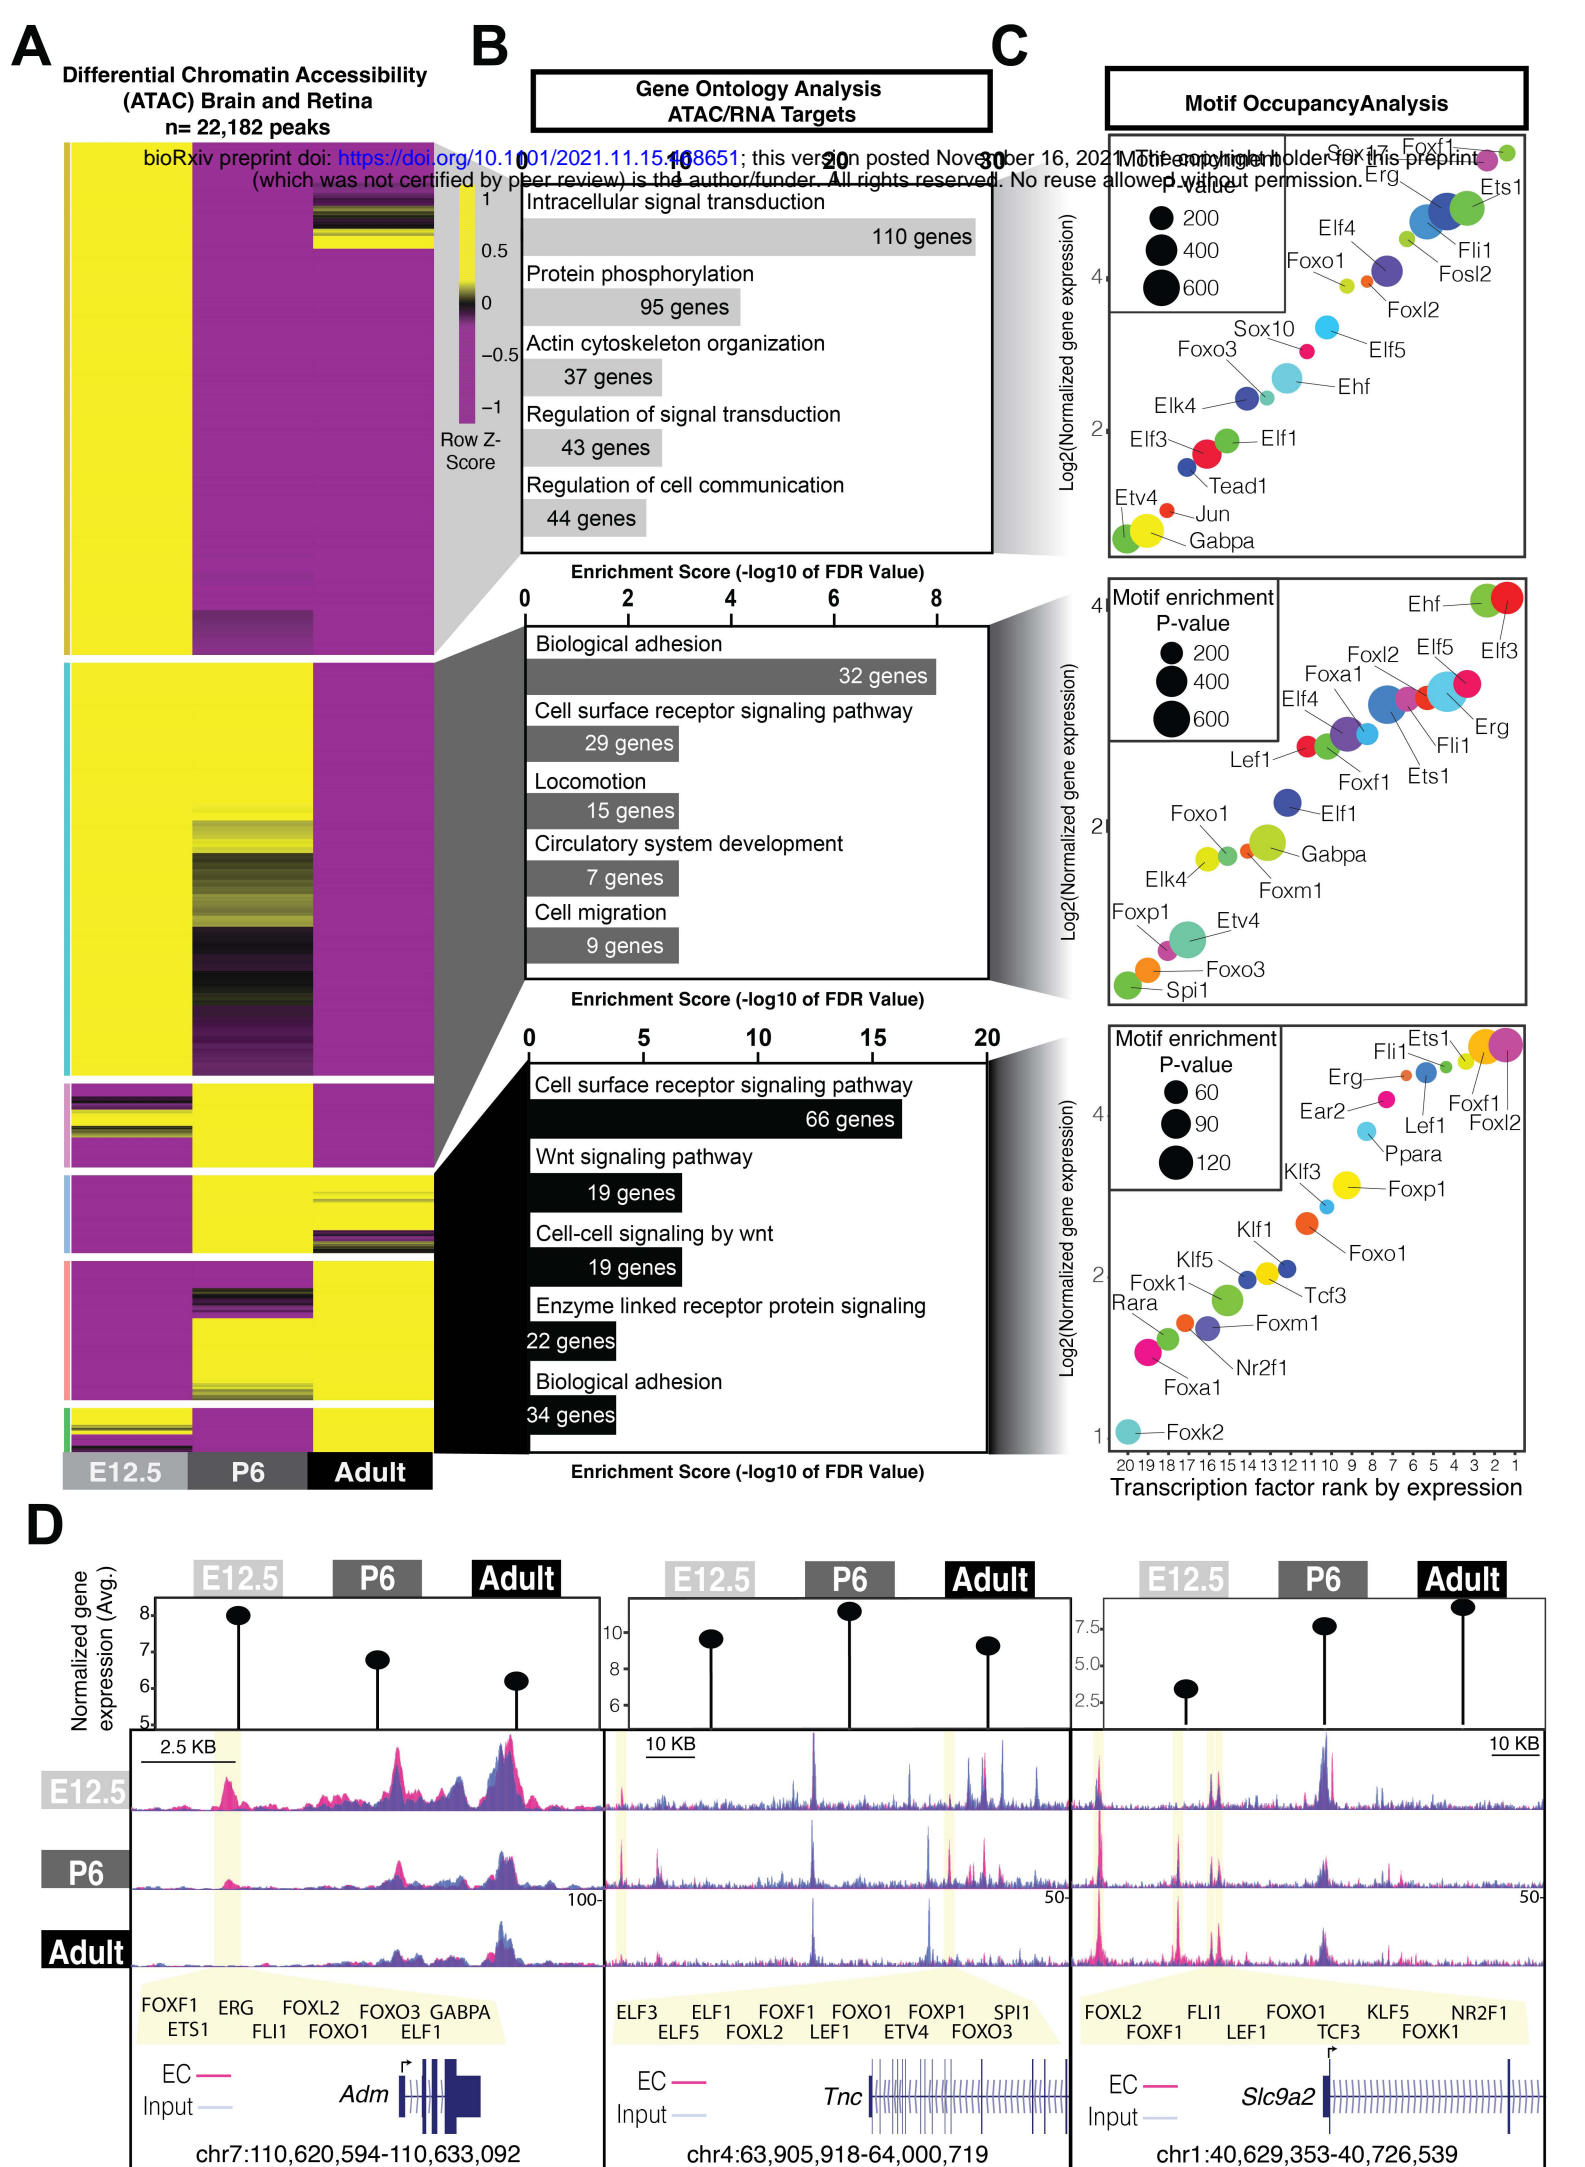

**Figure 4**

**A**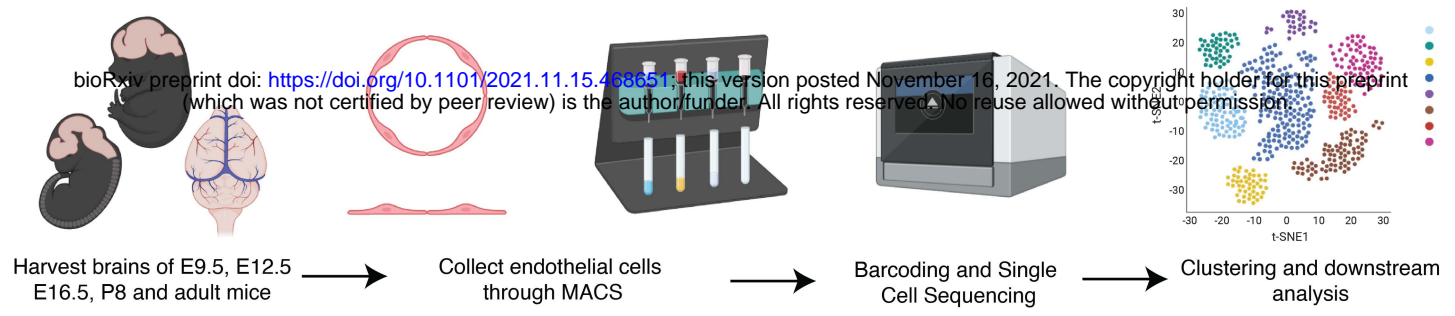**B**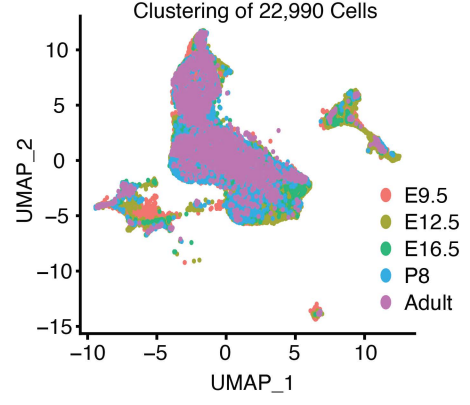**C**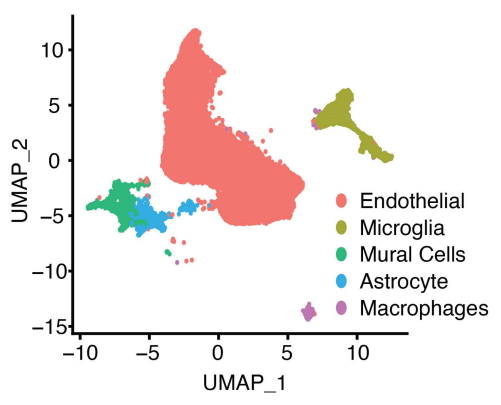**D**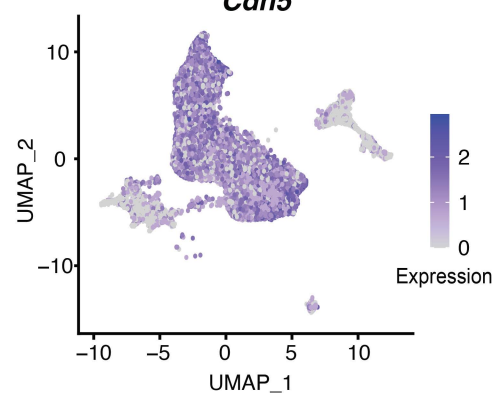**E**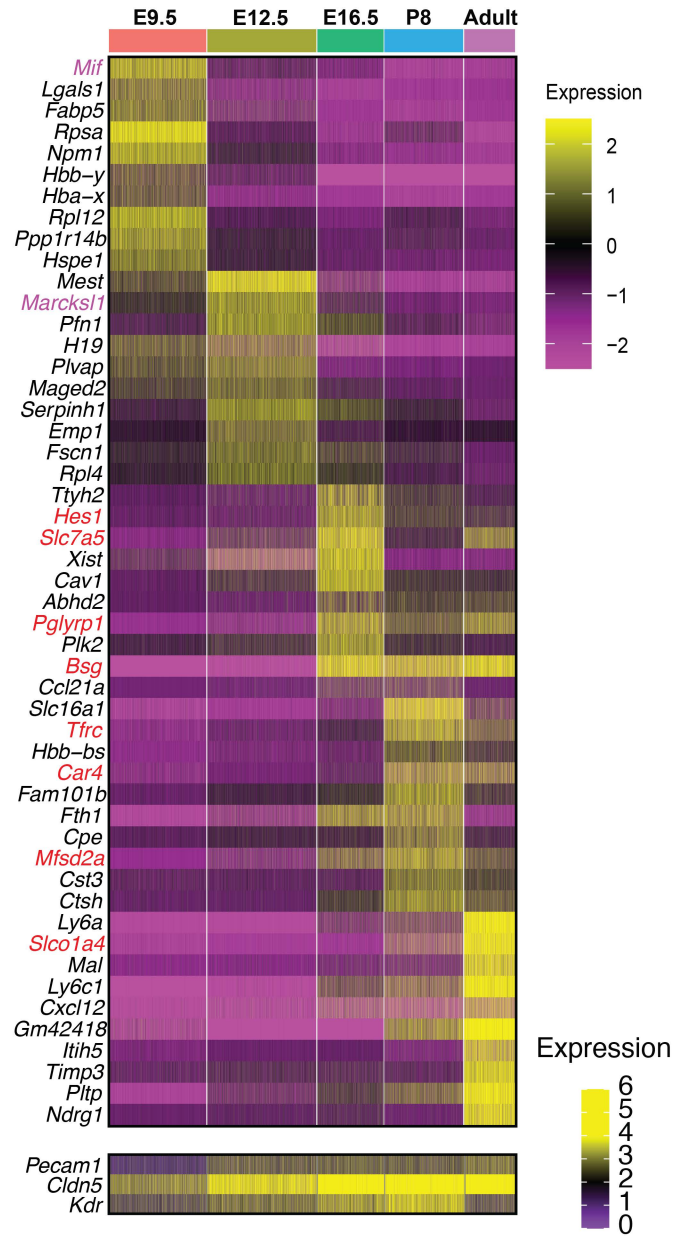**F**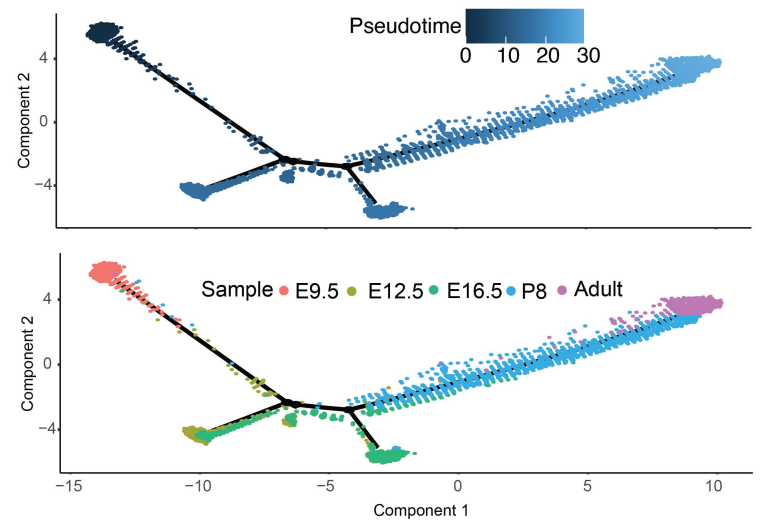**G**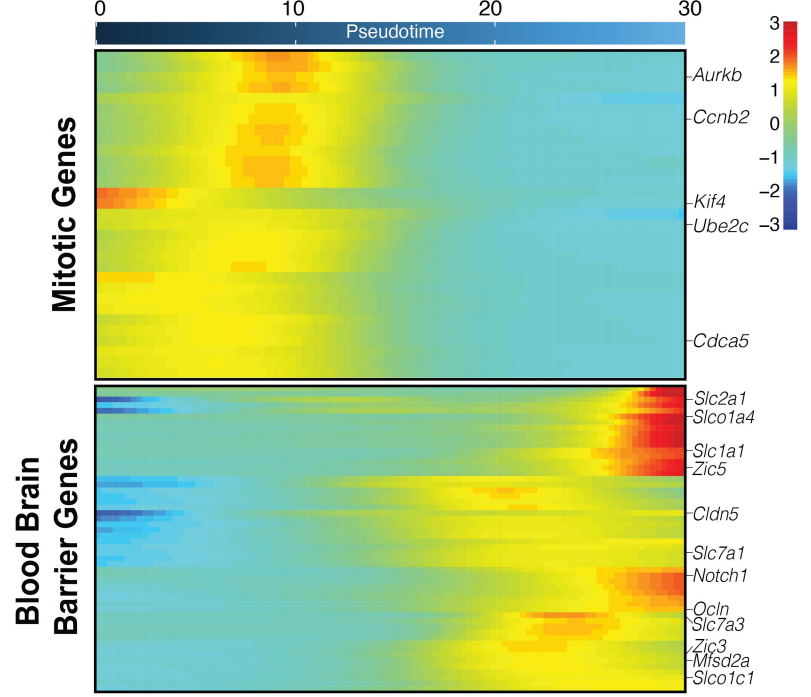**Figure 5**



**A**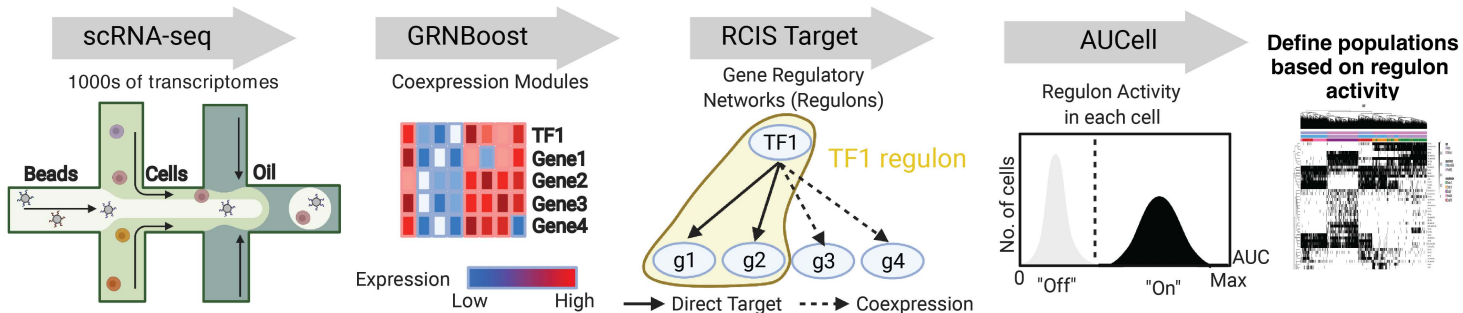**B**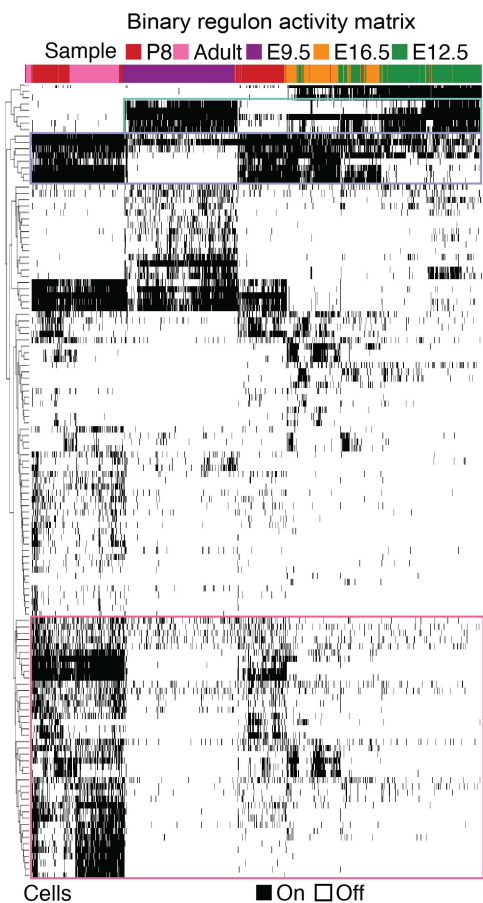**C**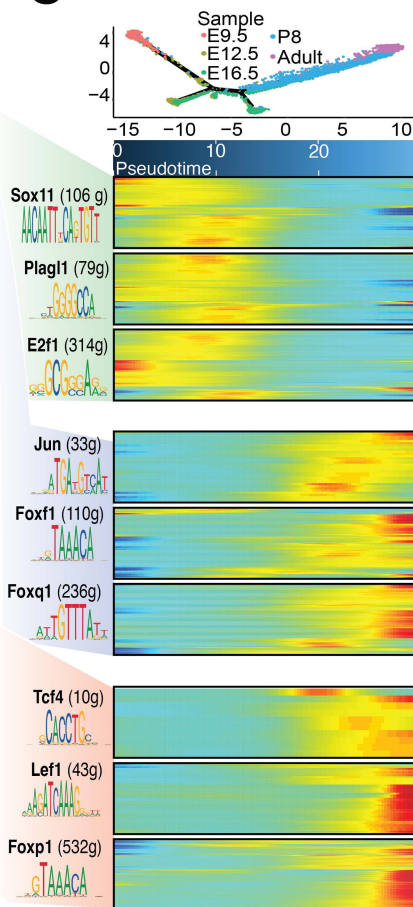**D**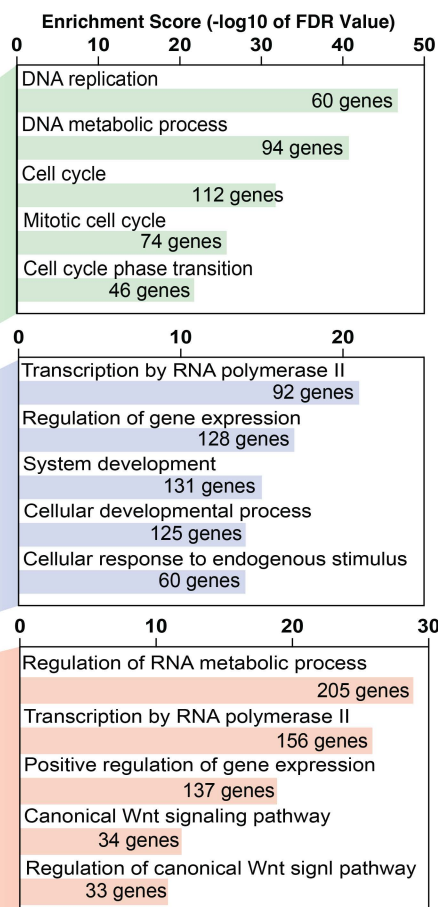**Figure 6**

**A**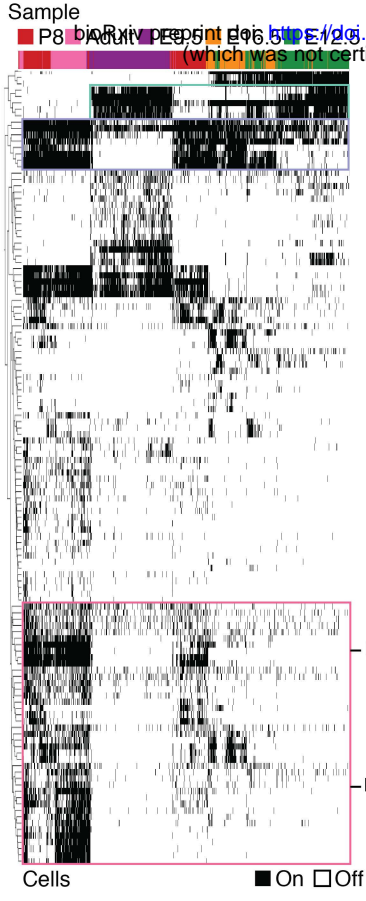**B**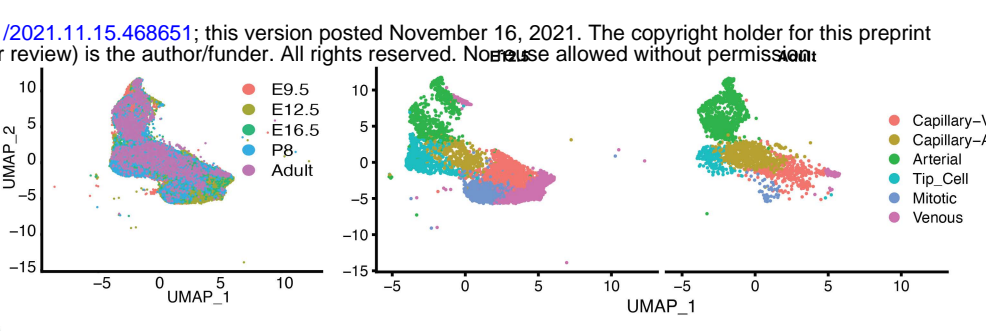**C**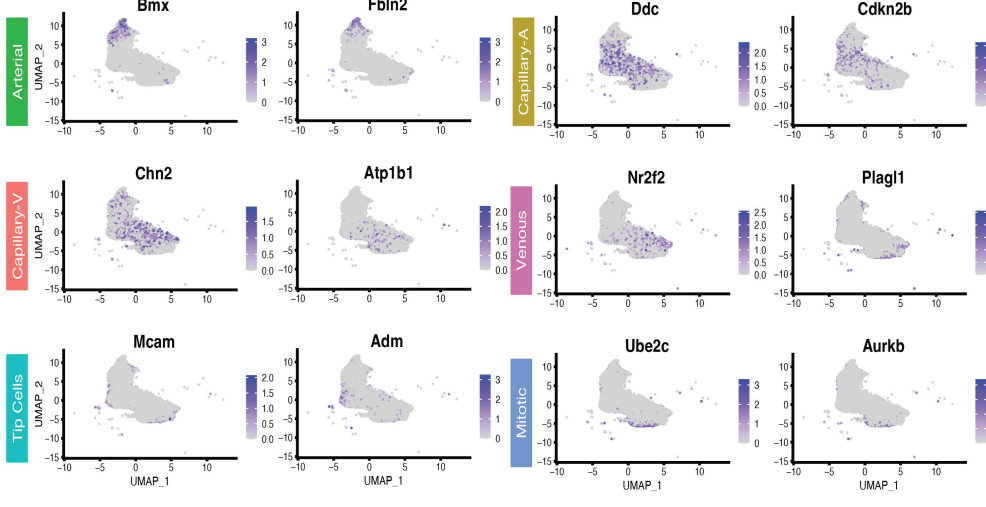**D**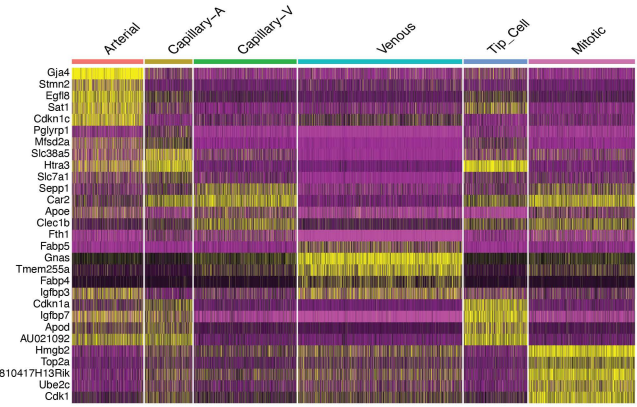**E**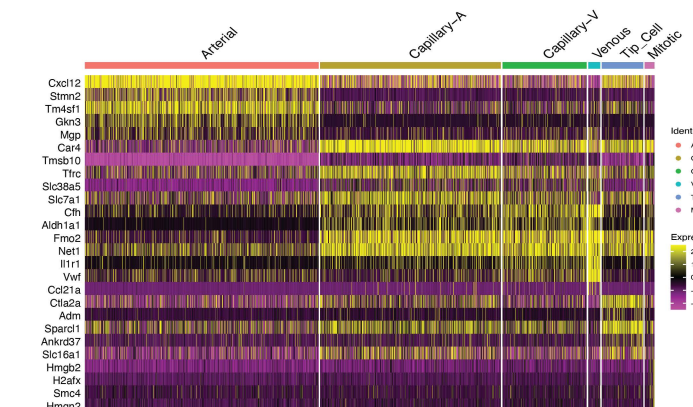**F**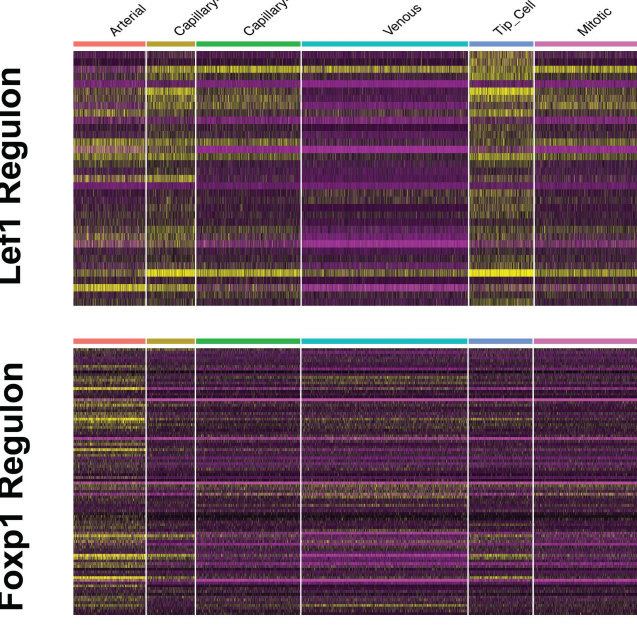**G**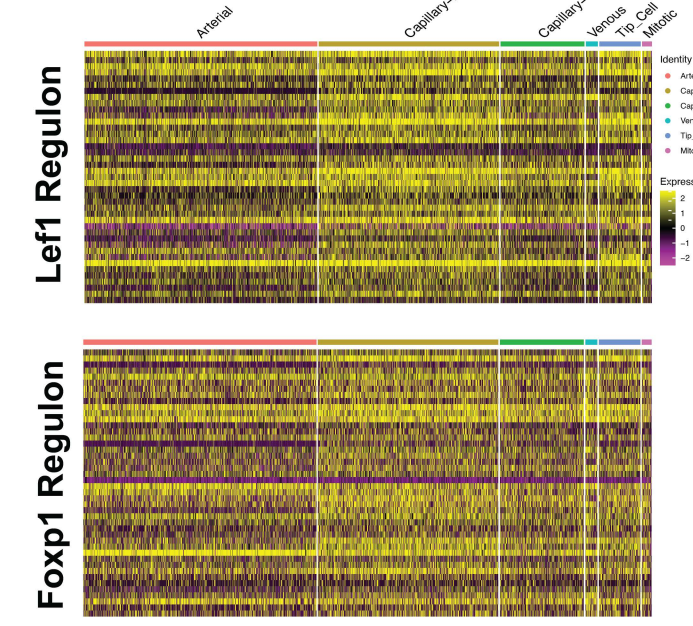**Figure 7**

bioRxiv preprint doi: <https://doi.org/10.1101/2021.11.15.468651>; this version posted November 16, 2021. The copyright holder for this preprint (which was not certified by peer review) is the author/funder. All rights reserved. No reuse allowed without permission.



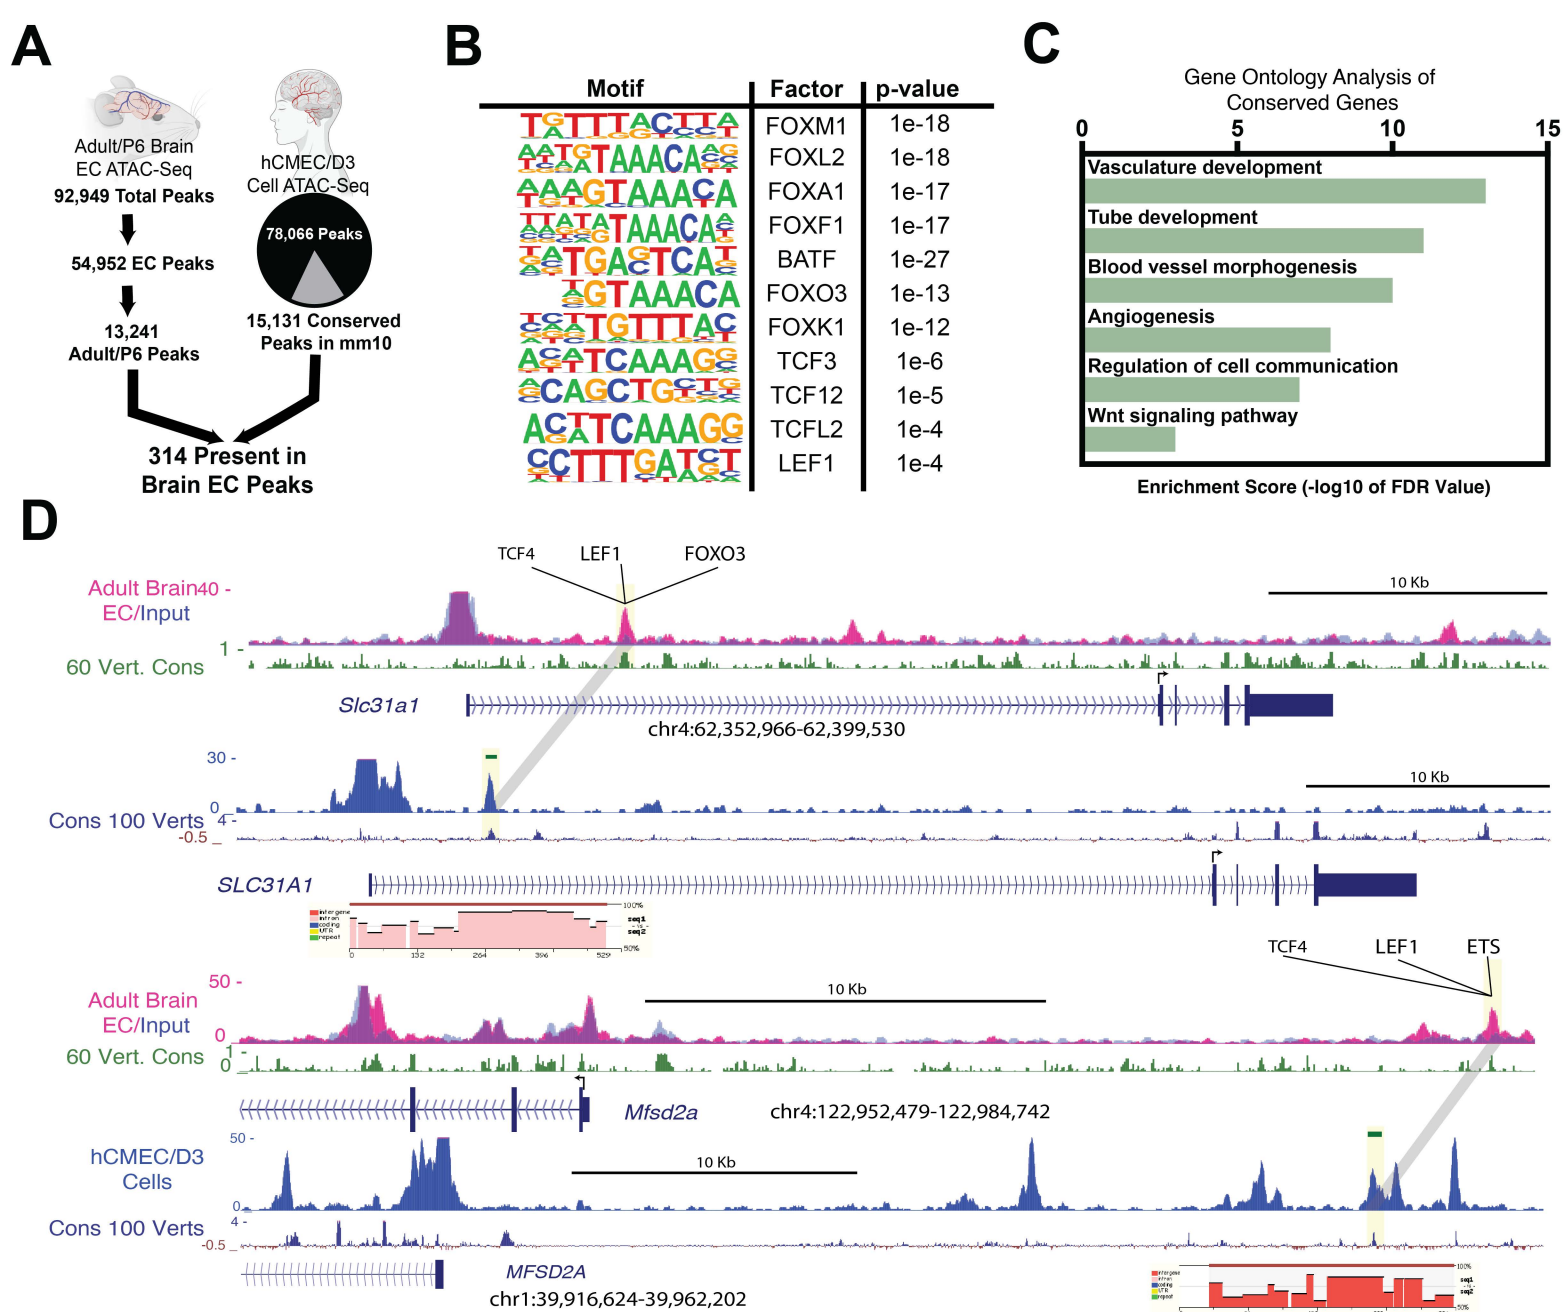

**Figure 8**

**A**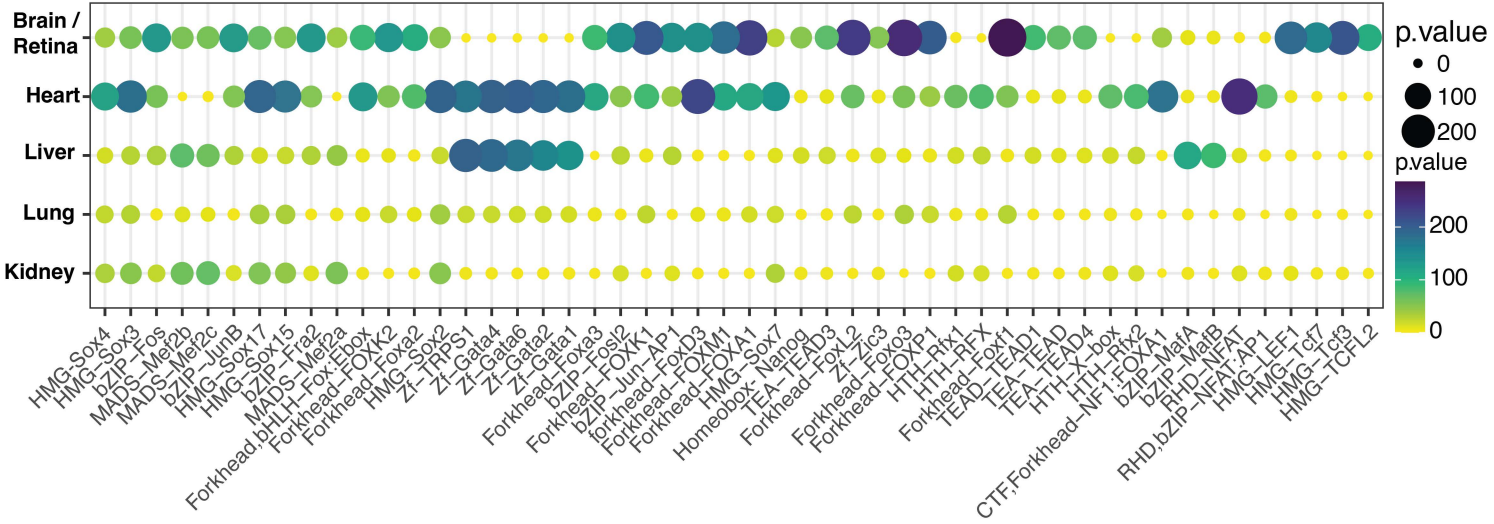**Supplemental Figure 1**

**A**

Differential Chromatin Accessibility  
(ATAC) Heart  
n= 11,079 peaks

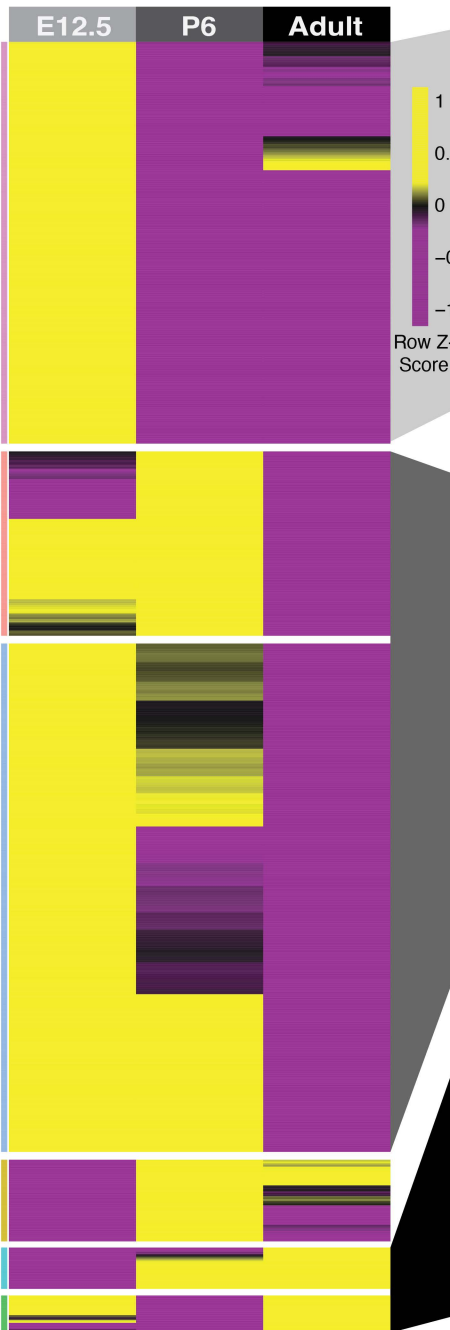**B**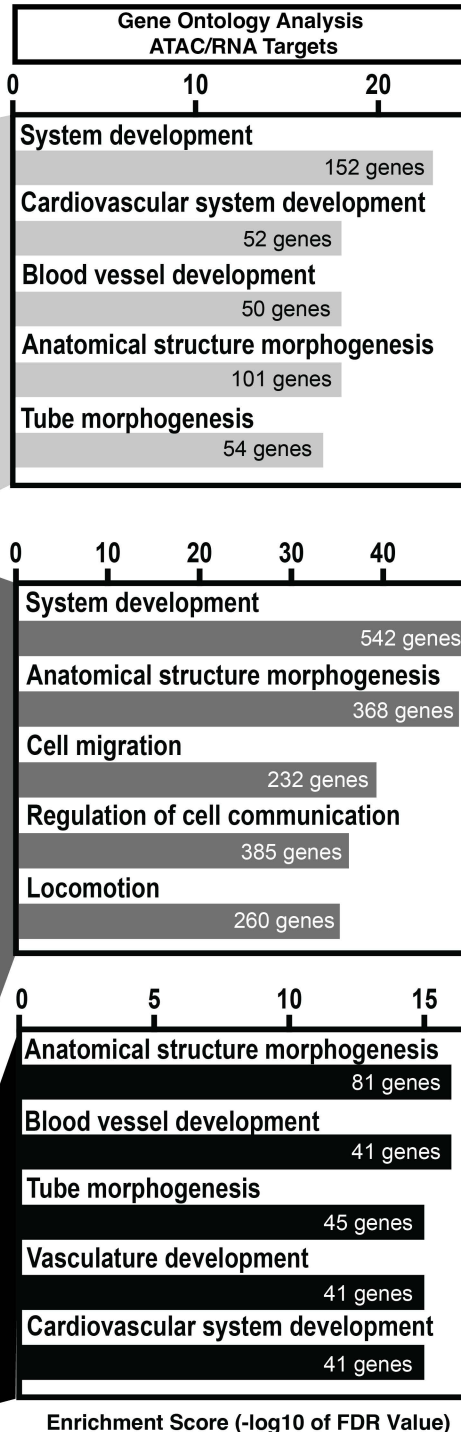**C**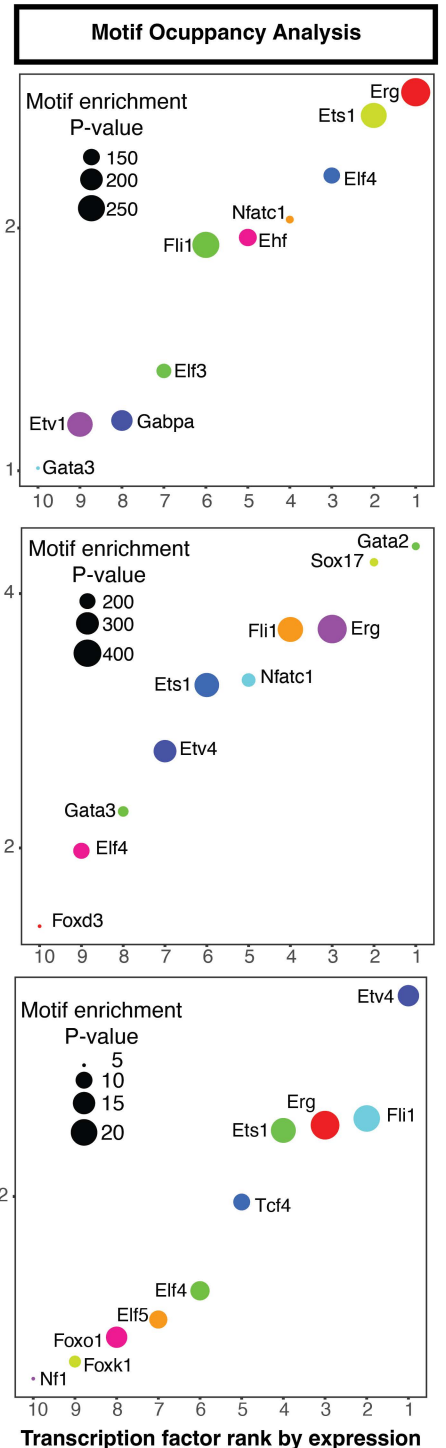

**Supplemental Figure 2**



**A**

Differential Chromatin Accessibility (ATAC) Liver  
n= 8,666 peaks

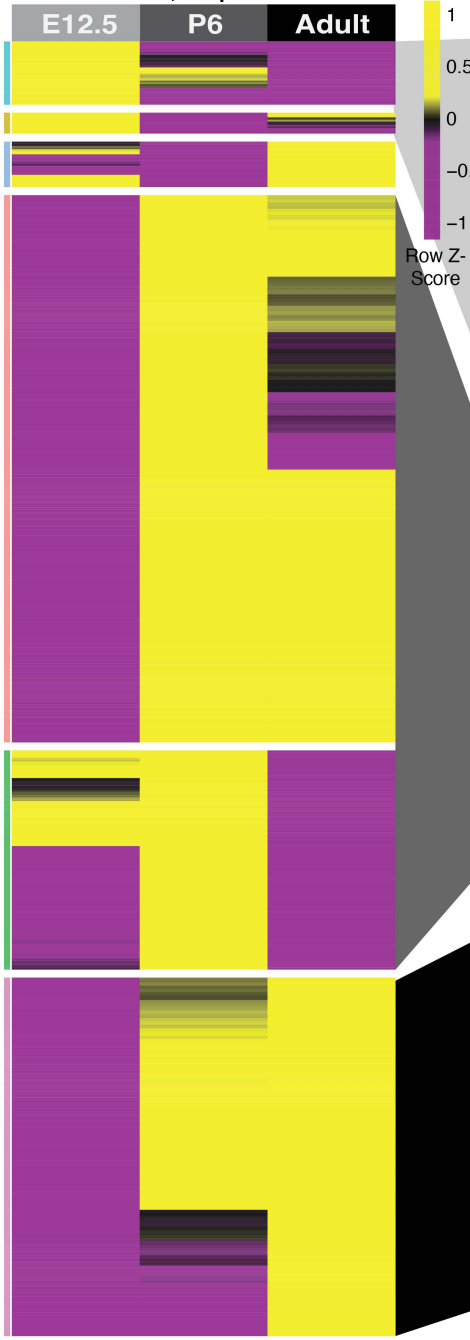**B**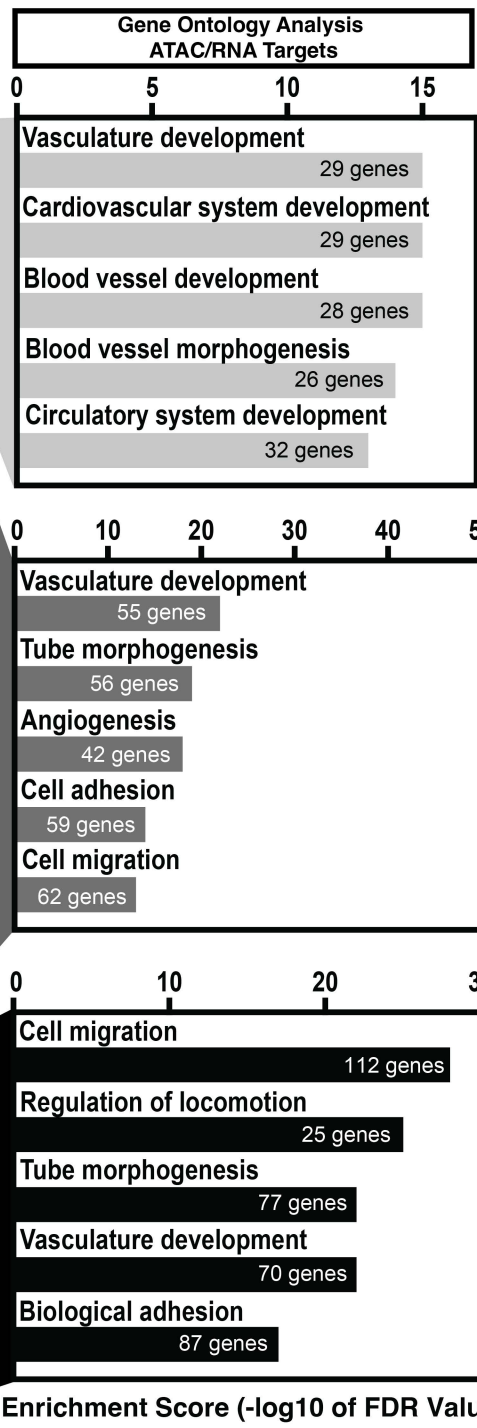**C**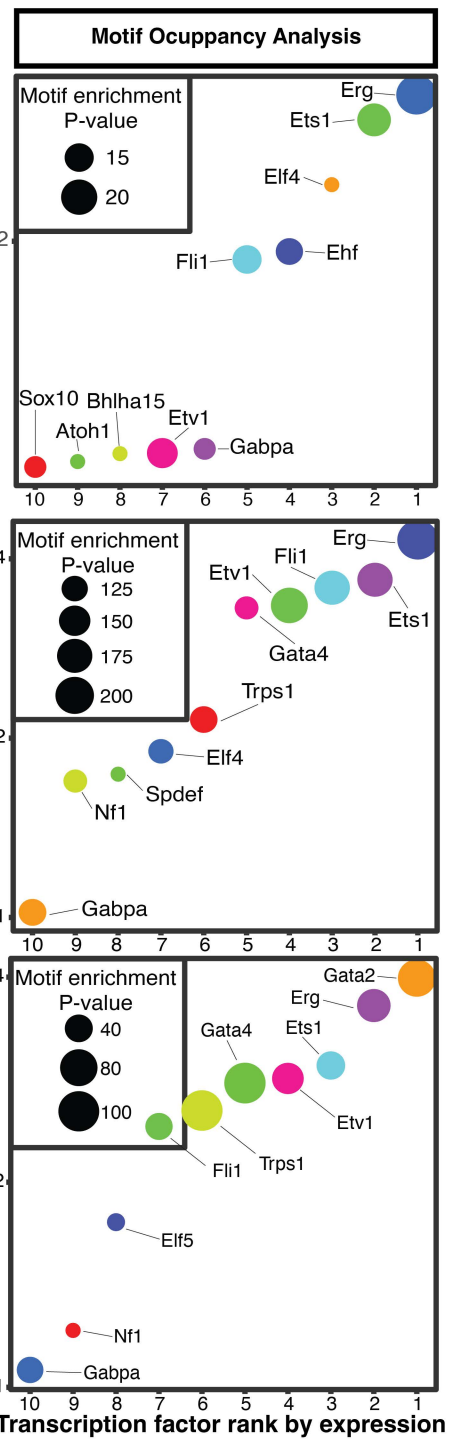

**Supplemental Figure 3**

**A**

Differential Chromatin Accessibility (ATAC) Lung  
n = 1,731 peaks

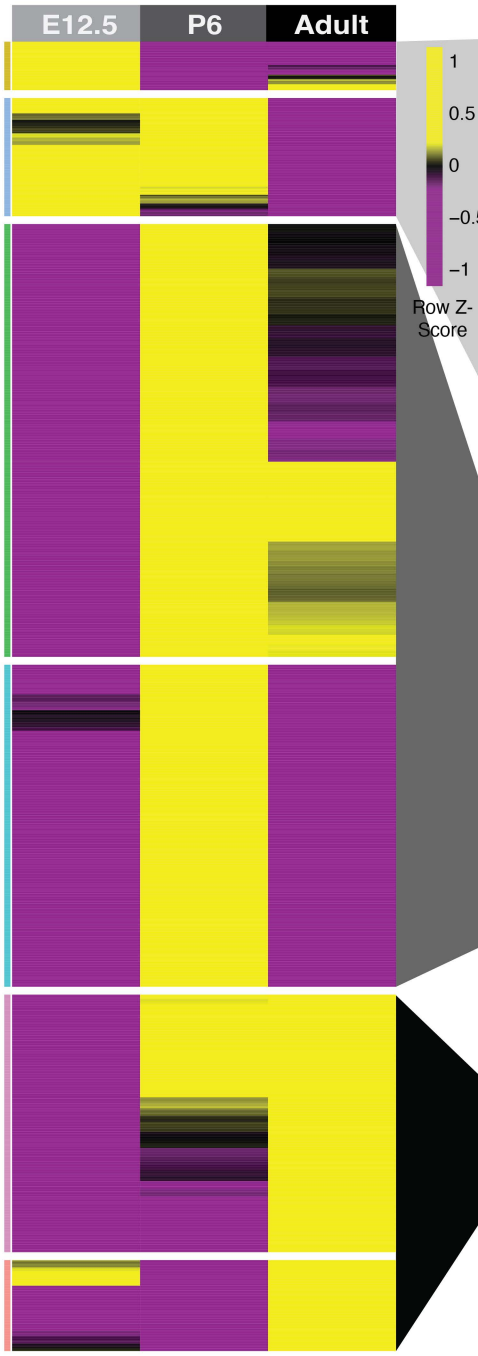**B**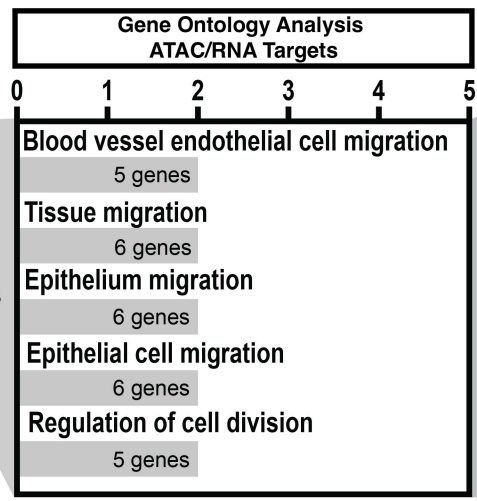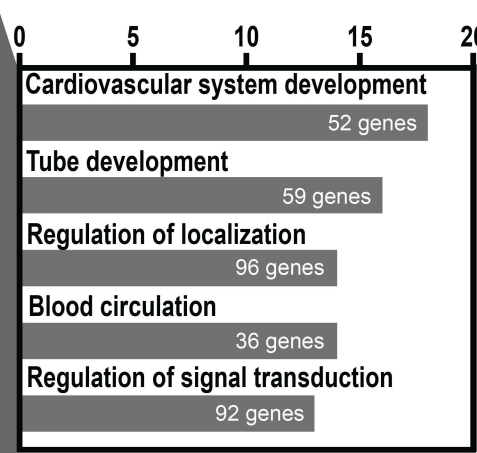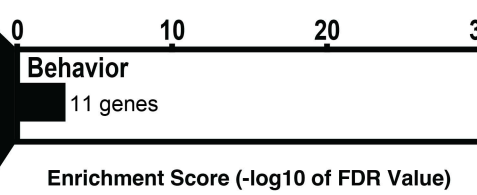**C**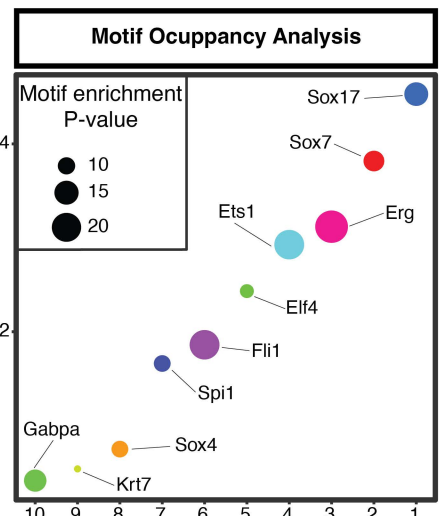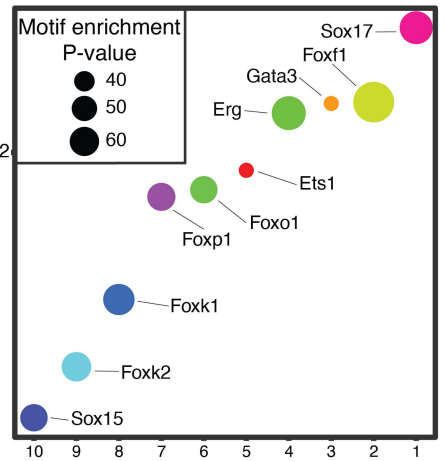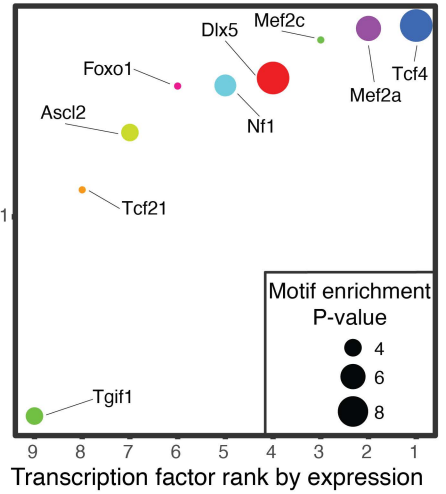

**Supplemental Figure 4**

**A**

Differential Chromatin Accessibility (ATAC) Kidney  
n= 3,035 peaks

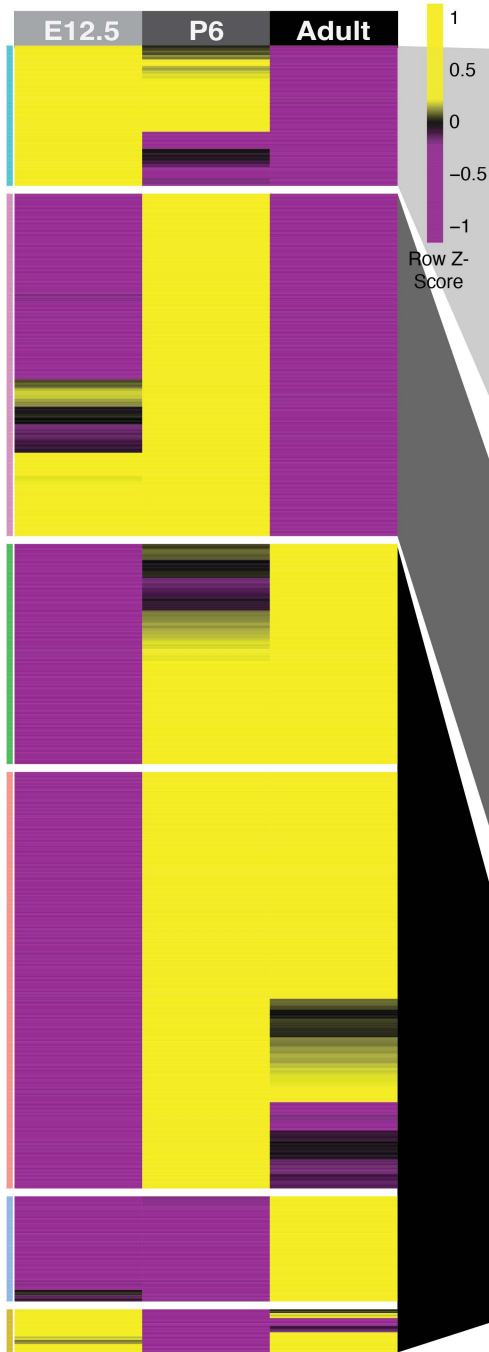**B**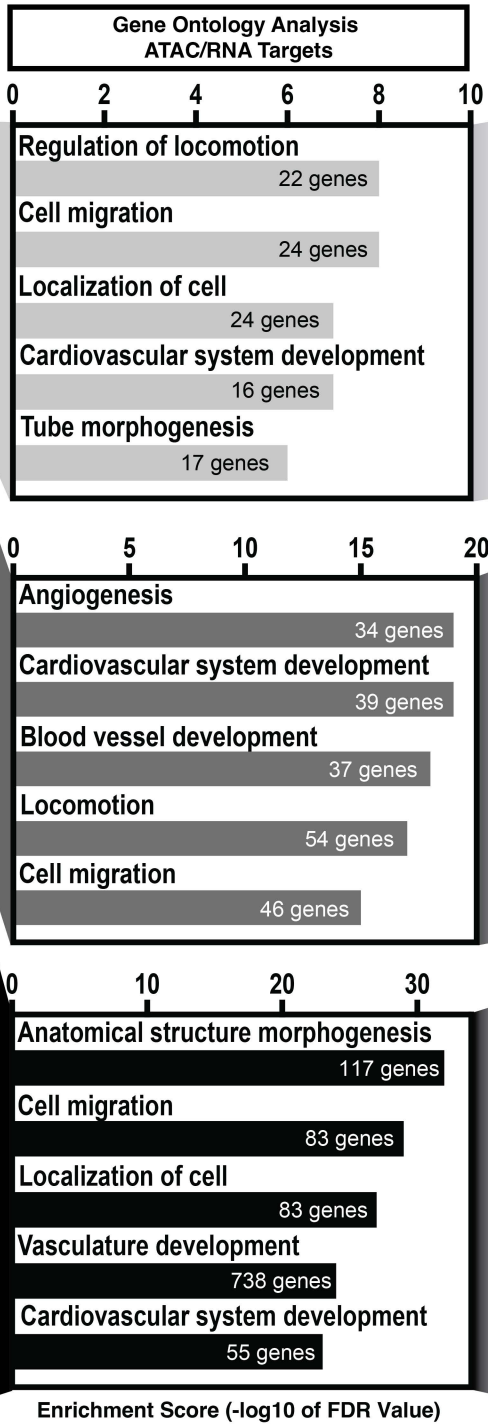**C**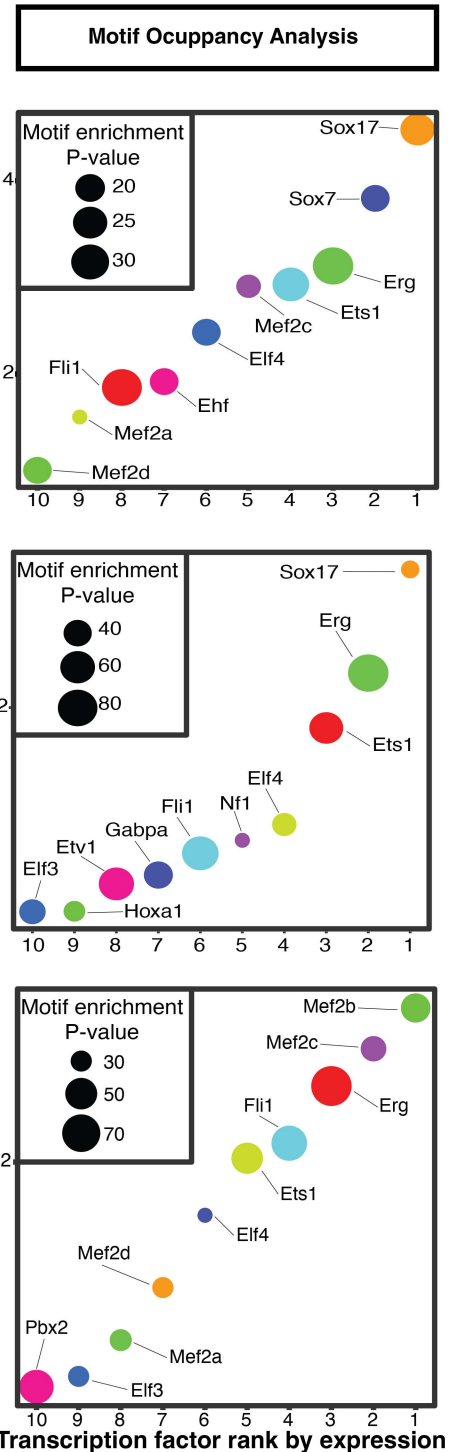

**Supplemental Figure 5**

**A**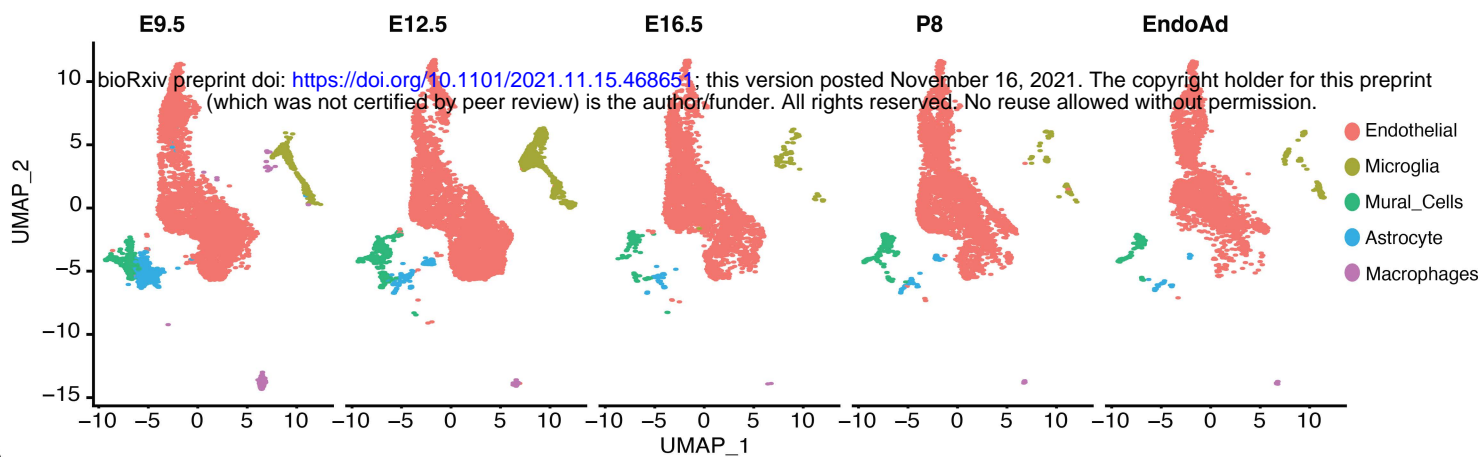**B**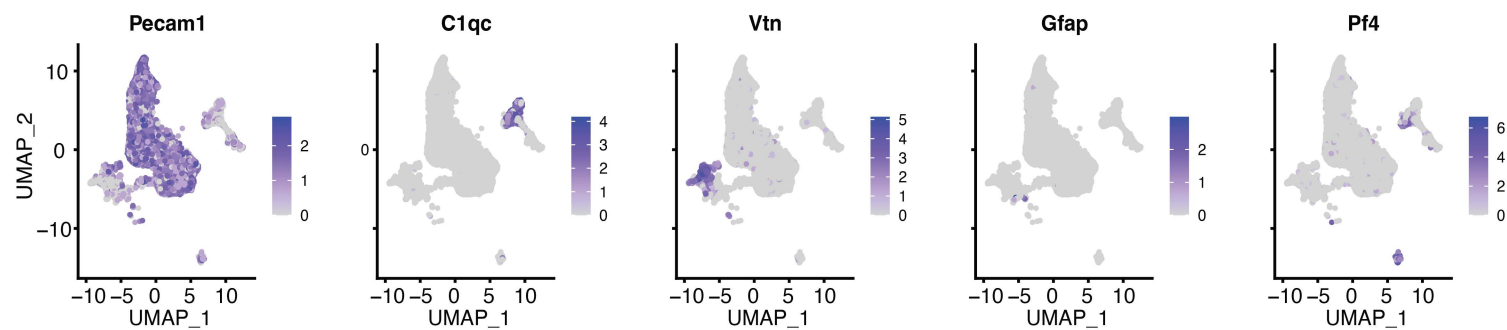**C**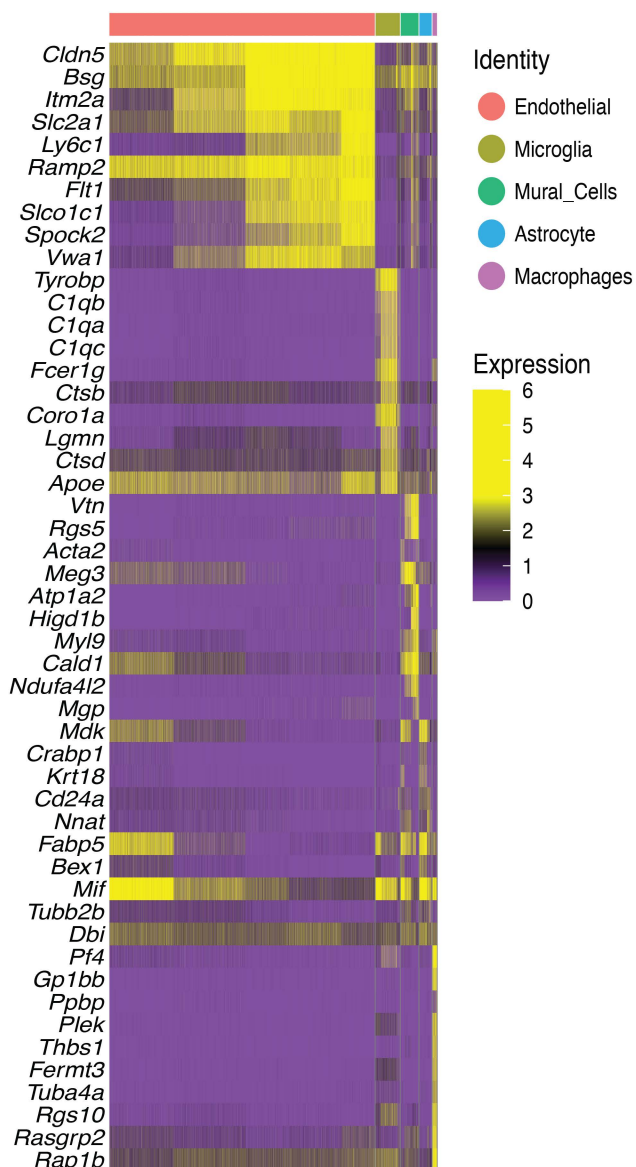**D**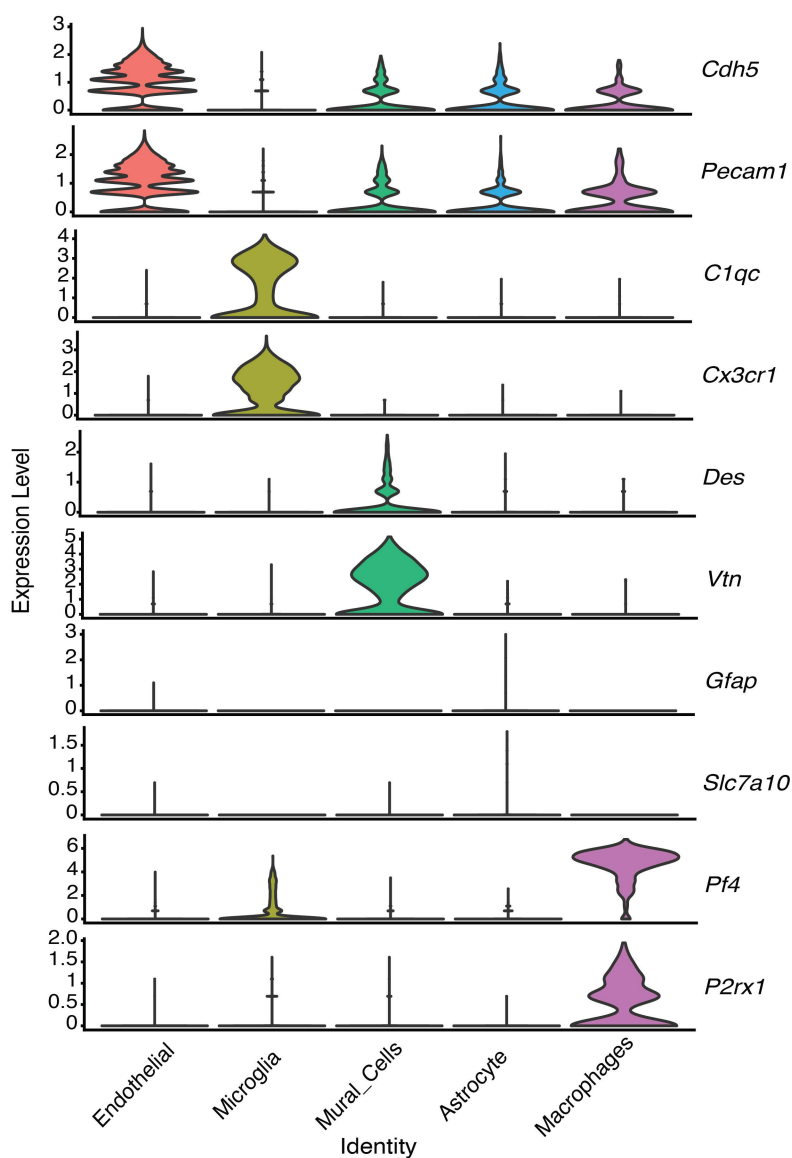**Supplemental Figure 6**

**A**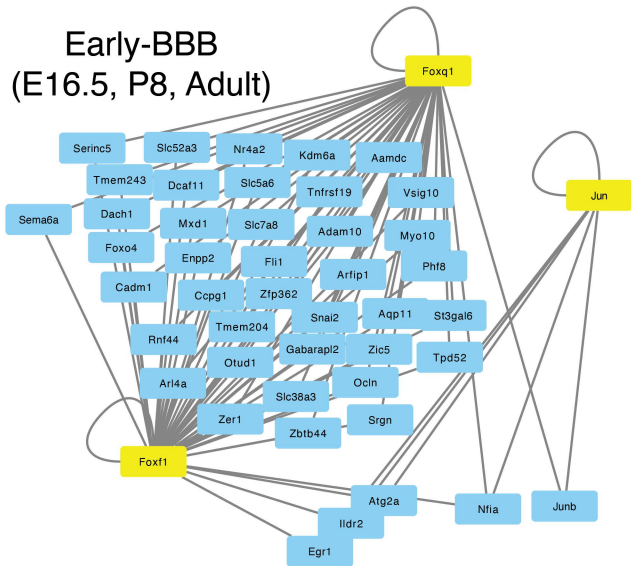**B**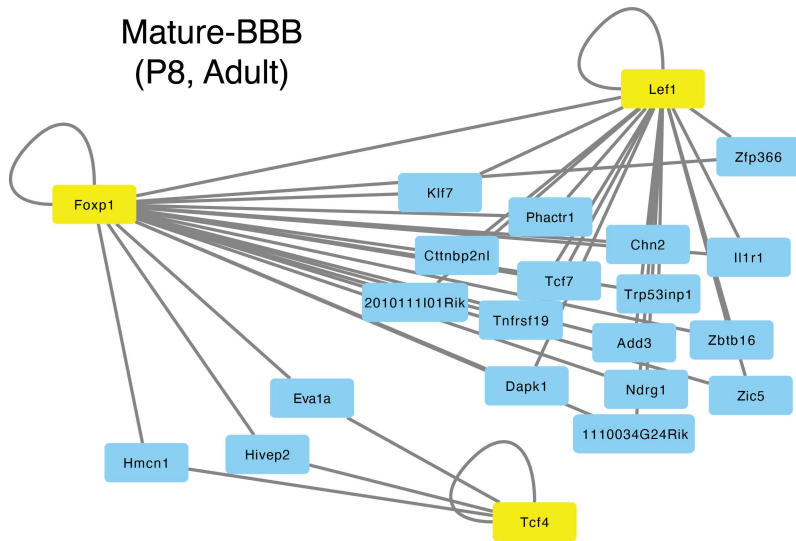**Supplemental Figure 7**

**A**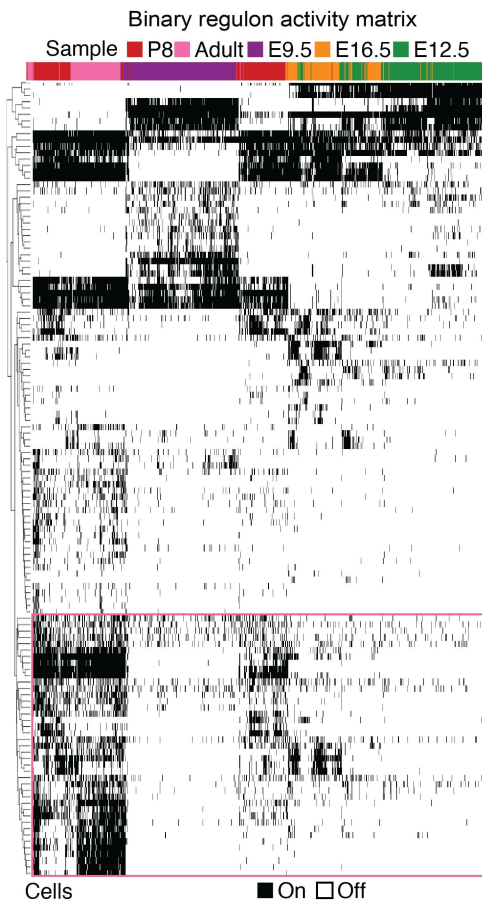**B**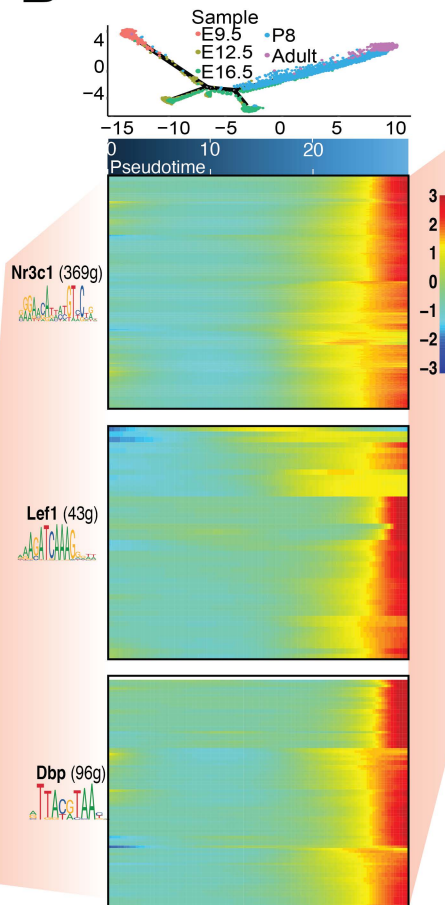**C**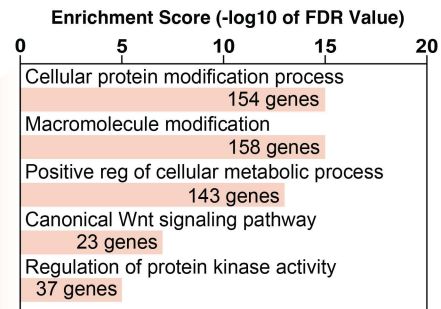**Supplemental Figure 8**





964 **FIGURE LEGENDS**

965

966 **Figure 1: Isolation and Characterization of Tissue-Specific Endothelial Signatures**  
967 **Throughout Development.**

968 A) Workflow for genetic affinity tag labelling of ECs using *Cdh5(PAC)-CreERT2* and  
969 *R26<sup>Sun1-sfGFP</sup>* mice for isolation of nuclei tagged in specific cell types (INTACT). (Far left)  
970 Representative schematic of a blood vessel with GFP-tagged nuclei. Nuclear isolation  
971 was followed by RNA-seq profiling of nuclear transcripts and ATAC-seq mapping of  
972 accessible chromatin and aligning reads to the mouse genome (far right). B) (Far left)  
973 Various tissues and time points used to map endothelial cell diversity in the developing  
974 (E12.5), postnatal (P6) and adult (2 months of age) mouse. (Far right) Representative  
975 genome browser tracks from ATAC-seq highlight accessible chromatin regions unique  
976 to organ-specific genes like *Map2* in neurons, *Tnnt2* in cardiomyocytes, *Alb* in  
977 hepatocytes, *Sftpc* in alveolar cells of the lung, and *Kap* in proximal tubule cells of the  
978 kidney, and endothelial cells including *Cdh5*, *Pecam1* and *Erg*. C) Volcano plots show  
979 differentially expressed genes between the endothelium (red) and input nuclei (blue). All  
980 developmental timepoints (E12.5-Adult) are combined and treated as a single timepoint  
981 for these analyses.

982

983 **Figure 2: Endothelial Cells from Diverse Organs Share a Core Epigenetic**  
984 **Signature.**

985 A) Venn diagram showing the overlap of open chromatin regions (2,646 peaks)  
986 between murine heart, kidney, liver, lung, retina, and brain endothelium. B) Heatmap of



987 shared peaks across the endothelial and input datasets. C) GREAT analysis of common  
988 peaks showing gene ontology terms related to cardiovascular development and  
989 angiogenesis, among others. D) Top 20 transcription factor DNA binding motifs in  
990 shared peaks along with their p-value as determined using HOMER. E) Top, position  
991 weight matrix (PWM) for transcription factor DNA binding sites, with the inset box  
992 showing the frequency of motif occurrence as distance from the center of the peak  
993 within accessible DNA regions as determined by ATAC-seq. F) Representative genome  
994 browser tracks from ATAC-seq data highlighting accessible chromatin regions in the  
995 adult endothelium and representative DNA binding sites (red rectangle) for the  
996 transcription factors identified in panel F for the *Delta Like 4 (Dll4)* and *Endoglin (Eng)*  
997 loci.

998

999 **Figure 3: Profiling Accessible Chromatin and Expressed Transcripts Identifies**

1000 **Organ-Specific Endothelial Signatures.**

1001 A) A heatmap shows differentially accessible regions of open chromatin in the murine  
1002 brain, retina, heart, liver, lung, and kidney endothelium (45,075 peaks) identified by  
1003 ATAC-seq. B) Top biological processes from GREAT analysis across differentially  
1004 accessible peaks in each organ. Only regions annotated to endothelial enriched genes  
1005 (determined by RNA-sequencing) were used in the analysis. C) Top transcription factor  
1006 motifs in regions of open chromatin in the brain and heart. D) Enriched motifs found by  
1007 HOMER in each organ. Position weight matrix (PWM) shown over frequency of motif as  
1008 distance from peak center. E) Representative genome browser tracks from ATAC-seq

1009 highlighting accessible organ-specific chromatin regions in endothelial-enriched  
1010 transcripts.

1011

1012 **Figure 4: Chromatin Accessibility Changes Across Time in the Brain**

1013 **Endothelium.**

1014 A) Differential chromatin accessibility determined by ATAC-Seq within the brain and  
1015 retinal endothelium (6,540 peaks) of E12.5, postnatal day 6 (P6) and adult mice. B) Top  
1016 biological processes from GREAT analysis across differentially accessible peaks at  
1017 each timepoint. C) Top 20 transcription factors ranked by expression for each age. Log2  
1018 expression over input indicated in the y-axis. Motif enrichment p-value is shown  
1019 according to the size of the bubble. D) Normalized gene expression in either E12.5, P6  
1020 or adult brain and retina endothelium (top) and genomic tracks for endothelial and input  
1021 brain samples for genes upregulated in E12.5 (*Adm*), P6 (*Tnc*) or adult (*Slc9a2*). Unique  
1022 peaks to those timepoints are indicated by the transparent vertical yellow bar, and DNA  
1023 binding sites of the top 20 transcription factor motifs that are present in such peaks are  
1024 indicated below.

1025

1026 **Figure 5: Maturation of Blood Brain Barrier at Single Cell Resolution.**

1027 A) Schematic representation of the harvesting and isolation of endothelial cells from  
1028 E9.5, E12.5, E16.5, P8 and adult mice. Cells were purified using Magnetic Isolation  
1029 Cells Sorting (MACS) and processed for downstream sequencing and analysis following  
1030 the 10x Genomics protocol. B) UMAP representation of total cells sequenced from all  
1031 timepoints. C) Clustering annotation and identity of the cell types sequenced. D)

1032 Feature plot showing *Cdh5* expression enrichment in the endothelial cell cluster. E)  
1033 Heatmap of differential gene expression analysis of endothelial cells from each  
1034 timepoint. Genes in red have a known role in blood brain barrier function. Top 10 genes  
1035 are shown, followed by *Pecam1*, *Cldn5* and *Kdr*. F) Monocle pseudotime analysis of all  
1036 endothelial cells from all timepoints, with E9.5 set as the point of origin. The pseudotime  
1037 gradient is shown on top and the corresponding timepoints are color coded below. G)  
1038 Heatmap showing expression dynamics of selected gene markers for mitosis or blood  
1039 brain barrier development markers superimposed on the pseudotime axis.

1040

#### 1041 **Figure 6: Gene Regulatory Networks Involved in Blood Brain Barrier**

1042 **Development.** A) The SCENIC (Aibar et al., 2017) analysis pipeline. scRNA-Seq co-  
1043 expression modules between (1) TFs and (2) candidate target genes are inferred using  
1044 GRNBoost. RCis Target then identifies modules for transcription factor DNA-binding  
1045 motifs that are enriched across the target genes to create a “regulon” of direct targets.  
1046 AUCell scores the activity of each regulon in every single cell, generating a binary  
1047 activity matrix to predict cell states. B) SCENIC binary activity heatmap representing  
1048 active regulons in brain endothelial cells across all timepoints. Vertical columns  
1049 represent individual sequenced cells, while each horizontal row represents an individual  
1050 regulon. Highlighted regulons are shown in panel C. C) Heatmaps show differentially  
1051 active regulon target gene expression in the cerebral endothelium at E9.5 and E12.5  
1052 (green shading) compared to E16.5, P8 and adult (blue shading) and P8 and adult  
1053 (orange shading), all superimposed upon the pseudotime gradient from Figure 6G. D)

1054 Selected GO biological processes derived from the target genes expressed in each of  
1055 the three regulon clusters shown in panel C.

1056

1057 **Figure 7: Vessel Specific Changes in Regulon Activity in the Brain Endothelium**

1058 **During Development.** A) SCENIC binary activity heatmap representing active regulons  
1059 across endothelial cell timepoints, with the FOXP1 and LEF1 regulons active in the P8  
1060 and adult brain endothelium indicated on the right. B) UMAP representation of all  
1061 endothelial cells labelled by timepoint (left) and by endothelial subtype corresponding to  
1062 arterial ECs, capillary-arterial (Capillary-A), capillary-venous (Capillary-V), venous,  
1063 mitotic and tip-cells at E12.5 (middle) and in the adult brain (right). C) Feature plot  
1064 showing expression of marker genes with enriched expression in each cluster. A  
1065 heatmap shows the top 5 differentially expressed genes from each cluster from the  
1066 E12.5 (D) and adult (E) brain endothelium. Heatmaps showing expression of LEF1 and  
1067 FOXP1 regulon targets in the E12.5 (F) and adult (G) brain endothelium.

1068

1069 **Figure 8: Evolutionary Conservation of Regions of Open Chromatin Between**

1070 **Human and Adult Mouse.** A) Diagram representing the total number of open chromatin  
1071 regions in hCMEC/D3 that are conserved in the adult murine brain endothelium (shown  
1072 in Figure 4). B) Selected known transcription factor DNA binding motifs in conserved  
1073 peaks along with their p-value after analysis by HOMER. C) GO term analysis of genes  
1074 with conserved nearby accessible chromatin regions that are also expressed in both  
1075 human hCMEC/D3 cells and adult murine brain endothelium. D) Representative  
1076 genome browser tracks of *Slc31a* and *Mfsd2a* highlighting (in yellow) conserved

1077 accessible chromatin regions in human (top) and murine (bottom) as defined by ATAC-  
1078 seq and Omni-ATAC-seq. Transcription factor motifs present in the highlighted peak are  
1079 shown above. Conservation at the nucleotide level within each highlighted peak is  
1080 shown below each locus.

1081

1082 **Supplemental Figure 1. Top 50 Motifs Across all Organs.** A) Enriched motifs  
1083 identified by HOMER from all organs, with all timepoints condensed into one sample per  
1084 organ. Size of the bubble and the color represent the p-value. The top 50 motifs are  
1085 shown.

1086

1087 **Supplemental Figure 2. Chromatin Accessibility Changes Across Time in the**  
1088 **Heart Endothelium.** A) Differential chromatin accessibility determined by ATAC-Seq  
1089 peaks in the heart endothelium (11,079 peaks) at E12.5, postnatal day 6 (P6) and adult  
1090 (2-month-old) mice. B) Biological processes from expressed genes and with accessible  
1091 chromatin in each timepoint. C) Top 10 transcription factor motifs ranked by gene  
1092 expression for each age. Log<sub>2</sub> expression over input indicated in the y-axis. Motif  
1093 enrichment p-value is shown according to the dot size.

1094

1095 **Supplemental Figure 3. Chromatin Accessibility Changes Across Time in the**  
1096 **Liver Endothelium.** A) Differential chromatin accessibility determined by ATAC-Seq  
1097 peaks in the liver endothelium (8,666 peaks) at E12.5, postnatal day 6 (P6) and adult  
1098 (2-month-old) mice. B) Biological processes from expressed genes and with accessible  
1099 chromatin in each timepoint. C) Top 10 transcription factor motifs ranked by gene

1100 expression for each age. Log2 expression over input indicated in the y-axis. Motif  
1101 enrichment p-value is shown according to the dot size.

1102

1103 **Supplemental Figure 4. Chromatin Accessibility Changes Across Time in the**

1104 **Lung Endothelium.** A) Differential chromatin accessibility determined by ATAC-Seq

1105 peaks in the lung endothelium (1,731 peaks) at E12.5, postnatal day 6 (P6) and adult

1106 (2-month-old) mice. B) Biological processes from expressed genes and with accessible

1107 chromatin in each timepoint. C) Top 10 transcription factor motifs ranked by gene

1108 expression for each age. Log2 expression over input indicated in the y-axis. Motif

1109 enrichment p-value is shown according to the dot size.

1110

1111 **Supplemental Figure 5. Chromatin Accessibility Changes Across Time in the**

1112 **Kidney Endothelium.** A) Differential chromatin accessibility determined by ATAC-Seq

1113 peaks in the kidney endothelium (3,035 peaks) at E12.5, postnatal day 6 (P6) and adult

1114 (2-month-old) mice. B) Biological processes from expressed genes and with accessible

1115 chromatin in each timepoint. C) Top 10 transcription factor motifs ranked by gene

1116 expression for each age. Log2 expression over input indicated in the y-axis. Motif

1117 enrichment p-value is shown according to the dot size.

1118

1119 **Supplemental Figure 6. Classification of Major Cell Types Using Single Cell**

1120 **Sequencing.** A) UMAP representation of different cell type clusters across timepoints.

1121 B) UMAP visualization of marker genes in selected clusters. C) Heatmap of the top 10

1122 differentially expressed genes across cell types. D) Violin plots showing gene  
1123 expression distribution of two canonical gene markers for each cell type.

1124

1125 **Supplemental Figure 7. Common Target Genes in Active Regulons within the**  
1126 **Developing and Mature Brain Endothelium.** Interaction network constructed from the  
1127 top 3 regulons, as determined by SCENIC, of the E16.5, P8 and adult (A) or P8 and  
1128 adult only (B) brain endothelium. Genes regulated by 2 or more transcription factors are  
1129 shown.

1130

1131 **Supplemental Figure 8. Mature BBB Regulon Activity Across Time and Gene**  
1132 **Ontology Analysis.** A) SCENIC binary activity heatmap representing active regulons in  
1133 brain endothelial cells across all timepoints. Highlighted regulons are shown in panel B.  
1134 B) Heatmaps show differentially active regulon target gene expression in the cerebral  
1135 endothelium in P8 and adult. C) Selected GO biological processes derived from the  
1136 target genes expressed by the three regulon clusters shown in panel B.

1137

1138 **Supplemental Figure 9. Cell to Cell Communication Changes in the Neurovascular**  
1139 **Unit Over Time.** A) Circos plot of differentially expressed ligands in non-EC cells within  
1140 our dataset, as well as their target genes expressed in the CNS endothelium between  
1141 E9.5 and Adult. F) Unbiased analysis of top predicted interactions of differentially  
1142 expressed ligands and receptors between ECs and pericytes in E9.5 and adult using  
1143 the Cell-Cell Interactions (CCInx).

1144

1145 **Supplemental Table 1. List of samples sequenced. Shared endothelial peaks**  
1146 **across organs and timepoints. Gene Ontology (GO) terms and HOMER Motifs**  
1147 **associated with shared peaks. Erg and Fli1 motif annotated peaks (associated**  
1148 **with Figure 2).**

1149

1150 **Supplemental Table 2. Organ specific peaks and associated genes. Gene**  
1151 **Ontology (GO) terms for each organ (associated with Figure 3).**

1152

1153 **Supplemental Table 3. Lef1, Nfat, Gata4, Foxo3 and Hoxc9 annotated target peaks**  
1154 **(associated with Figure 3).**

1155

1156 **Supplemental Table 4. E12.5, P6 and adult brain peaks, annotated target genes**  
1157 **and Gene Ontology (GO) terms associated with it (associated with Figure 4).**

1158

1159 **Supplemental Table 5. Differentially expressed genes in annotated single cell**  
1160 **clusters. Differentially expressed genes in endothelial cells across timepoints**  
1161 **(associated with Figure 5).**

1162

1163 **Supplemental Table 6. Target genes of selected regulons and Gene Ontology**  
1164 **(GO) terms divided by developmental stage (associated with Figure 6).**

1165

1166 **Supplemental Table 7. Conserved ATAC regions between hCMEC/D3 cells and**  
1167 **adult mouse brain endothelium with HOMER motif analysis.**



1168 **SUPPLEMENTAL MATERIALS AND METHODS**

1169

1170 **Table S1: Primers used for murine genotyping**

| <b>MGI #</b> | <b>Allele</b>                                  | <b>Forward 5'-3'</b>        | <b>Reverse 5'-3'</b>        | <b>Band Size</b> |
|--------------|------------------------------------------------|-----------------------------|-----------------------------|------------------|
| 5443817      | <i>R26<sup>Sun1</sup></i><br><i>WT allele</i>  | CTC TGC TGC CTC CTG GCT TCT | CGA GGC GGA TCA CAA GCA ATA | 330<br>bp        |
| 5443817      | <i>R26<sup>Sun1</sup></i><br><i>GFP allele</i> | CTC TGC TGC CTC CTG GCT TCT | TCA ATG GGC GGG GGT CGT T   | 250<br>bp        |
| 3848982      | <i>Cdh5-</i><br><i>PAC-</i><br><i>CreERT2</i>  | TCCTGATGGTGCCTATCCTC        | CCTGTTTTGCACGTTACCG         | 548<br>bp        |

1171

1172

1173

1174

1175

1176

1177

1178

1179

1180

1181

1182

1183

1184

1185

1186

1187

1188 **REFERENCES CITED**

- 1189 Abedin, M.J., Nguyen, A., Jiang, N., Perry, C.E., Shelton, J.M., Watson, D.K., Ferdous,  
1190 A., 2014. Fli1 acts downstream of Etv2 to govern cell survival and vascular homeostasis  
1191 via positive autoregulation. *Circ Res* 114, 1690-1699.
- 1192 Abramsson, A., Kurup, S., Busse, M., Yamada, S., Lindblom, P., Schallmeiner, E.,  
1193 Stenzel, D., Sauvaget, D., Ledin, J., Ringvall, M., Landegren, U., Kjellen, L., Bondjers,  
1194 G., Li, J.P., Lindahl, U., Spillmann, D., Betsholtz, C., Gerhardt, H., 2007. Defective N-  
1195 sulfation of heparan sulfate proteoglycans limits PDGF-BB binding and pericyte  
1196 recruitment in vascular development. *Genes Dev* 21, 316-331.
- 1197 Adelman, K., Lis, J.T., 2012. Promoter-proximal pausing of RNA polymerase II:  
1198 emerging roles in metazoans. *Nat Rev Genet* 13, 720-731.
- 1199 Ahmed, K.M., Pandita, R.K., Singh, D.K., Hunt, C.R., Pandita, T.K., 2018. beta1-Integrin  
1200 Impacts Rad51 Stability and DNA Double-Strand Break Repair by Homologous  
1201 Recombination. *Mol Cell Biol* 38.
- 1202 Aibar, S., Gonzalez-Blas, C.B., Moerman, T., Huynh-Thu, V.A., Imrichova, H.,  
1203 Hulselmans, G., Rambow, F., Marine, J.C., Geurts, P., Aerts, J., van den Oord, J., Atak,  
1204 Z.K., Wouters, J., Aerts, S., 2017. SCENIC: single-cell regulatory network inference and  
1205 clustering. *Nat Methods* 14, 1083-1086.
- 1206 Aird, W.C., 2007. Phenotypic heterogeneity of the endothelium: I. Structure, function,  
1207 and mechanisms. *Circ Res* 100, 158-173.
- 1208 Aird, W.C., 2012. Endothelial cell heterogeneity. *Cold Spring Harb Perspect Med* 2,  
1209 a006429.
- 1210 Aird, W.C., Edelberg, J.M., Weiler-Guettler, H., Simmons, W.W., Smith, T.W.,  
1211 Rosenberg, R.D., 1997. Vascular bed-specific expression of an endothelial cell gene is  
1212 programmed by the tissue microenvironment. *J Cell Biol* 138, 1117-1124.
- 1213 Akanuma, S., Hirose, S., Tachikawa, M., Hosoya, K., 2013. Localization of organic  
1214 anion transporting polypeptide (Oatp) 1a4 and Oatp1c1 at the rat blood-retinal barrier.  
1215 *Fluids Barriers CNS* 10, 29.
- 1216 Al Argan, R., Saskin, A., Yang, J.W., D'Agostino, M.D., Rivera, J., 2018. Glucocorticoid  
1217 resistance syndrome caused by a novel NR3C1 point mutation. *Endocr J* 65, 1139-  
1218 1146.
- 1219 Amin, M.A., Volpert, O.V., Woods, J.M., Kumar, P., Harlow, L.A., Koch, A.E., 2003.  
1220 Migration inhibitory factor mediates angiogenesis via mitogen-activated protein kinase  
1221 and phosphatidylinositol kinase. *Circ Res* 93, 321-329.

- 1222 Andreone, B.J., Chow, B.W., Tata, A., Lacoste, B., Ben-Zvi, A., Bullock, K., Deik, A.A.,  
1223 Ginty, D.D., Clish, C.B., Gu, C., 2017. Blood-Brain Barrier Permeability Is Regulated by  
1224 Lipid Transport-Dependent Suppression of Caveolae-Mediated Transcytosis. *Neuron*  
1225 94, 581-594 e585.
- 1226 Anney, P., Theriault, M., Proulx, S., 2021. Hydrodynamic forces influence the gene  
1227 transcription of mechanosensitive intercellular junction associated genes in corneal  
1228 endothelial cells. *Exp Eye Res* 206, 108532.
- 1229 Aranguren, X.L., Agirre, X., Beerens, M., Coppiello, G., Uriz, M., Vandersmissen, I.,  
1230 Benkheil, M., Panadero, J., Aguado, N., Pascual-Montano, A., Segura, V., Prosper, F.,  
1231 Luttun, A., 2013. Unraveling a novel transcription factor code determining the human  
1232 arterial-specific endothelial cell signature. *Blood* 122, 3982-3992.
- 1233 Argaw, A.T., Gurfein, B.T., Zhang, Y., Zameer, A., John, G.R., 2009. VEGF-mediated  
1234 disruption of endothelial CLN-5 promotes blood-brain barrier breakdown. *Proc Natl*  
1235 *Acad Sci U S A* 106, 1977-1982.
- 1236 Asano, Y., Stawski, L., Hant, F., Highland, K., Silver, R., Szalai, G., Watson, D.K.,  
1237 Trojanowska, M., 2010. Endothelial Fli1 deficiency impairs vascular homeostasis: a role  
1238 in scleroderma vasculopathy. *Am J Pathol* 176, 1983-1998.
- 1239 Augustin, H.G., Koh, G.Y., 2017. Organotypic vasculature: From descriptive  
1240 heterogeneity to functional pathophysiology. *Science* 357.
- 1241 Balbas, M.D., Burgess, M.R., Murali, R., Wongvipat, J., Skaggs, B.J., Mundel, P.,  
1242 Weins, A., Sawyers, C.L., 2014. MAGI-2 scaffold protein is critical for kidney barrier  
1243 function. *Proc Natl Acad Sci U S A* 111, 14876-14881.
- 1244 Ben-Zvi, A., Lacoste, B., Kur, E., Andreone, B.J., Mayshar, Y., Yan, H., Gu, C., 2014.  
1245 *Mfsd2a* is critical for the formation and function of the blood-brain barrier. *Nature* 509,  
1246 507-511.
- 1247 Benz, F., Wichitnaowarat, V., Lehmann, M., Germano, R.F., Mihova, D., Macas, J.,  
1248 Adams, R.H., Taketo, M.M., Plate, K.H., Guerit, S., Vanhollebeke, B., Liebner, S., 2019.  
1249 Low wnt/beta-catenin signaling determines leaky vessels in the subfornical organ and  
1250 affects water homeostasis in mice. *Elife* 8.
- 1251 Birdsey, G.M., Dryden, N.H., Amsellem, V., Gebhardt, F., Sahnun, K., Haskard, D.O.,  
1252 Dejana, E., Mason, J.C., Randi, A.M., 2008. Transcription factor Erg regulates  
1253 angiogenesis and endothelial apoptosis through VE-cadherin. *Blood* 111, 3498-3506.
- 1254 Birdsey, G.M., Shah, A.V., Duffon, N., Reynolds, L.E., Osuna Almagro, L., Yang, Y.,  
1255 Aspalter, I.M., Khan, S.T., Mason, J.C., Dejana, E., Gottgens, B., Hodivala-Dilke, K.,  
1256 Gerhardt, H., Adams, R.H., Randi, A.M., 2015. The endothelial transcription factor ERG

- 1257 promotes vascular stability and growth through Wnt/beta-catenin signaling. *Dev Cell* 32,  
1258 82-96.
- 1259 Bischoff, J.R., Plowman, G.D., 1999. The Aurora/lpl1p kinase family: regulators of  
1260 chromosome segregation and cytokinesis. *Trends Cell Biol* 9, 454-459.
- 1261 Blighe K, R.S., Lewis M, 2021. EnhancedVolcano: Publication-ready volcano plots with  
1262 enhanced colouring and labeling., R package version 1.10.0 ed.
- 1263 Boldajipour, B., Mahabaleshwar, H., Kardash, E., Reichman-Fried, M., Blaser, H.,  
1264 Minina, S., Wilson, D., Xu, Q., Raz, E., 2008. Control of chemokine-guided cell  
1265 migration by ligand sequestration. *Cell* 132, 463-473.
- 1266 Boogerd, C.J., Wong, L.Y., van den Boogaard, M., Bakker, M.L., Tessadori, F.,  
1267 Bakkers, J., t Hoen, P.A., Moorman, A.F., Christoffels, V.M., Barnett, P., 2011. Sox4  
1268 mediates Tbx3 transcriptional regulation of the gap junction protein Cx43. *Cell Mol Life*  
1269 *Sci* 68, 3949-3961.
- 1270 Booth, D.G., Takagi, M., Sanchez-Pulido, L., Petfalski, E., Vargiu, G., Samejima, K.,  
1271 Imamoto, N., Ponting, C.P., Tollervey, D., Earnshaw, W.C., Vagnarelli, P., 2014. Ki-67  
1272 is a PP1-interacting protein that organises the mitotic chromosome periphery. *Elife* 3,  
1273 e01641.
- 1274 Browaeys, R., Saelens, W., Saeys, Y., 2020. NicheNet: modeling intercellular  
1275 communication by linking ligands to target genes. *Nat Methods* 17, 159-162.
- 1276 Buenrostro, J.D., Giresi, P.G., Zaba, L.C., Chang, H.Y., Greenleaf, W.J., 2013.  
1277 Transposition of native chromatin for fast and sensitive epigenomic profiling of open  
1278 chromatin, DNA-binding proteins and nucleosome position. *Nat Methods* 10, 1213-  
1279 1218.
- 1280 Buenrostro, J.D., Wu, B., Chang, H.Y., Greenleaf, W.J., 2015. ATAC-seq: A Method for  
1281 Assaying Chromatin Accessibility Genome-Wide. *Curr Protoc Mol Biol* 109, 21.29.21-  
1282 21.29.29.
- 1283 Burridge, K.A., Friedman, M.H., 2010. Environment and vascular bed origin influence  
1284 differences in endothelial transcriptional profiles of coronary and iliac arteries. *Am J*  
1285 *Physiol Heart Circ Physiol* 299, H837-846.
- 1286 Cai, Y., Bolte, C., Le, T., Goda, C., Xu, Y., Kalin, T.V., Kalinichenko, V.V., 2016. FOXF1  
1287 maintains endothelial barrier function and prevents edema after lung injury. *Sci Signal* 9,  
1288 ra40.
- 1289 Calero, M., Rostagno, A., Ghiso, J., 2012. Search for amyloid-binding proteins by  
1290 affinity chromatography. *Methods Mol Biol* 849, 213-223.

- 1291 Carmeliet, P., Jain, R.K., 2000. Angiogenesis in cancer and other diseases. *Nature* 407,  
1292 249-257.
- 1293 Castano, J., Aranda, S., Bueno, C., Calero-Nieto, F.J., Mejia-Ramirez, E., Mosquera,  
1294 J.L., Blanco, E., Wang, X., Prieto, C., Zabaleta, L., Mereu, E., Rovira, M., Jimenez-  
1295 Delgado, S., Matson, D.R., Heyn, H., Bresnick, E.H., Gottgens, B., Di Croce, L.,  
1296 Menendez, P., Raya, A., Giorgetti, A., 2019. GATA2 Promotes Hematopoietic  
1297 Development and Represses Cardiac Differentiation of Human Mesoderm. *Stem Cell*  
1298 *Reports* 13, 515-529.
- 1299 Chiang, I.K., Fritzsche, M., Pichol-Thievend, C., Neal, A., Holmes, K., Lagendijk, A.,  
1300 Overman, J., D'Angelo, D., Omini, A., Hermkens, D., Lesieur, E., Fossat, N., Radziewicz,  
1301 T., Liu, K., Ratnayaka, I., Corada, M., Bou-Gharios, G., Tam, P.P.L., Carroll, J., Dejana,  
1302 E., Schulte-Merker, S., Hogan, B.M., Beltrame, M., De Val, S., Francois, M., 2017.  
1303 Correction: SoxF factors induce Notch1 expression via direct transcriptional regulation  
1304 during early arterial development. *Development* doi: 10.1242/dev.146241. *Development*  
1305 144, 3847-3848.
- 1306 Chiquet-Ehrismann, R., Tucker, R.P., 2011. Tenascins and the importance of adhesion  
1307 modulation. *Cold Spring Harb Perspect Biol* 3.
- 1308 Christiansen, G.B., Andersen, K.H., Riis, S., Nykjaer, A., Bolcho, U., Jensen, M.S.,  
1309 Holm, M.M., 2017. The sorting receptor SorCS3 is a stronger regulator of glutamate  
1310 receptor functions compared to GABAergic mechanisms in the hippocampus.  
1311 *Hippocampus* 27, 235-248.
- 1312 Churg, J., Grishman, E., 1975. Ultrastructure of glomerular disease: a review. *Kidney Int*  
1313 7, 254-261.
- 1314 Cleuren, A.C.A., van der Ent, M.A., Jiang, H., Hunker, K.L., Yee, A., Siemieniak, D.R.,  
1315 Molema, G., Aird, W.C., Ganesh, S.K., Ginsburg, D., 2019. The in vivo endothelial cell  
1316 translome is highly heterogeneous across vascular beds. *Proc Natl Acad Sci U S A*  
1317 116, 23618-23624.
- 1318 Corada, M., Orsenigo, F., Morini, M.F., Pitulescu, M.E., Bhat, G., Nyqvist, D., Breviario,  
1319 F., Conti, V., Briot, A., Iruela-Arispe, M.L., Adams, R.H., Dejana, E., 2013. Sox17 is  
1320 indispensable for acquisition and maintenance of arterial identity. *Nat Commun* 4, 2609.
- 1321 Corces, M.R., Trevino, A.E., Hamilton, E.G., Greenside, P.G., Sinnott-Armstrong, N.A.,  
1322 Vesuna, S., Satpathy, A.T., Rubin, A.J., Montine, K.S., Wu, B., Kathiria, A., Cho, S.W.,  
1323 Mumbach, M.R., Carter, A.C., Kasowski, M., Orloff, L.A., Risca, V.I., Kundaje, A.,  
1324 Khavari, P.A., Montine, T.J., Greenleaf, W.J., Chang, H.Y., 2017. An improved ATAC-  
1325 seq protocol reduces background and enables interrogation of frozen tissues. *Nat*  
1326 *Methods* 14, 959-962.

- 1327 Crawford, G.E., Holt, I.E., Whittle, J., Webb, B.D., Tai, D., Davis, S., Margulies, E.H.,  
1328 Chen, Y., Bernat, J.A., Ginsburg, D., Zhou, D., Luo, S., Vasicek, T.J., Daly, M.J.,  
1329 Wolfsberg, T.G., Collins, F.S., 2006. Genome-wide mapping of DNase hypersensitive  
1330 sites using massively parallel signature sequencing (MPSS). *Genome Res* 16, 123-131.
- 1331 Danecek, P., Bonfield, J.K., Liddle, J., Marshall, J., Ohan, V., Pollard, M.O., Whitwham,  
1332 A., Keane, T., McCarthy, S.A., Davies, R.M., Li, H., 2021. Twelve years of SAMtools  
1333 and BCFtools. *Gigascience* 10.
- 1334 Daneman, R., Agalliu, D., Zhou, L., Kuhnert, F., Kuo, C.J., Barres, B.A., 2009.  
1335 Wnt/beta-catenin signaling is required for CNS, but not non-CNS, angiogenesis. *Proc*  
1336 *Natl Acad Sci U S A* 106, 641-646.
- 1337 de Haan, W., Oie, C., Benkheil, M., Dheedene, W., Vinckier, S., Coppiello, G.,  
1338 Aranguren, X.L., Beerens, M., Jaekers, J., Topal, B., Verfaillie, C., Smedsrod, B.,  
1339 Luttun, A., 2020. Unraveling the transcriptional determinants of liver sinusoidal  
1340 endothelial cell specialization. *Am J Physiol Gastrointest Liver Physiol* 318, G803-G815.
- 1341 de la Pompa, J.L., Timmerman, L.A., Takimoto, H., Yoshida, H., Elia, A.J., Samper, E.,  
1342 Potter, J., Wakeham, A., Marengere, L., Langille, B.L., Crabtree, G.R., Mak, T.W., 1998.  
1343 Role of the NF-ATc transcription factor in morphogenesis of cardiac valves and septum.  
1344 *Nature* 392, 182-186.
- 1345 de Pater, E., Kaimakis, P., Vink, C.S., Yokomizo, T., Yamada-Inagawa, T., van der  
1346 Linden, R., Kartalaei, P.S., Camper, S.A., Speck, N., Dzierzak, E., 2013. Gata2 is  
1347 required for HSC generation and survival. *J Exp Med* 210, 2843-2850.
- 1348 De Val, S., Black, B.L., 2009. Transcriptional control of endothelial cell development.  
1349 *Dev Cell* 16, 180-195.
- 1350 Deal, R.B., Henikoff, S., 2010. A simple method for gene expression and chromatin  
1351 profiling of individual cell types within a tissue. *Dev Cell* 18, 1030-1040.
- 1352 Dieterich, L.C., Tacconi, C., Menzi, F., Proulx, S.T., Kapaklikaya, K., Hamada, M.,  
1353 Takahashi, S., Detmar, M., 2020. Lymphatic MAFB regulates vascular patterning during  
1354 developmental and pathological lymphangiogenesis. *Angiogenesis* 23, 411-423.
- 1355 Dogan, N., Wu, W., Morrissey, C.S., Chen, K.B., Stonestrom, A., Long, M., Keller, C.A.,  
1356 Cheng, Y., Jain, D., Visel, A., Pennacchio, L.A., Weiss, M.J., Blobel, G.A., Hardison,  
1357 R.C., 2015. Occupancy by key transcription factors is a more accurate predictor of  
1358 enhancer activity than histone modifications or chromatin accessibility. *Epigenetics*  
1359 *Chromatin* 8, 16.
- 1360 Duan, Q., Ni, L., Wang, P., Chen, C., Yang, L., Ma, B., Gong, W., Cai, Z., Zou, M.H.,  
1361 Wang, D.W., 2016. Deregulation of XBP1 expression contributes to myocardial vascular



- 1362 endothelial growth factor-A expression and angiogenesis during cardiac hypertrophy in  
1363 vivo. *Aging Cell* 15, 625-633.
- 1364 Dumas, S.J., Meta, E., Borri, M., Goveia, J., Rohlenova, K., Conchinha, N.V.,  
1365 Falkenberg, K., Teuwen, L.A., de Rooij, L., Kalucka, J., Chen, R., Khan, S., Taverna, F.,  
1366 Lu, W., Parys, M., De Legher, C., Vinckier, S., Karakach, T.K., Schoonjans, L., Lin, L.,  
1367 Bolund, L., Dewerchin, M., Eelen, G., Rabelink, T.J., Li, X., Luo, Y., Carmeliet, P., 2020.  
1368 Single-Cell RNA Sequencing Reveals Renal Endothelium Heterogeneity and Metabolic  
1369 Adaptation to Water Deprivation. *J Am Soc Nephrol* 31, 118-138.
- 1370 Engelbrecht, E., Levesque, M.V., He, L., Vanlandewijck, M., Nitzsche, A., Niazi, H.,  
1371 Kuo, A., Singh, S.A., Aikawa, M., Holton, K., Proia, R.L., Kono, M., Pu, W.T., Camerer,  
1372 E., Betsholtz, C., Hla, T., 2020. Sphingosine 1-phosphate-regulated transcriptomes in  
1373 heterogenous arterial and lymphatic endothelium of the aorta. *Elife* 9.
- 1374 Fan, C., Ouyang, P., Timur, A.A., He, P., You, S.A., Hu, Y., Ke, T., Driscoll, D.J., Chen,  
1375 Q., Wang, Q.K., 2009. Novel roles of GATA1 in regulation of angiogenic factor AGGF1  
1376 and endothelial cell function. *J Biol Chem* 284, 23331-23343.
- 1377 Feng, J., Yano, K., Monahan-Earley, R., Morgan, E.S., Dvorak, A.M., Sellke, F.W., Aird,  
1378 W.C., 2007. Vascular bed-specific endothelium-dependent vasomotor relaxation in  
1379 the hagfish, *Myxine glutinosa*. *Am J Physiol Regul Integr Comp Physiol* 293, R894-900.
- 1380 Feng, W., Chen, L., Nguyen, P.K., Wu, S.M., Li, G., 2019. Single Cell Analysis of  
1381 Endothelial Cells Identified Organ-Specific Molecular Signatures and Heart-Specific Cell  
1382 Populations and Molecular Features. *Front Cardiovasc Med* 6, 165.
- 1383 Fish, J.E., Cantu Gutierrez, M., Dang, L.T., Khyzha, N., Chen, Z., Veitch, S., Cheng,  
1384 H.S., Khor, M., Antounians, L., Njock, M.S., Boudreau, E., Herman, A.M., Rhyner, A.M.,  
1385 Ruiz, O.E., Eisenhoffer, G.T., Medina-Rivera, A., Wilson, M.D., Wythe, J.D., 2017.  
1386 Dynamic regulation of VEGF-inducible genes by an ERK/ERG/p300 transcriptional  
1387 network. *Development* 144, 2428-2444.
- 1388 Fish, J.E., Wythe, J.D., 2015. The molecular regulation of arteriovenous specification  
1389 and maintenance. *Dev Dyn* 244, 391-409.
- 1390 Franken, P., Lopez-Molina, L., Marcacci, L., Schibler, U., Tafti, M., 2000. The  
1391 Transcription Factor DBP Affects Circadian Sleep Consolidation and Rhythmic EEG  
1392 Activity. *The Journal of Neuroscience* 20, 617-625.
- 1393 Gaengel, K., Genove, G., Armulik, A., Betsholtz, C., 2009. Endothelial-mural cell  
1394 signaling in vascular development and angiogenesis. *Arterioscler Thromb Vasc Biol* 29,  
1395 630-638.
- 1396 Gasper, W.C., Marinov, G.K., Pauli-Behn, F., Scott, M.T., Newberry, K., DeSalvo, G.,  
1397 Ou, S., Myers, R.M., Vielmetter, J., Wold, B.J., 2014. Fully automated high-throughput



- 1398 chromatin immunoprecipitation for ChIP-seq: identifying ChIP-quality p300 monoclonal  
1399 antibodies. *Sci Rep* 4, 5152.
- 1400 Geraud, C., Koch, P.S., Zierow, J., Klapproth, K., Busch, K., Olsavszky, V., Leibing, T.,  
1401 Demory, A., Ulbrich, F., Dieltz, M., Singh, S., Sticht, C., Breitkopf-Heinlein, K., Richter,  
1402 K., Karppinen, S.M., Pihlajaniemi, T., Arnold, B., Rodewald, H.R., Augustin, H.G.,  
1403 Schledzewski, K., Goerdt, S., 2017. GATA4-dependent organ-specific endothelial  
1404 differentiation controls liver development and embryonic hematopoiesis. *J Clin Invest*  
1405 127, 1099-1114.
- 1406 Giet, R., Prigent, C., 1999. Aurora/lpl1p-related kinases, a new oncogenic family of  
1407 mitotic serine-threonine kinases. *J Cell Sci* 112 ( Pt 21), 3591-3601.
- 1408 Goldeman, C., Ozgur, B., Brodin, B., 2020. Culture-induced changes in mRNA  
1409 expression levels of efflux and SLC-transporters in brain endothelial cells. *Fluids*  
1410 *Barriers CNS* 17, 32.
- 1411 Goodwin, J.E., Zhang, X., Rotllan, N., Feng, Y., Zhou, H., Fernandez-Hernando, C., Yu,  
1412 J., Sessa, W.C., 2015. Endothelial glucocorticoid receptor suppresses atherogenesis--  
1413 brief report. *Arterioscler Thromb Vasc Biol* 35, 779-782.
- 1414 Graef, I.A., Chen, F., Chen, L., Kuo, A., Crabtree, G.R., 2001. Signals Transduced by  
1415 Ca<sup>2+</sup>/Calcineurin and NFATc3/c4 Pattern the Developing Vasculature. *Cell* 105, 863-  
1416 875.
- 1417 Guo, L., Zhang, H., Hou, Y., Wei, T., Liu, J., 2016. Plasmalemma vesicle-associated  
1418 protein: A crucial component of vascular homeostasis. *Exp Ther Med* 12, 1639-1644.
- 1419 Hafemeister, C., Satija, R., 2019. Normalization and variance stabilization of single-cell  
1420 RNA-seq data using regularized negative binomial regression. *Genome Biol* 20, 296.
- 1421 Hao, Y., Hao, S., Andersen-Nissen, E., Mauck, W.M., 3rd, Zheng, S., Butler, A., Lee,  
1422 M.J., Wilk, A.J., Darby, C., Zager, M., Hoffman, P., Stoeckius, M., Papalexi, E., Mimitou,  
1423 E.P., Jain, J., Srivastava, A., Stuart, T., Fleming, L.M., Yeung, B., Rogers, A.J.,  
1424 McElrath, J.M., Blish, C.A., Gottardo, R., Smibert, P., Satija, R., 2021. Integrated  
1425 analysis of multimodal single-cell data. *Cell* 184, 3573-3587 e3529.
- 1426 Harris, E.S., Nelson, W.J., 2010. VE-cadherin: at the front, center, and sides of  
1427 endothelial cell organization and function. *Curr Opin Cell Biol* 22, 651-658.
- 1428 Heinz, S., Benner, C., Spann, N., Bertolino, E., Lin, Y.C., Laslo, P., Cheng, J.X., Murre,  
1429 C., Singh, H., Glass, C.K., 2010. Simple combinations of lineage-determining  
1430 transcription factors prime cis-regulatory elements required for macrophage and B cell  
1431 identities. *Mol Cell* 38, 576-589.

- 1432 Hu, C.K., Coughlin, M., Field, C.M., Mitchison, T.J., 2011. KIF4 regulates midzone  
1433 length during cytokinesis. *Curr Biol* 21, 815-824.
- 1434 Hupe, M., Li, M.X., Kneitz, S., Davydova, D., Yokota, C., Kele, J., Hot, B., Stenman,  
1435 J.M., Gessler, M., 2017. Gene expression profiles of brain endothelial cells during  
1436 embryonic development at bulk and single-cell levels. *Sci Signal* 10.
- 1437 Hwa, C., Aird, W.C., 2007. The history of the capillary wall: doctors, discoveries, and  
1438 debates. *Am J Physiol Heart Circ Physiol* 293, H2667-2679.
- 1439 Institute, B., 2019. Picard Toolkit. Broad Institute, GitHub repository.
- 1440 Jambusaria, A., Hong, Z., Zhang, L., Srivastava, S., Jana, A., Toth, P.T., Dai, Y., Malik,  
1441 A.B., Rehman, J., 2020. Endothelial heterogeneity across distinct vascular beds during  
1442 homeostasis and inflammation. *Elife* 9.
- 1443 Jeong, H.W., Hernandez-Rodriguez, B., Kim, J., Kim, K.P., Enriquez-Gasca, R., Yoon,  
1444 J., Adams, S., Scholer, H.R., Vaquerizas, J.M., Adams, R.H., 2017. Transcriptional  
1445 regulation of endothelial cell behavior during sprouting angiogenesis. *Nat Commun* 8,  
1446 726.
- 1447 Jho, E.H., Zhang, T., Domon, C., Joo, C.K., Freund, J.N., Costantini, F., 2002.  
1448 Wnt/beta-catenin/Tcf signaling induces the transcription of Axin2, a negative regulator of  
1449 the signaling pathway. *Mol Cell Biol* 22, 1172-1183.
- 1450 Jonkers, I., Lis, J.T., 2015. Getting up to speed with transcription elongation by RNA  
1451 polymerase II. *Nat Rev Mol Cell Biol* 16, 167-177.
- 1452 Kalucka, J., de Rooij, L., Goveia, J., Rohlenova, K., Dumas, S.J., Meta, E., Conchinha,  
1453 N.V., Taverna, F., Teuwen, L.A., Veys, K., Garcia-Caballero, M., Khan, S., Geldhof, V.,  
1454 Sokol, L., Chen, R., Treppe, L., Borri, M., de Zeeuw, P., Dubois, C., Karakach, T.K.,  
1455 Falkenberg, K.D., Parys, M., Yin, X., Vinckier, S., Du, Y., Fenton, R.A., Schoonjans, L.,  
1456 Dewerchin, M., Eelen, G., Thienpont, B., Lin, L., Bolund, L., Li, X., Luo, Y., Carmeliet,  
1457 P., 2020. Single-Cell Transcriptome Atlas of Murine Endothelial Cells. *Cell* 180, 764-779  
1458 e720.
- 1459 Kanai, Y., Hirokawa, N., 1995. Sorting Mechanisms of Tau and MAP2 in Neurons:  
1460 Suppressed Axonal Transit of MAP2 and Locally Regulate Microtubule Binding. *Neuron*  
1461 14, 421-432.
- 1462 Keisuke, Y., Eric, E., Colin, N., Bongnam, J., Konstantin, G., Kristina, H., Steven, L.S.,  
1463 Catherine, H.L., Michel, V.L., Andrew, K., Zhongjie, F., Lois, E.H.S., Christer, B.,  
1464 Timothy, H., 2020. sphingosine 1 phosphate receptor signaling establishes ap 1  
1465 gradients to allow for retinal endothelial cell specialization. *Developmental Cell*.

- 1466 Kimball, S.R., Horetsky, R.L., Jefferson, L.S., 1995. Hormonal regulation of albumin  
1467 gene expression in primary cultures of rat hepatocytes. *Am J Physiol* 268, E6-14.
- 1468 Kondrychyn, I., Kelly, D.J., Carretero, N.T., Nomori, A., Kato, K., Chong, J., Nakajima,  
1469 H., Okuda, S., Mochizuki, N., Phng, L.K., 2020. Marcksl1 modulates endothelial cell  
1470 mechanoresponse to haemodynamic forces to control blood vessel shape and size. *Nat*  
1471 *Commun* 11, 5476.
- 1472 Lacorre, D.A., Baekkevold, E.S., Garrido, I., Brandtzaeg, P., Haraldsen, G., Amalric, F.,  
1473 Girard, J.P., 2004. Plasticity of endothelial cells: rapid dedifferentiation of freshly  
1474 isolated high endothelial venule endothelial cells outside the lymphoid tissue  
1475 microenvironment. *Blood* 103, 4164-4172.
- 1476 Lam, T.I., Wise, P.M., O'Donnell, M.E., 2009. Cerebral microvascular endothelial cell  
1477 Na/H exchange: evidence for the presence of NHE1 and NHE2 isoforms and regulation  
1478 by arginine vasopressin. *Am J Physiol Cell Physiol* 297, C278-289.
- 1479 Langmead, B., Salzberg, S.L., 2012. Fast gapped-read alignment with Bowtie 2. *Nat*  
1480 *Methods* 9, 357-359.
- 1481 Lee, S.H., Lee, S., Yang, H., Song, S., Kim, K., Saunders, T.L., Yoon, J.K., Koh, G.Y.,  
1482 Kim, I., 2014. Notch pathway targets proangiogenic regulator Sox17 to restrict  
1483 angiogenesis. *Circ Res* 115, 215-226.
- 1484 Leikauf, G.D., Pope-Varsalona, H., Concel, V.J., Liu, P., Bein, K., Berndt, A., Martin,  
1485 T.M., Ganguly, K., Jang, A.S., Brant, K.A., Dopico, R.A., Jr., Upadhyay, S., Di, Y.P., Li,  
1486 Q., Hu, Z., Vuga, L.J., Medvedovic, M., Kaminski, N., You, M., Alexander, D.C.,  
1487 McDunn, J.E., Prows, D.R., Knoell, D.L., Fabisiak, J.P., 2012. Integrative assessment of  
1488 chlorine-induced acute lung injury in mice. *Am J Respir Cell Mol Biol* 47, 234-244.
- 1489 Lepore, J.J., Mericko, P.A., Cheng, L., Lu, M.M., Morrissey, E.E., Parmacek, M.S., 2006.  
1490 GATA-6 regulates semaphorin 3C and is required in cardiac neural crest for  
1491 cardiovascular morphogenesis. *J Clin Invest* 116, 929-939.
- 1492 Licht, A.H., Pein, O.T., Florin, L., Hartenstein, B., Reuter, H., Arnold, B., Lichter, P.,  
1493 Angel, P., Schorpp-Kistner, M., 2006. JunB is required for endothelial cell  
1494 morphogenesis by regulating core-binding factor beta. *J Cell Biol* 175, 981-991.
- 1495 Liebner, S., Corada, M., Bangsow, T., Babbage, J., Taddei, A., Czupalla, C.J., Reis, M.,  
1496 Felici, A., Wolburg, H., Fruttiger, M., Taketo, M.M., von Melchner, H., Plate, K.H.,  
1497 Gerhardt, H., Dejana, E., 2008. Wnt/beta-catenin signaling controls development of the  
1498 blood-brain barrier. *J Cell Biol* 183, 409-417.
- 1499 Lim, K.C., Hosoya, T., Brandt, W., Ku, C.J., Hosoya-Ohmura, S., Camper, S.A.,  
1500 Yamamoto, M., Engel, J.D., 2012. Conditional Gata2 inactivation results in HSC loss  
1501 and lymphatic mispatterning. *J Clin Invest* 122, 3705-3717.

- 1502 Lin, Y.-T., Chao, C.C.K., 2015. Identification of the  $\beta$ -catenin/JNK/prothymosin-alpha  
1503 axis as a novel target of sorafenib in hepatocellular carcinoma cells. *Oncotarget* 6,  
1504 38999-39017.
- 1505 Liu, B., Zhou, H., Zhang, T., Gao, X., Tao, B., Xing, H., Zhuang, Z., Dardik, A.,  
1506 Kyriakides, T.R., Goodwin, J.E., 2021. Loss of endothelial glucocorticoid receptor  
1507 promotes angiogenesis via upregulation of Wnt/beta-catenin pathway. *Angiogenesis* 24,  
1508 631-645.
- 1509 Liu, C., Wang, M., Wei, X., Wu, L., Xu, J., Dai, X., Xia, J., Cheng, M., Yuan, Y., Zhang,  
1510 P., Li, J., Feng, T., Chen, A., Zhang, W., Chen, F., Shang, Z., Zhang, X., Peters, B.A.,  
1511 Liu, L., 2019. An ATAC-seq atlas of chromatin accessibility in mouse tissues. *Sci Data*  
1512 6, 65.
- 1513 Lizama, C.O., Hawkins, J.S., Schmitt, C.E., Bos, F.L., Zape, J.P., Cautivo, K.M., Borges  
1514 Pinto, H., Rhyner, A.M., Yu, H., Donohoe, M.E., Wythe, J.D., Zovein, A.C., 2015.  
1515 Repression of arterial genes in hemogenic endothelium is sufficient for haematopoietic  
1516 fate acquisition. *Nat Commun* 6, 7739.
- 1517 Loots, G.G., Ovcharenko, I., 2004. rVISTA 2.0: evolutionary analysis of transcription  
1518 factor binding sites. *Nucleic Acids Res* 32, W217-221.
- 1519 Lopez-Molina, L., Conquet, F., Dubois-Dauphin, M., Schibler, U., 1997. The DBP gene  
1520 is expressed according to a circadian rhythm in the suprachiasmatic nucleus and  
1521 influences circadian behavior. *EMBO J* 16, 6762-6771.
- 1522 Love, M.I., Huber, W., Anders, S., 2014. Moderated estimation of fold change and  
1523 dispersion for RNA-seq data with DESeq2. *Genome Biol* 15, 550.
- 1524 Marcu, R., Choi, Y.J., Xue, J., Fortin, C.L., Wang, Y., Nagao, R.J., Xu, J., MacDonald,  
1525 J.W., Bammler, T.K., Murry, C.E., Muczynski, K., Stevens, K.R., Himmelfarb, J.,  
1526 Schwartz, S.M., Zheng, Y., 2018. Human Organ-Specific Endothelial Cell  
1527 Heterogeneity. *iScience* 4, 20-35.
- 1528 Matus, A., Bernhardt, R., Hugh-Jones, T., 1981. High molecular weight microtubule-  
1529 associated proteins are preferentially associated with dendritic microtubules in brain.  
1530 *Proc Natl Acad Sci U S A* 78, 3010-3014.
- 1531 McGinnis, C.S., Murrow, L.M., Gartner, Z.J., 2019. DoubletFinder: Doublet Detection in  
1532 Single-Cell RNA Sequencing Data Using Artificial Nearest Neighbors. *Cell Syst* 8, 329-  
1533 337 e324.
- 1534 McLean, C.Y., Bristor, D., Hiller, M., Clarke, S.L., Schaar, B.T., Lowe, C.B., Wenger,  
1535 A.M., Bejerano, G., 2010. GREAT improves functional interpretation of cis-regulatory  
1536 regions. *Nat Biotechnol* 28, 495-501.

- 1537 Melville, L.M.a.J.H.a.J., 2020. UMAP: Uniform Manifold Approximation and Projection  
1538 for Dimension Reduction. arXiv.
- 1539 Menzel, S., Moeller, M.J., 2011. Role of the podocyte in proteinuria. *Pediatr Nephrol* 26,  
1540 1775-1780.
- 1541 Mike, H., Minerva Xueting, L., Susanne, K., Daria, D., Chika, Y., Julianna, K., Belma, H.,  
1542 Jan, M.S., Manfred, G., 2017. gene expression profiles of brain endothelial cells during  
1543 embryonic development at bulk and single cell levels. *Science Signaling*.
- 1544 Mo, A., Mukamel, Eran A., Davis, Fred P., Luo, C., Henry, Gilbert L., Picard, S., Urich,  
1545 Mark A., Nery, Joseph R., Sejnowski, Terrence J., Lister, R., Eddy, Sean R., Ecker,  
1546 Joseph R., Nathans, J., 2015. Epigenomic Signatures of Neuronal Diversity in the  
1547 Mammalian Brain. *Neuron* 86, 1369-1384.
- 1548 Mohamed, T., Sequeira-Lopez, M.L.S., 2019. Development of the renal vasculature.  
1549 *Semin Cell Dev Biol* 91, 132-146.
- 1550 Nadeau, M., Georges, R.O., Laforest, B., Yamak, A., Lefebvre, C., Beauregard, J.,  
1551 Paradis, P., Bruneau, B.G., Andelfinger, G., Nemer, M., 2010. An endocardial pathway  
1552 involving Tbx5, Gata4, and Nos3 required for atrial septum formation. *Proc Natl Acad*  
1553 *Sci U S A* 107, 19356-19361.
- 1554 Nalecz, K.A., 2017. Solute Carriers in the Blood-Brain Barrier: Safety in Abundance.  
1555 *Neurochem Res* 42, 795-809.
- 1556 Narita, T., Ito, S., Higashijima, Y., Chu, W.K., Neumann, K., Walter, J., Satpathy, S.,  
1557 Liebner, T., Hamilton, W.B., Maskey, E., Prus, G., Shibata, M., Iesmantavicius, V.,  
1558 Brickman, J.M., Anastassiadis, K., Koseki, H., Choudhary, C., 2021. Enhancers are  
1559 activated by p300/CBP activity-dependent PIC assembly, RNAPII recruitment, and  
1560 pause release. *Mol Cell* 81, 2166-2182 e2166.
- 1561 Nayak, G., Odaka, Y., Prasad, V., Solano, A.F., Yeo, E.J., Vemaraju, S., Molkentin,  
1562 J.D., Trumpp, A., Williams, B., Rao, S., Lang, R.A., 2018. Developmental vascular  
1563 regression is regulated by a Wnt/beta-catenin, MYC and CDKN1A pathway that controls  
1564 cell proliferation and cell death. *Development* 145.
- 1565 Newman, P.J., 1994. The Role of PECAM-1 in Vascular Cell Biology. *Annals of the*  
1566 *New York Academy of Sciences* 714, 165-174.
- 1567 Nguyen, L.N., Ma, D., Shui, G., Wong, P., Cazenave-Gassiot, A., Zhang, X., Wenk,  
1568 M.R., Goh, E.L., Silver, D.L., 2014. Mfsd2a is a transporter for the essential omega-3  
1569 fatty acid docosahexaenoic acid. *Nature* 509, 503-506.

- 1570 Nitta, T., Hata, M., Gotoh, S., Seo, Y., Sasaki, H., Hashimoto, N., Furuse, M., Tsukita,  
1571 S., 2003. Size-selective loosening of the blood-brain barrier in claudin-5-deficient mice.  
1572 *J Cell Biol* 161, 653-660.
- 1573 Nolan, D.J., Ginsberg, M., Israely, E., Palikuqi, B., Poulos, M.G., James, D., Ding, B.S.,  
1574 Schachterle, W., Liu, Y., Rosenwaks, Z., Butler, J.M., Xiang, J., Rafii, A., Shido, K.,  
1575 Rabbany, S.Y., Elemento, O., Rafii, S., 2013. Molecular signatures of tissue-specific  
1576 microvascular endothelial cell heterogeneity in organ maintenance and regeneration.  
1577 *Dev Cell* 26, 204-219.
- 1578 Nureki, S.I., Tomer, Y., Venosa, A., Katzen, J., Russo, S.J., Jamil, S., Barrett, M.,  
1579 Nguyen, V., Kopp, M., Mulugeta, S., Beers, M.F., 2018. Expression of mutant Sftpc in  
1580 murine alveolar epithelia drives spontaneous lung fibrosis. *J Clin Invest* 128, 4008-4024.
- 1581 O'Brown, N.M., Megason, S.G., Gu, C., 2019. Suppression of transcytosis regulates  
1582 zebrafish blood-brain barrier function. *Elife* 8.
- 1583 Obermeier, B., Daneman, R., Ransohoff, R.M., 2013. Development, maintenance and  
1584 disruption of the blood-brain barrier. *Nat Med* 19, 1584-1596.
- 1585 Ortiz, A., Lee, Y.C., Yu, G., Liu, H.C., Lin, S.C., Bilen, M.A., Cho, H., Yu-Lee, L.Y., Lin,  
1586 S.H., 2015. Angiomotin is a novel component of cadherin-11/beta-catenin/p120 complex  
1587 and is critical for cadherin-11-mediated cell migration. *FASEB J* 29, 1080-1091.
- 1588 Ose, A., Kusuhara, H., Endo, C., Tohyama, K., Miyajima, M., Kitamura, S., Sugiyama,  
1589 Y., 2010. Functional Characterization of Mouse Organic Anion Transporting Peptide 1a4  
1590 in the Uptake and Efflux of Drugs Across the Blood-Brain Barrier. *Drug Metabolism and*  
1591 *Disposition* 38, 168-176.
- 1592 Ovcharenko, I., Nobrega, M.A., Loots, G.G., Stubbs, L., 2004. ECR Browser: a tool for  
1593 visualizing and accessing data from comparisons of multiple vertebrate genomes.  
1594 *Nucleic Acids Res* 32, W280-286.
- 1595 Paik, D.T., Tian, L., Williams, I.M., Rhee, S., Zhang, H., Liu, C., Mishra, R., Wu, S.M.,  
1596 Red-Horse, K., Wu, J.C., 2020. Single-Cell RNA Sequencing Unveils Unique  
1597 Transcriptomic Signatures of Organ-Specific Endothelial Cells. *Circulation* 142, 1848-  
1598 1862.
- 1599 Paik, J.H., Kollipara, R., Chu, G., Ji, H., Xiao, Y., Ding, Z., Miao, L., Tothova, Z., Horner,  
1600 J.W., Carrasco, D.R., Jiang, S., Gilliland, D.G., Chin, L., Wong, W.H., Castrillon, D.H.,  
1601 DePinho, R.A., 2007. FoxOs are lineage-restricted redundant tumor suppressors and  
1602 regulate endothelial cell homeostasis. *Cell* 128, 309-323.
- 1603 Palikuqi, B., Nguyen, D.T., Li, G., Schreiner, R., Pellegata, A.F., Liu, Y., Redmond, D.,  
1604 Geng, F., Lin, Y., Gomez-Salinerro, J.M., Yokoyama, M., Zumbo, P., Zhang, T., Kunar,  
1605 B., Witherspoon, M., Han, T., Tedeschi, A.M., Scottoni, F., Lipkin, S.M., Dow, L.,



- 1606 Elemento, O., Xiang, J.Z., Shido, K., Spence, J.R., Zhou, Q.J., Schwartz, R.E., De  
1607 Coppi, P., Rabbany, S.Y., Rafii, S., 2020. Adaptable haemodynamic endothelial cells for  
1608 organogenesis and tumorigenesis. *Nature* 585, 426-432.
- 1609 Palomero, J., Vegliante, M.C., Rodriguez, M.L., Eguileor, A., Castellano, G., Planas-  
1610 Rigol, E., Jares, P., Ribera-Cortada, I., Cid, M.C., Campo, E., Amador, V., 2014. SOX11  
1611 promotes tumor angiogenesis through transcriptional regulation of PDGFA in mantle cell  
1612 lymphoma. *Blood* 124, 2235-2247.
- 1613 Patro, R., Duggal, G., Love, M.I., Irizarry, R.A., Kingsford, C., 2017. Salmon provides  
1614 fast and bias-aware quantification of transcript expression. *Nat Methods* 14, 417-419.
- 1615 Pellowe, A.S., Sauler, M., Hou, Y., Merola, J., Liu, R., Calderon, B., Lauridsen, H.M.,  
1616 Harris, M.R., Leng, L., Zhang, Y., Tilstam, P.V., Pober, J.S., Bucala, R., Lee, P.J.,  
1617 Gonzalez, A.L., 2019. Endothelial cell-secreted MIF reduces pericyte contractility and  
1618 enhances neutrophil extravasation. *FASEB J* 33, 2171-2186.
- 1619 Pimanda, J.E., Chan, W.Y., Donaldson, I.J., Bowen, M., Green, A.R., Gottgens, B.,  
1620 2006. Endoglin expression in the endothelium is regulated by Fli-1, Erg, and Elf-1 acting  
1621 on the promoter and a -8-kb enhancer. *Blood* 107, 4737-4745.
- 1622 Potente, M., Urbich, C., Sasaki, K., Hofmann, W.K., Heeschen, C., Aicher, A., Kollipara,  
1623 R., DePinho, R.A., Zeiher, A.M., Dimmeler, S., 2005. Involvement of Foxo transcription  
1624 factors in angiogenesis and postnatal neovascularization. *J Clin Invest* 115, 2382-2392.
- 1625 Pulido, R.S., Munji, R.N., Chan, T.C., Quirk, C.R., Weiner, G.A., Weger, B.D., Rossi,  
1626 M.J., Elmsaouri, S., Malfavon, M., Deng, A., Profaci, C.P., Blanchette, M., Qian, T.,  
1627 Foreman, K.L., Shusta, E.V., Gorman, M.R., Gachon, F., Leutgeb, S., Daneman, R.,  
1628 2020. Neuronal Activity Regulates Blood-Brain Barrier Efflux Transport through  
1629 Endothelial Circadian Genes. *Neuron* 108, 937-952 e937.
- 1630 Qin, G., Kishore, R., Dolan, C.M., Silver, M., Wecker, A., Luedemann, C.N., Thorne, T.,  
1631 Hanley, A., Curry, C., Heyd, L., Dinesh, D., Kearney, M., Martelli, F., Murayama, T.,  
1632 Goukassian, D.A., Zhu, Y., Losordo, D.W., 2006. Cell cycle regulator E2F1 modulates  
1633 angiogenesis via p53-dependent transcriptional control of VEGF. *Proc Natl Acad Sci U*  
1634 *S A* 103, 11015-11020.
- 1635 Qiu, X., Hill, A., Packer, J., Lin, D., Ma, Y.A., Trapnell, C., 2017a. Single-cell mRNA  
1636 quantification and differential analysis with Census. *Nat Methods* 14, 309-315.
- 1637 Qiu, X., Mao, Q., Tang, Y., Wang, L., Chawla, R., Pliner, H.A., Trapnell, C., 2017b.  
1638 Reversed graph embedding resolves complex single-cell trajectories. *Nat Methods* 14,  
1639 979-982.



- 1640 Ranger, A.M., Grusby, M.J., Hodge, M.R., Gravallese, E.M., de la Brousse, F.C., Hoey,  
1641 T., Mickanin, C., Baldwin, H.S., Glimcher, L.H., 1998. The transcription factor NF-ATc is  
1642 essential for cardiac valve formation. *Nature* 392, 186-190.
- 1643 Redman, C.M., 1969. Biosynthesis of Serum Proteins and Ferritin by Free and Attached  
1644 Ribosomes of Rat Liver. *Journal of Biological Chemistry* 244, 4308-4315.
- 1645 Rivera-Feliciano, J., Lee, K.H., Kong, S.W., Rajagopal, S., Ma, Q., Springer, Z., Izumo,  
1646 S., Tabin, C.J., Pu, W.T., 2006. Development of heart valves requires Gata4 expression  
1647 in endothelial-derived cells. *Development* 133, 3607-3618.
- 1648 Roder, K., Werdich, A.A., Li, W., Liu, M., Kim, T.Y., Organ-Darling, L.E., Moshal, K.S.,  
1649 Hwang, J.M., Lu, Y., Choi, B.R., MacRae, C.A., Koren, G., 2014. RING finger protein  
1650 RNF207, a novel regulator of cardiac excitation. *J Biol Chem* 289, 33730-33740.
- 1651 Ross-Innes, C.S., Stark, R., Teschendorff, A.E., Holmes, K.A., Ali, H.R., Dunning, M.J.,  
1652 Brown, G.D., Gojts, O., Ellis, I.O., Green, A.R., Ali, S., Chin, S.F., Palmieri, C., Caldas,  
1653 C., Carroll, J.S., 2012. Differential oestrogen receptor binding is associated with clinical  
1654 outcome in breast cancer. *Nature* 481, 389-393.
- 1655 Roudnicky, F., Kim, B.K., Lan, Y., Schmucki, R., Koppers, V., Christensen, K., Graf, M.,  
1656 Patsch, C., Burcin, M., Meyer, C.A., Westenskow, P.D., Cowan, C.A., 2020.  
1657 Identification of a combination of transcription factors that synergistically increases  
1658 endothelial cell barrier resistance. *Sci Rep* 10, 3886.
- 1659 Rudnicki, M., Abdifarkosh, G., Nwadozi, E., Ramos, S.V., Makki, A., Sepa-Kishi, D.M.,  
1660 Ceddia, R.B., Perry, C.G., Roudier, E., Haas, T.L., 2018. Endothelial-specific FoxO1  
1661 depletion prevents obesity-related disorders by increasing vascular metabolism and  
1662 growth. *Elife* 7.
- 1663 Sabbagh, M.F., Heng, J.S., Luo, C., Castanon, R.G., Nery, J.R., Rattner, A., Goff, L.A.,  
1664 Ecker, J.R., Nathans, J., 2018. Transcriptional and epigenomic landscapes of CNS and  
1665 non-CNS vascular endothelial cells. *Elife* 7.
- 1666 Schaeffer, S., Iadecola, C., 2021. Revisiting the neurovascular unit. *Nat Neurosci* 24,  
1667 1198-1209.
- 1668 Schilham, M.W., Oosterwegel, M.A., Moerer, P., Ya, J., de Boer, P.A., van de Wetering,  
1669 M., Verbeek, S., Lamers, W.H., Kruisbeek, A.M., Cumano, A., Clevers, H., 1996.  
1670 Defects in cardiac outflow tract formation and pro-B-lymphocyte expansion in mice  
1671 lacking Sox-4. *Nature* 380, 711-714.
- 1672 Schmitt, C.E., Woolls, M.J., Jin, S.W., 2013. Mutant-specific gene expression profiling  
1673 identifies SRY-related HMG box 11b (SOX11b) as a novel regulator of vascular  
1674 development in zebrafish. *Mol Cells* 35, 166-172.

- 1675 Shannon, P., Markiel, A., Ozier, O., Baliga, N.S., Wang, J.T., Ramage, D., Amin, N.,  
1676 Schwikowski, B., Ideker, T., 2003. Cytoscape: a software environment for integrated  
1677 models of biomolecular interaction networks. *Genome Res* 13, 2498-2504.
- 1678 Shtutman, M., Zhurinsky, J., Simcha, I., Albanese, C., D'Amico, M., Pestell, R., Ben-  
1679 Ze'ev, A., 1999. The cyclin D1 gene is a target of the beta-catenin/LEF-1 pathway. *Proc*  
1680 *Natl Acad Sci U S A* 96, 5522-5527.
- 1681 Soh, B.S., Buac, K., Xu, H., Li, E., Ng, S.Y., Wu, H., Chmielowiec, J., Jiang, X., Bu, L.,  
1682 Li, R.A., Cowan, C., Chien, K.R., 2014. N-cadherin prevents the premature  
1683 differentiation of anterior heart field progenitors in the pharyngeal mesodermal  
1684 microenvironment. *Cell Res* 24, 1420-1432.
- 1685 Sonesson, C., Love, M.I., Robinson, M.D., 2015. Differential analyses for RNA-seq:  
1686 transcript-level estimates improve gene-level inferences. *F1000Res* 4, 1521.
- 1687 Sorensen, I., Adams, R.H., Gossler, A., 2009. DLL1-mediated Notch activation  
1688 regulates endothelial identity in mouse fetal arteries. *Blood* 113, 5680-5688.
- 1689 Stark R, B.G., 2011. DiffBind: differential binding analysis of ChIP-Seq peak data.
- 1690 Starks, R.R., Abu Alhasan, R., Kaur, H., Pennington, K.A., Schulz, L.C., Tuteja, G.,  
1691 2020. Transcription Factor PLAGL1 Is Associated with Angiogenic Gene Expression in  
1692 the Placenta. *Int J Mol Sci* 21.
- 1693 Stenman, J.M., Rajagopal, J., Carroll, T.J., Ishibashi, M., McMahon, J., McMahon, A.P.,  
1694 2008. Canonical Wnt signaling regulates organ-specific assembly and differentiation of  
1695 CNS vasculature. *Science* 322, 1247-1250.
- 1696 Sugiaman-Trapman, D., Vitezic, M., Jouhilahti, E.M., Mathelier, A., Lauter, G., Misra, S.,  
1697 Daub, C.O., Kere, J., Swoboda, P., 2018. Characterization of the human RFX  
1698 transcription factor family by regulatory and target gene analysis. *BMC Genomics* 19,  
1699 181.
- 1700 Tarlungeanu, D.C., Deliu, E., Dotter, C.P., Kara, M., Janiesch, P.C., Scalise, M.,  
1701 Galluccio, M., Tesulov, M., Morelli, E., Sonmez, F.M., Bilguvar, K., Ohgaki, R., Kanai,  
1702 Y., Johansen, A., Esharif, S., Ben-Omran, T., Topcu, M., Schlessinger, A., Indiveri, C.,  
1703 Duncan, K.E., Caglayan, A.O., Gunel, M., Gleeson, J.G., Novarino, G., 2016. Impaired  
1704 Amino Acid Transport at the Blood Brain Barrier Is a Cause of Autism Spectrum  
1705 Disorder. *Cell* 167, 1481-1494 e1418.
- 1706 Team, R.C., 4.1. R: A Language and Environment for Statistical Computing. R  
1707 Foundation for Statistical Computing.
- 1708 Tetsu, O., McCormick, F., 1999. Beta-catenin regulates expression of cyclin D1 in colon  
1709 carcinoma cells. *Nature* 398, 422-426.

- 1710 Thurman, R.E., Rynes, E., Humbert, R., Vierstra, J., Maurano, M.T., Haugen, E.,  
1711 Sheffield, N.C., Stergachis, A.B., Wang, H., Vernet, B., Garg, K., John, S., Sandstrom,  
1712 R., Bates, D., Boatman, L., Canfield, T.K., Diegel, M., Dunn, D., Ebersol, A.K., Frum, T.,  
1713 Giste, E., Johnson, A.K., Johnson, E.M., Kutayavin, T., Lajoie, B., Lee, B.K., Lee, K.,  
1714 London, D., Lotakis, D., Neph, S., Neri, F., Nguyen, E.D., Qu, H., Reynolds, A.P.,  
1715 Roach, V., Safi, A., Sanchez, M.E., Sanyal, A., Shafer, A., Simon, J.M., Song, L., Vong,  
1716 S., Weaver, M., Yan, Y., Zhang, Z., Zhang, Z., Lenhard, B., Tewari, M., Dorschner,  
1717 M.O., Hansen, R.S., Navas, P.A., Stamatoyannopoulos, G., Iyer, V.R., Lieb, J.D.,  
1718 Sunyaev, S.R., Akey, J.M., Sabo, P.J., Kaul, R., Furey, T.S., Dekker, J., Crawford, G.E.,  
1719 Stamatoyannopoulos, J.A., 2012. The accessible chromatin landscape of the human  
1720 genome. *Nature* 489, 75-82.
- 1721 Toole, J.J., Hastie, N.D., Held, W.A., 1979. An abundant androgen-regulated mRNA in  
1722 the mouse kidney. *Cell* 17, 441-448.
- 1723 Trapnell, C., Cacchiarelli, D., Grimsby, J., Pokharel, P., Li, S., Morse, M., Lennon, N.J.,  
1724 Livak, K.J., Mikkelsen, T.S., Rinn, J.L., 2014. The dynamics and regulators of cell fate  
1725 decisions are revealed by pseudotemporal ordering of single cells. *Nat Biotechnol* 32,  
1726 381-386.
- 1727 Ustiyani, V., Bolte, C., Zhang, Y., Han, L., Xu, Y., Yutzey, K.E., Zorn, A.M., Kalin, T.V.,  
1728 Shannon, J.M., Kalinichenko, V.V., 2018. FOXF1 transcription factor promotes lung  
1729 morphogenesis by inducing cellular proliferation in fetal lung mesenchyme. *Dev Biol*  
1730 443, 50-63.
- 1731 Vanlandewijck, M., He, L., Mae, M.A., Andrae, J., Ando, K., Del Gaudio, F., Nahar, K.,  
1732 Lebouvier, T., Lavina, B., Gouveia, L., Sun, Y., Raschperger, E., Rasanen, M., Zarb, Y.,  
1733 Mochizuki, N., Keller, A., Lendahl, U., Betsholtz, C., 2018. A molecular atlas of cell  
1734 types and zonation in the brain vasculature. *Nature* 554, 475-480.
- 1735 Varin, E.M., Mulvihill, E.E., Beaudry, J.L., Pujadas, G., Fuchs, S., Tanti, J.F., Fazio, S.,  
1736 Kaur, K., Cao, X., Baggio, L.L., Matthews, D., Campbell, J.E., Drucker, D.J., 2019.  
1737 Circulating Levels of Soluble Dipeptidyl Peptidase-4 Are Dissociated from Inflammation  
1738 and Induced by Enzymatic DPP4 Inhibition. *Cell Metab* 29, 320-334 e325.
- 1739 Vattulainen-Collanus, S., Southwood, M., Yang, X.D., Moore, S., Ghatpande, P.,  
1740 Morrell, N.W., Lagna, G., Hata, A., 2018. Bone morphogenetic protein signaling is  
1741 required for RAD51-mediated maintenance of genome integrity in vascular endothelial  
1742 cells. *Commun Biol* 1, 149.
- 1743 Veys, K., Fan, Z., Ghobrial, M., Bouche, A., Garcia-Caballero, M., Vriens, K.,  
1744 Conchinha, N.V., Seuwen, A., Schlegel, F., Gorski, T., Crabbe, M., Gilardoni, P.,  
1745 Ardicoglu, R., Schaffnerath, J., Casteels, C., De Smet, G., Smolders, I., Van Laere, K.,  
1746 Abel, E.D., Fendt, S.M., Schroeter, A., Kalucka, J., Cantelmo, A.R., Walchli, T., Keller,  
1747 A., Carmeliet, P., De Bock, K., 2020. Role of the GLUT1 Glucose Transporter in  
1748 Postnatal CNS Angiogenesis and Blood-Brain Barrier Integrity. *Circ Res* 127, 466-482.

- 1749 Vijayaraj, P., Le Bras, A., Mitchell, N., Kondo, M., Juliao, S., Wasserman, M., Beeler, D.,  
1750 Spokes, K., Aird, W.C., Baldwin, H.S., Oettgen, P., 2012. Erg is a crucial regulator of  
1751 endocardial-mesenchymal transformation during cardiac valve morphogenesis.  
1752 *Development* 139, 3973-3985.
- 1753 Vila Ellis, L., Cain, M.P., Hutchison, V., Flodby, P., Crandall, E.D., Borok, Z., Zhou, B.,  
1754 Ostrin, E.J., Wythe, J.D., Chen, J., 2020. Epithelial Vegfa Specifies a Distinct  
1755 Endothelial Population in the Mouse Lung. *Dev Cell* 52, 617-630 e616.
- 1756 Visel, A., Blow, M.J., Li, Z., Zhang, T., Akiyama, J.A., Holt, A., Plajzer-Frick, I., Shoukry,  
1757 M., Wright, C., Chen, F., Afzal, V., Ren, B., Rubin, E.M., Pennacchio, L.A., 2009a.  
1758 ChIP-seq accurately predicts tissue-specific activity of enhancers. *Nature* 457, 854-858.
- 1759 Visel, A., Rubin, E.M., Pennacchio, L.A., 2009b. Genomic views of distant-acting  
1760 enhancers. *Nature* 461, 199-205.
- 1761 Wang, Q., Reiter, R.S., Huang, Q.Q., Jin, J.P., Lin, J.J., 2001. Comparative studies on  
1762 the expression patterns of three troponin T genes during mouse development. *Anat Rec*  
1763 263, 72-84.
- 1764 Wang, Y., Sabbagh, M.F., Gu, X., Rattner, A., Williams, J., Nathans, J., 2019. Beta-  
1765 catenin signaling regulates barrier-specific gene expression in circumventricular organ  
1766 and ocular vasculatures. *Elife* 8.
- 1767 Wang, Z., Liu, C.H., Huang, S., Fu, Z., Tomita, Y., Britton, W.R., Cho, S.S., Chen, C.T.,  
1768 Sun, Y., Ma, J.X., He, X., Chen, J., 2020. Wnt signaling activates MFSD2A to suppress  
1769 vascular endothelial transcytosis and maintain blood-retinal barrier. *Sci Adv* 6,  
1770 eaba7457.
- 1771 Wang, Z.Y., Jin, L., Tan, H., Irwin, D.M., 2013. Evolution of hepatic glucose metabolism:  
1772 liver-specific glucokinase deficiency explained by parallel loss of the gene for  
1773 glucokinase regulatory protein (GCKR). *PLoS One* 8, e60896.
- 1774 Weksler, B., Romero, I.A., Couraud, P.O., 2013. The hCMEC/D3 cell line as a model of  
1775 the human blood brain barrier. *Fluids Barriers CNS* 10, 16.
- 1776 Wilhelm, K., Happel, K., Eelen, G., Schoors, S., Oellerich, M.F., Lim, R., Zimmermann,  
1777 B., Aspalter, I.M., Franco, C.A., Boettger, T., Braun, T., Fruttiger, M., Rajewsky, K.,  
1778 Keller, C., Bruning, J.C., Gerhardt, H., Carmeliet, P., Potente, M., 2016. FOXO1 couples  
1779 metabolic activity and growth state in the vascular endothelium. *Nature* 529, 216-220.
- 1780 Williams, J.L., Holman, D.W., Klein, R.S., 2014. Chemokines in the balance:  
1781 maintenance of homeostasis and protection at CNS barriers. *Front Cell Neurosci* 8, 154.
- 1782 Wilson, M.R., Holladay, J., Sheridan, R., Hostetter, G., Berghuis, B., Graveel, C.,  
1783 Essenburg, C., Peck, A., Ho, T.H., Stanton, M., Chandler, R.L., 2020. Lgr5-positive

- 1784 endothelial progenitor cells occupy a tumor and injury prone niche in the kidney vasa  
1785 recta. *Stem Cell Res* 46, 101849.
- 1786 Wong, B.H., Silver, D.L., 2020. Mfsd2a: A Physiologically Important Lysolipid  
1787 Transporter in the Brain and Eye, in: Jiang, X.-C. (Ed.), *Lipid Transfer in Lipoprotein*  
1788 *Metabolism and Cardiovascular Disease*. Springer Singapore, Singapore, pp. 223-234.
- 1789 Wythe, J.D., Dang, L.T., Devine, W.P., Boudreau, E., Artap, S.T., He, D., Schachterle,  
1790 W., Stainier, D.Y., Oettgen, P., Black, B.L., Bruneau, B.G., Fish, J.E., 2013. ETS factors  
1791 regulate Vegf-dependent arterial specification. *Dev Cell* 26, 45-58.
- 1792 Xie, L., Wang, Y., Chen, Z., 2021. LncRNA Blnc1 mediates the permeability and  
1793 inflammatory response of cerebral hemorrhage by regulating the PPAR-  
1794 gamma/SIRT6/FoxO3 pathway. *Life Sci* 267, 118942.
- 1795 Ximerakis, M., Lipnick, S.L., Innes, B.T., Simmons, S.K., Adiconis, X., Dionne, D.,  
1796 Mayweather, B.A., Nguyen, L., Niziolek, Z., Ozek, C., Butty, V.L., Isserlin, R.,  
1797 Buchanan, S.M., Levine, S.S., Regev, A., Bader, G.D., Levin, J.Z., Rubin, L.L., 2019.  
1798 Single-cell transcriptomic profiling of the aging mouse brain. *Nat Neurosci* 22, 1696-  
1799 1708.
- 1800 Yan, J., Zhang, L., Sultana, N., Oh, J.G., Wu, B., Hajjar, R.J., Zhou, B., Cai, C.L., 2016.  
1801 A series of robust genetic indicators for definitive identification of cardiomyocytes. *J Mol*  
1802 *Cell Cardiol* 97, 278-285.
- 1803 Yang, Y., Cvekl, A., 2007. Large Maf Transcription Factors: Cousins of AP-1 Proteins  
1804 and Important Regulators of Cellular Differentiation. *Einstein J Biol Med* 23, 2-11.
- 1805 Yano, K., Gale, D., Massberg, S., Cheruvu, P.K., Monahan-Earley, R., Morgan, E.S.,  
1806 Haig, D., von Andrian, U.H., Dvorak, A.M., Aird, W.C., 2007. Phenotypic heterogeneity  
1807 is an evolutionarily conserved feature of the endothelium. *Blood* 109, 613-615.
- 1808 Yao, J., Wu, X., Zhang, D., Wang, L., Zhang, L., Reynolds, E.X., Hernandez, C.,  
1809 Bostrom, K.I., Yao, Y., 2019a. Elevated endothelial Sox2 causes lumen disruption and  
1810 cerebral arteriovenous malformations. *J Clin Invest* 129, 3121-3133.
- 1811 Yao, Y., Yao, J., Bostrom, K.I., 2019b. SOX Transcription Factors in Endothelial  
1812 Differentiation and Endothelial-Mesenchymal Transitions. *Front Cardiovasc Med* 6, 30.
- 1813 Yoshitomi, Y., Ikeda, T., Saito-Takatsuji, H., Yonekura, H., 2021. Emerging Role of AP-  
1814 1 Transcription Factor JunB in Angiogenesis and Vascular Development. *Int J Mol Sci*  
1815 22.
- 1816 Zaragoza, R., 2020. Transport of Amino Acids Across the Blood-Brain Barrier. *Front*  
1817 *Physiol* 11, 973.

- 1818 Zeini, M., Hang, C.T., Lehrer-Graiwer, J., Dao, T., Zhou, B., Chang, C.P., 2009. Spatial  
1819 and temporal regulation of coronary vessel formation by calcineurin-NFAT signaling.  
1820 *Development* 136, 3335-3345.
- 1821 Zhang, Y., Liu, T., Meyer, C.A., Eeckhoute, J., Johnson, D.S., Bernstein, B.E.,  
1822 Nusbaum, C., Myers, R.M., Brown, M., Li, W., Liu, X.S., 2008. Model-based analysis of  
1823 ChIP-Seq (MACS). *Genome Biol* 9, R137.
- 1824 Zhao, R., Watt, A.J., Li, J., Luebke-Wheeler, J., Morrissey, E.E., Duncan, S.A., 2005.  
1825 GATA6 is essential for embryonic development of the liver but dispensable for early  
1826 heart formation. *Mol Cell Biol* 25, 2622-2631.
- 1827 Zheng, Y., Zhang, Y., Barutello, G., Chiu, K., Arigoni, M., Giampietro, C., Cavallo, F.,  
1828 Holmgren, L., 2016. Angiomotin like-1 is a novel component of the N-cadherin complex  
1829 affecting endothelial/pericyte interaction in normal and tumor angiogenesis. *Sci Rep* 6,  
1830 30622.
- 1831 Zhou, P., Gu, F., Zhang, L., Akerberg, B.N., Ma, Q., Li, K., He, A., Lin, Z., Stevens,  
1832 S.M., Zhou, B., Pu, W.T., 2017. Mapping cell type-specific transcriptional enhancers  
1833 using high affinity, lineage-specific Ep300 bioChIP-seq. *Elife* 6.
- 1834 Zhou, Y., Wang, Y., Tischfield, M., Williams, J., Smallwood, P.M., Rattner, A., Taketo,  
1835 M.M., Nathans, J., 2014. Canonical WNT signaling components in vascular  
1836 development and barrier formation. *J Clin Invest* 124, 3825-3846.
- 1837 Zhou, Y., Williams, J., Smallwood, P.M., Nathans, J., 2015. Sox7, Sox17, and Sox18  
1838 Cooperatively Regulate Vascular Development in the Mouse Retina. *PLoS One* 10,  
1839 e0143650.  
1840
